# Supplementary material for: Cilium Expression Score Predicts Glioma Survival
Source: Front Genet. 2021 Nov 19;12:758391. doi: 10.3389/fgene.2021.758391 (PMC8640099; doi:10.3389/fgene.2021.758391)
Supplement: Supplementary file 1 [file Table2.XLSX]

## Sheet: Legend
Supplementary Table 2. Biclusters and their clinical and molecular enritchments from the GTEx+TCGA analysis (low expression).
Column Header	Column Description
Bicluster No.	Bicluster Serial Number	GTEx-TCGA Enrichment
Number of Samples in Bicluster	Number of Samples in Bicluster
p-value TCGA	Hypergeometric Test - Enrichment of TCGA Samples
FDR TCGA (BH)	TCGA p-value corrected - Benjamini Hochberg
Number of TCGA Samples	Number of TCGA Samples in Bicluster
p-value GTEx	Hypergeometric Test - Enrichment of TCGA Samples
FDR GTEx (BH)	GTEx p-value corrected - Benjamini Hochberg
Number of GTEx Samples	Number of GTEx Samples in Biclusters
p-value LGG	Hypergeometric Test - Enrichment of LGG Samples
FDR LGG (BH)	LGG p-value corrected - Benjamini Hochberg
Number of LGG Samples	Number of LGG Samples in Bicluster
p-value GBM	Hypergeometric Test - Enrichment of GBM Samples
FDR GBM (BH)	GBM p-value corrected - Benjamini Hochberg
Number of GBM Samples	Number of GBM Samples in Bicluster
GO Term 1	GO:BP Terms Obtained from GSEA Enrichment with EnrichR	Top-5 GO-BP Enrichment
Genes GO Term 1	Genes Associated with GO:BP Term 1
GO Term 2	GO:BP Terms Obtained from GSEA Enrichment with EnrichR
Genes GO Term 2	Genes Associated with GO:BP Term 2
GO Term 3	GO:BP Terms Obtained from GSEA Enrichment with EnrichR
Genes GO Term 3	Genes Associated with GO:BP Term 3
GO Term 4	GO:BP Terms Obtained from GSEA Enrichment with EnrichR
Genes GO Term 4	Genes Associated with GO:BP Term 4
GO Term 5	GO:BP Terms Obtained from GSEA Enrichment with EnrichR
Genes GO Term 5	Genes Associated with GO:BP Term 5
p-value Amygdala	Hypergeometric Test - Enrichment of Amygdala Samples in Bicluster	Brain Region Enrichment
Number Amygdala	Number of Amygdala Samples in Bicluster
p-value Anterior Cingulate Cortex	Hypergeometric Test - Enrichment of Anterior Cingulate Cortex Samples in Bicluster
Number ACC	Number of Anterior Cingulate Cortex Samples in Bicluster
p-value Caudate BG	Hypergeometric Test - Enrichment of Caudate Basal Ganglia Samples in Bicluster
Number BG	Number of Caudate Basal Ganglia Samples in Bicluster
p-value Cerebellar Hemisphere	Hypergeometric Test - Enrichment of Cerebellar Hemisphere Samples in Bicluster
Number CH	Number of Cerebellar Hemisphere Samples in Bicluster
p-value Cortex	Hypergeometric Test - Enrichment of Cortex Samples in Bicluster
Number Cortex	Number of Cortex Samples in Bicluster
p-value Frontal Cortex (Ba9)	Hypergeometric Test - Enrichment of Frontal Cortex (Ba9) Samples in Bicluster
Number Frontal Cortex (Ba9)	Number of Frontal Cortex (Ba9) Samples in Bicluster
p-value Hippocampus	Hypergeometric Test - Enrichment of Hippocampus Samples in Bicluster
Number Hippocampus	Number of Hippocampus Samples in Bicluster
p-value Hypothalamus	Hypergeometric Test - Enrichment of Hypothalamus Samples in Bicluster
Number Hypothalamus	Number of Hypothalamus Samples in Bicluster
p-value Nuclear Accumbens	Hypergeometric Test - Enrichment of Nuclear Accumbens Samples in Bicluster
Number NA	Number of Nuclear Accumbens Samples in Bicluster
p-value Putamen	Hypergeometric Test - Enrichment of Putamen in Bicluster
Number Putamen	Number of Putamen Samples in Bicluster
p-value Spinal Cord	Hypergeometric Test - Enrichment of Spinal Cord Samples in Bicluster
Number Spinal Cord	Number of Spinal Cord Samples in Bicluster
p-value Substantia Nigra	Hypergeometric Test - Enrichment of Substantia Nigra Samples in Bicluster
Number Substantia Nigra	Number of Substania Nigra Samples in Bicluster
p-value Cerebellum	Hypergeometric Test - Enrichment of Cerebellum Samples in Bicluster
Number Cerebellum	Number of Cerebellum Samples in Bicluster

## Sheet: GTEx-TCGA Enrichment
Bicluster No.	Number of Samples in Bicluster	p-value TCGA	FDR TCGA (BH)	Number of TCGA Samples	p-value GTEx	FDR GTEx (BH)	Number of GTEx Samples	p-value LGG	FDR LGG (BH)	Number of LGG Samples	p-value GBM	FDR GBM (BH)	Number of GBM Samples
Bicluster No.1	117	1	1	0	4.53678e-25	2.31376e-24	117	1	1	0	1	1	0
Bicluster No.2	278	5.18187e-102	2.64275e-100	258	1	1	20	4.73241e-07	4.82706e-06	114	3.69947e-121	2.69533e-120	144
Bicluster No.3	143	1	1	2	4.08203e-27	3.46972e-26	141	1	1	2	1	1	0
Bicluster No.4	106	1	1	6	1.38156e-14	2.27289e-14	100	1	1	6	1	1	0
Bicluster No.5	116	1	1	2	2.1496e-21	4.5679e-21	114	1	1	2	1	1	0
Bicluster No.6	120	1	1	0	1.0094e-25	6.43493e-25	120	1	1	0	1	1	0
Bicluster No.7	107	1	1	0	6.62983e-23	2.25414e-22	107	1	1	0	1	1	0
Bicluster No.8	101	1	1	0	1.29543e-21	2.94578e-21	101	1	1	0	1	1	0
Bicluster No.9	100	1	1	5	1.79885e-14	2.86691e-14	95	1	1	5	1	1	0
Bicluster No.10	153	1	1	1	5.49008e-31	1.39997e-29	152	1	1	1	1	1	0
Bicluster No.11	246	8.51653e-77	6.2049e-76	220	1	1	26	0.228508	0.97116	75	1.4956e-134	3.81377e-133	145
Bicluster No.12	117	1	1	5	9.15923e-18	1.73008e-17	112	1	1	5	1	1	0
Bicluster No.13	102	1	1	0	7.90083e-22	1.91877e-21	102	1	1	0	1	1	0
Bicluster No.14	242	1	1	35	1.75008e-16	3.18764e-16	207	1	1	22	0.982115	1	13
Bicluster No.15	219	6.55213e-73	3.34159e-72	200	1	1	19	1.4861e-12	2.52636e-11	108	3.6652e-52	1.43789e-51	92
Bicluster No.16	114	1	1	0	2.032e-24	9.42109e-24	114	1	1	0	1	1	0
Bicluster No.17	121	1	1	1	4.87965e-24	2.07385e-23	120	1	1	1	1	1	0
Bicluster No.18	102	1	1	1	5.23355e-20	1.06764e-19	101	1	1	1	1	1	0
Bicluster No.19	129	1	1	0	1.08863e-27	1.388e-26	129	1	1	0	1	1	0
Bicluster No.20	128	1	1	1	1.53269e-25	8.68524e-25	127	1	1	1	1	1	0
Bicluster No.21	204	7.1654e-90	1.21812e-88	200	1	1	4	0.101366	0.516966	66	4.72062e-127	4.01253e-126	134
Bicluster No.22	199	2.02361e-76	1.29005e-75	189	1	1	10	0.55175	1	56	3.47169e-127	3.54112e-126	133
Bicluster No.23	230	1.7202e-16	5.16061e-16	142	1	1	88	0.996107	1	49	4.65096e-51	1.69428e-50	93
Bicluster No.24	191	2.75722e-42	8.78863e-42	157	1	1	34	0.0773696	0.448097	63	1.04859e-61	4.86164e-61	94
Bicluster No.25	105	1	1	7	1.93988e-13	2.99799e-13	98	1	1	3	0.983977	1	4
Bicluster No.26	231	1	1	9	1.33499e-36	6.80842e-35	222	1	1	9	1	1	0
Bicluster No.27	151	1	1	3	2.57291e-27	2.62437e-26	148	1	1	3	1	1	0
Bicluster No.28	196	5.60776e-95	1.42998e-93	196	1	1	0	2.63063e-06	2.23603e-05	84	5.65357e-88	3.20369e-87	112
Bicluster No.29	186	4.70507e-61	1.84583e-60	170	1	1	16	8.45879e-06	6.16283e-05	79	6.48258e-59	2.75509e-58	91
Bicluster No.30	163	1	1	8	1.43444e-23	5.22548e-23	155	1	1	8	1	1	0
Bicluster No.31	200	1.12944e-63	4.80013e-63	181	1	1	19	6.37158e-30	3.2495e-28	129	1.17051e-15	3.51152e-15	52
Bicluster No.32	178	1.95277e-85	2.48978e-84	178	1	1	0	1.38996e-19	3.5444e-18	105	2.51189e-38	8.54044e-38	73
Bicluster No.33	117	1	1	2	1.32849e-21	2.94578e-21	115	1	1	2	1	1	0
Bicluster No.34	182	6.64506e-85	6.77796e-84	181	1	1	1	0.889582	1	45	4.84505e-143	2.47098e-141	136
Bicluster No.35	191	5.26112e-52	1.91655e-51	166	1	1	25	7.10687e-11	9.06126e-10	94	1.04117e-34	3.31873e-34	72
Bicluster No.36	129	1	1	0	1.08863e-27	1.388e-26	129	1	1	0	1	1	0
Bicluster No.37	188	1	1	17	6.79444e-20	1.33276e-19	171	1	1	16	1	1	1
Bicluster No.38	119	1	1	1	1.30625e-23	5.12452e-23	118	1	1	1	1	1	0
Bicluster No.39	104	1	1	0	2.93561e-22	7.4858e-22	104	1	1	0	1	1	0
Bicluster No.40	169	4.10856e-68	1.90488e-67	163	1	1	6	0.116961	0.542272	55	1.63361e-91	1.04142e-90	108
Bicluster No.41	105	0.999452	1	24	0.00118478	0.00177718	81	0.920008	1	24	1	1	0
Bicluster No.42	178	8.16108e-83	6.93692e-82	177	1	1	1	0.691061	1	48	4.88611e-129	6.22979e-128	129
Bicluster No.43	122	1	1	2	1.18835e-22	3.56505e-22	120	1	1	2	1	1	0
Bicluster No.44	155	1.07867e-46	3.66747e-46	139	1	1	16	0.0790759	0.448097	52	1.28516e-62	6.55433e-62	87
Bicluster No.45	141	1	1	2	1.09693e-26	7.99189e-26	139	1	1	2	1	1	0
Bicluster No.46	172	2.66852e-73	1.51216e-72	168	1	1	4	0.951125	1	40	3.4586e-130	5.87962e-129	128
Bicluster No.47	111	1	1	6	1.56414e-15	2.65904e-15	105	1	1	6	1	1	0
Bicluster No.48	105	1	1	0	1.7884e-22	4.91395e-22	105	1	1	0	1	1	0
Bicluster No.49	139	1	1	11	4.67571e-16	8.2228e-16	128	1	1	10	0.999997	1	1
Bicluster No.50	115	1	1	1	9.30955e-23	2.96742e-22	114	1	1	1	1	1	0
Bicluster No.51	168	1	1	10	1.83069e-22	4.91395e-22	158	1	1	9	1	1	1

## Sheet: GO BP Enrichment
Bicluster No.	GO Term 1	Genes GO Term 1	GO Term 2	Genes GO Term 2	GO Term 3	Genes GO Term 3	GO Term 4	Genes GO Term 4	GO Term 5	Genes GO Term 5
Bicluster No.1	positive regulation of intracellular signal transduction (GO:1902533)	SEMA5A;ALK;ITGB1;DDR1;TRAF3IP2;FLT4;WWC1;LITAF;FGF2;SOX2;AKAP13;GJA1;TRIM5;KDR;CASP1;TNFAIP8L3;SOX9;LGALS9;EPHB2;TRIM22;EPHB4;WLS;NKX3-1;PDGFRB;RIPK2;HGF;F2R;TNFRSF19;GAB1;SHISA5;SOX11;TICAM1;TNFRSF1B;RHOC;RHOA;VAV1;DCN;TNFRSF1A;GPRC5B;HCLS1;PRKD2;PRKD1;TP53;BIRC3;CANT1;ADRB2;DDX60;EGFR;PIK3R5;BCL2L11;TSPAN6;PDGFC;ERBB2;HMOX1;APOL3;SASH1;BCAP31;TCF7L2;TGFB2;TGFB1;CAV2;EGF;PLK2;NEK6;CAV1;AKR1C3;TN…	cytokine-mediated signaling pathway (GO:0019221)	ITGB1;IFITM3;CDKN1A;IFITM2;HFE;ITGB2;INPPL1;IL1RAP;IFI35;IFI30;FGF2;IFIT3;CX3CL1;ICAM1;SOX2;MT2A;TRIM5;CASP1;MAP3K8;IL12A;TRIM21;B2M;IL6R;TRIM22;IL13RA1;IL15RA;ANXA1;ANXA2;RIPK2;IFNGR1;IFNGR2;HGF;MMP2;BGN;FLT3LG;LIFR;IRAK3;GAB2;TNFRSF1B;OSMR;VAV1;DCN;TNFRSF1A;HLA-E;MTAP;OAS1;FSCN1;RHOU;TP53;IRF9;BIRC3;RNASEL;SP100;FOXC1;CEBPD;MAOA;CSF2RB;ADIPOR2;FOXO1;PSMB10;PTPRZ1;INPP5D;S1PR1;HMOX1;STAT6;GBP2;G…	cellular response to cytokine stimulus (GO:0071345)	ITGB1;CDKN1A;ITGB2;INPPL1;AQP4;CIB1;IL1RAP;BRCA1;FGF2;CX3CL1;ICAM1;SOX2;MT2A;HYAL2;DPYSL3;CASP1;IL12A;SOX9;LGALS9;IL6R;IL13RA1;NKX3-1;ANXA1;PTGIS;DAPK1;IFNGR1;IFNGR2;HGF;MMP2;BGN;FLT3LG;LIFR;IRAK3;GAB2;TNFRSF1B;OSMR;RHOA;VAV1;DCN;TNFRSF1A;FSCN1;HCLS1;RHOU;TP53;FOXC1;CEBPD;MAOA;LEF1;CXCR4;CSF2RB;PHB;FOXO1;ZFP36L2;ZFP36L1;PTPRZ1;INPP5D;S1PR1;HMOX1;STAT6;CD58;TGFB1;SMAD3;IL10RA;FN1;PTPN13;PODN;PTPN1…	positive regulation of nucleic acid-templated transcription (GO:1903508)	CDKN1C;ACVRL1;SPI1;RORB;BRCA1;FGF2;ETS1;GLI3;ETS2;CKS1B;SOX2;LYL1;HMGN5;SALL1;CHEK2;CREB3L2;CD38;SOX8;SOX9;TEAD2;NKX3-1;DTX3L;F2R;RHOG;SOX11;MITF;PARP9;RUNX2;RUNX1;TOX3;ELF1;MYCN;PSRC1;MDFIC;TAL1;ELF4;ZNF516;PPARA;TP53;YAP1;SP100;FOXC1;NOTCH1;HDAC1;LEF1;LRP5;PHB;EGFR;FOXO1;NPAS3;SEC14L2;PRDM16;ATOH8;RREB1;SMAD2;ZFHX3;FZD2;TGFB1;SMAD3;FZD4;EGF;ATAD2;NFATC2;NR1H3;NFATC1;BMP7;FLI1;BMP2;CD4;REST;BAMB…	regulation of small GTPase mediated signal transduction (GO:0051056)	ARHGAP1;ARHGAP18;KALRN;ARHGAP6;RHOBTB1;FGD3;PREX1;SYDE1;AKAP13;ARHGDIA;ARHGDIB;RAC2;PLCE1;CGNL1;STARD13;STARD8;ARAP2;RHOG;GMIP;RHOC;ARHGAP25;RHOA;VAV1;VAV2;RHOB;ARHGAP32;ARHGAP10;ARHGAP31;DLC1;RHOJ;TRIP10;RHOU;RHOQ;ARHGEF6
Bicluster No.2	axonogenesis (GO:0007409)	NTNG2;BRSK2;RAB3A;ATL1;GFRA1;PPP3CB;LRFN5;RPS6KA5;RELN;KIF5C;KIF3A;SLITRK1;DOK6;SLITRK4;MAP1A;KIF5A;TNR;APBB1;DSCAML1;SPTBN2	positive regulation of synaptic transmission (GO:0050806)	RIMS2;RIMS1;STX1B;RELN;CACNG2;GRIN2C;PRKCZ;SHISA7;SHANK2;VAMP2;SLC8A2	neuron projection morphogenesis (GO:0048812)	NTNG2;CNTNAP2;BRSK2;RAB3A;ATL1;MINK1;MAPK8IP2;LRFN5;SLITRK1;SLITRK4;MAP1A;FLRT1;APBB1;DSCAML1;SHANK2;ZNF365	modulation of excitatory postsynaptic potential (GO:0098815)	RIMS2;RIMS1;STX1B;RELN;PRKCZ;SHANK2;CBLN1	cell morphogenesis involved in neuron differentiation (GO:0048667)	NTNG2;BRSK2;LRFN5;RAB3A;SLITRK1;ATL1;SLITRK4;MAP1A;MINK1;APBB1;MAPK8IP2;DSCAML1
Bicluster No.3	respiratory electron transport chain (GO:0022904)	NDUFB9;NDUFA13;NDUFA7;NDUFB7;NDUFB3;NDUFA2;UQCR11;ETFB;COX6A1;COX6B1;SDHAF2;NDUFS6;UQCRQ	regulation of cellular amine metabolic process (GO:0033238)	PSMB6;PSMB7;PSMB5;PSMD4;PSMC3;PSMB3;OAZ2;PSMB10;PSMB8;PSMB9	regulation of cellular amino acid metabolic process (GO:0006521)	PSMB6;PSMB7;PSMB5;PSMD4;PSMC3;PSMB3;OAZ2;PSMB10;PSMB8;PSMB9	protein targeting to ER (GO:0045047)	RPS9;RPL41;RPSA;RPS14;SPCS1;RPL35;CHMP4B;RPL38;RPL27;CHMP4A;RPS2;RPL28;UBA52	mitochondrial ATP synthesis coupled electron transport (GO:0042775)	NDUFB9;NDUFA13;NDUFA7;NDUFB7;SDHAF2;NDUFS6;UQCRQ;NDUFB3;NDUFA2;UQCR11;COX6A1;COX6B1
Bicluster No.4	positive regulation of intracellular signal transduction (GO:1902533)	DDR1;TRAF3IP2;WWC1;DDX60;FGF2;EGFR;SOX2;AKAP13;GJA1;TSPAN6;PDGFC;ERBB2;TNFAIP8L3;SOX9;EPHB4;SASH1;WLS;PDGFRB;TCF7L2;TGFB2;TGFB1;NEK6;GAB1;TICAM1;MERTK;RHOC;TNFRSF1A;GPRC5B;AXL;BCL2;PRKD2;PRKD1;LTBR;TP53	mesenchymal cell differentiation (GO:0048762)	TGFBR3;RANBP3L;TGFB2;NOTCH1;TGFB1;HEY2;LOXL3;SOX9;BMP7	hippo signaling (GO:0035329)	YAP1;TJP1;WWTR1;WWC1;DCHS1;FAT4;AMOT;STK3	regulation of intracellular signal transduction (GO:1902531)	PHLPP1;HDAC1;WWC1;ARHGAP18;EGFR;PREX1;AKAP13;SYDE1;GNA12;TP53BP2;BARD1;STARD13;TGFB2;TGFB1;ARAP2;PTPN13;RHOC;BMP7;VAV2;RHOB;ARHGAP10;ARHGAP31;DLC1;PRKD2;TP53;RHOQ;ARHGEF6	regulation of ERK1 and ERK2 cascade (GO:0070372)	DDR1;PDGFRB;NOTCH2;NOTCH1;TGFB1;PRKCA;MERTK;FGF2;EGFR;AXL;PDGFC;CNKSR3;ERBB2;P2RY1;TIMP3;PRKD2;TNFAIP8L3;EZR;TLR4;EPHB4
Bicluster No.5	extracellular matrix organization (GO:0030198)	CSGALNACT1;ITGB1;TGFB1;LAMC3;MMP2;ITGA1;FN1;BGN;TNC;HSPG2;LOXL1;FBLN5;DCN;ICAM1;COL1A2;ADAMTS3;PXDN;COL5A2;KDR;PECAM1;ITGA6;A2M;AGRN;FBN1	regulation of cell migration (GO:0030334)	CLIC4;JAG1;ANXA1;NOTCH1;TGFB1;PLXND1;F2R;LEF1;LDB2;RHOC;RND3;RHOA;RHOBTB1;MYLK;CXCL16;BST2;BMP2;PODXL;PDGFC;KDR;SGK3;ITGA6;MAPRE1	negative regulation of cellular process (GO:0048523)	KANK2;SEMA5A;BTG3;SP100;TES;NOTCH1;PLXND1;ETS1;PODXL;ARHGDIB;SH3BP4;ZNF503;IGFBP7;SKIL;S100A11;APOBEC3C;SMAD3;TGFB1;CAV1;F2R;ITGA1;PTPN14;BST2;VAMP8;TGFBR3;BMP2;REST;CD9;PRKD1;SIPA1	positive regulation of intracellular signal transduction (GO:1902533)	SEMA5A;ITGB1;DDX60;AKAP13;TRIM5;TSPAN6;PDGFC;KDR;EPHB4;TRIM22;APOL3;TGFB1;CAV2;PLK2;CAV1;F2R;GAB1;RHOC;TNFRSF1B;RHOA;DCN;BST2;BMP2;CD4;TNIP2;NEDD4;PRKD1;TRIM38	cytokine-mediated signaling pathway (GO:0019221)	ITGB1;SP100;INPPL1;IFI35;IL1RAP;ICAM1;TRIM5;INPP5D;MAP3K8;GBP2;B2M;TRIM21;IL6R;TRIM22;IL13RA1;ANXA1;TGFB1;ANXA2;MMP2;FN1;BGN;ISG15;TNFRSF1B;PSMB8;DCN;HLA-E;BST2;CD4;COL1A2;TNIP2;VIM;TRIM38
Bicluster No.6	regulation of small GTPase mediated signal transduction (GO:0051056)	STARD13;ARAP2;RHOG;ARHGAP18;GMIP;KALRN;ARHGAP25;RHOBTB1;RHOA;VAV2;AKAP13;ARHGAP10;RHOU;RHOQ	actin filament organization (GO:0007015)	CAP1;DPYSL3;RHOG;PLS3;RHOU;ARHGAP25;RHOBTB1;RHOA;SHROOM4;RHOQ	nervous system development (GO:0007399)	SEMA5A;PLXND1;PCDH10;NAV1;PCDH19;KALRN;KIF17;POU3F2;PCDH17;ZEB2;SALL1;PDGFC;ENC1;ST8SIA4;DCX;PMP22;EPHB2;ITM2A;SCRG1;GPM6B	ephrin receptor signaling pathway (GO:0048013)	PSENEN;YES1;ARPC3;EPHB2;KALRN;RHOA;ACTG1;VAV2	regulation of cell migration (GO:0030334)	CLIC4;PLXND1;SEMA3C;RDX;PRKCA;PTPRK;LDB2;RHOA;RHOBTB1;DOCK10;BMP2;PDCD10;DPYSL3;PDGFC;KDR;MAPRE1
Bicluster No.7	regulation of small GTPase mediated signal transduction (GO:0051056)	STARD13;ARHGAP1;ARAP2;RHOG;ARHGAP18;GMIP;RHOC;KALRN;RHOBTB1;RHOA;VAV2;SYDE1;AKAP13;ARHGDIA;RHOU;RHOQ;ARHGEF6	regulation of intracellular signal transduction (GO:1902531)	HDAC1;ARHGAP1;ARHGAP18;KALRN;RHOBTB1;AKAP13;SYDE1;RRAS;ARHGDIA;GNA12;STARD13;TGFB1;RHOG;ARAP2;RHOC;GMIP;PTPN13;BMP7;RHOA;VAV2;PRKD2;RHOU;TP53;RHOQ;ARHGEF6	Rho protein signal transduction (GO:0007266)	RTKN;GNA12;ARHGAP1;RHOG;CDC42EP1;TAX1BP3;RHOU;RHOC;RHOA;RHOQ;RHOBTB1	Ras protein signal transduction (GO:0007265)	RTKN;PLK2;ARHGAP1;RHOG;RHOC;RHOA;RHOBTB1;RAB31;RRAS;MAPKAPK3;GNA12;CDC42EP1;TAX1BP3;RHOU;PRKD1;TP53;RHOQ	actin filament bundle organization (GO:0061572)	DPYSL3;FSCN1;PLS3;RHOC;EZR;RHOBTB1;RHOA
Bicluster No.8	regulation of small GTPase mediated signal transduction (GO:0051056)	ARHGAP32;AKAP13;STARD13;ARAP2;RHOG;KALRN;RHOBTB1;RHOQ;VAV2;ARHGEF6	regulation of apoptotic process (GO:0042981)	NOTCH2;HDAC1;KALRN;IFIT3;SH3RF1;STK3;SOX2;AKAP13;CCND2;PDCD10;TP53BP2;EPHB2;BARD1;PSENEN;EGLN3;DAPK1;GADD45A;SPHK1;ANXA5;ANO6;BMP7;VAV2;TOX3;BMP2;REST;CAT;ARHGEF6	regulation of cartilage development (GO:0061035)	BMP2;TRPS1;SOX6;SOX5	regulation of mesenchymal stem cell differentiation (GO:2000739)	REST;SOX6;SOX5	regulation of intracellular signal transduction (GO:1902531)	BARD1;STARD13;HDAC1;RHOG;ARAP2;PTPN13;KALRN;BMP7;RHOBTB1;VAV2;AKAP13;ARHGAP32;BMP2;GNA12;TP53BP2;RHOQ;ARHGEF6
Bicluster No.9	cytokine-mediated signaling pathway (GO:0019221)	IFITM3;CDKN1A;SP100;IFITM2;MAOA;INPPL1;IFI35;ADIPOR2;ICAM1;MT2A;TRIM5;HMOX1;STAT6;MAP3K8;GBP2;B2M;IL6R;TRIM22;IL15RA;ANXA1;TGFB1;ANXA2;BGN;MSN;TNFRSF10B;OSMR;TNFRSF1B;PSMB8;HLA-E;PSMB9;TNFRSF1A;BST2;TNIP2;FAS;VIM;TRIM38;LTBR;TP53;IRF9;BIRC3	regulation of I-kappaB kinase/NF-kappaB signaling (GO:0043122)	TNFRSF10B;TNFAIP3;HSPB1;RHOC;TICAM1;TNFRSF1A;BST2;AKAP13;TRIM5;TNIP2;BCL3;HMOX1;LGALS9;LTBR;TRIM38;TRIM22;WLS;BIRC3	positive regulation of I-kappaB kinase/NF-kappaB signaling (GO:0043123)	TNFRSF10B;TICAM1;RHOC;TNFRSF1A;BST2;AKAP13;TRIM5;TNIP2;HMOX1;LGALS9;LTBR;TRIM38;TRIM22;WLS;BIRC3	regulation of cell proliferation (GO:0042127)	KANK2;BTG3;CDKN1A;TES;NOTCH1;CD81;HDAC1;LRP5;CIB1;ETS1;ZFP36L1;SH3BP4;IGFBP7;S1PR3;IL6R;S100A11;ZBTB7C;WWTR1;YES1;JAG1;TGFB1;TNFRSF10B;OSMR;TNFRSF1B;PTPN14;TNFRSF1A;FGR;FES;FAS;LTBR;TP53	interferon-gamma-mediated signaling pathway (GO:0060333)	MT2A;SP100;TRIM5;TRIM38;GBP2;B2M;TRIM22;IRF9;ICAM1;HLA-E
Bicluster No.10	neutrophil activation involved in immune response (GO:0002283)	CD63;GMFG;ITGB2;LRMP;SLC2A5;CTSS;C3;SDCBP;C3AR1;TIMP2;NCKAP1L;B2M;GOLGA7;S100A11;CTSC;CD33;LAIR1;CAP1;CD53;FCER1G;SYK;NFAM1;RNASET2;ANO6;CYBA;OSCAR;VAMP8;TSPAN14;TYROBP;PTPRC;FCGR2A;BIN2;NPC2;MNDA;DOCK2	neutrophil degranulation (GO:0043312)	CD63;GMFG;ITGB2;LRMP;SLC2A5;CTSS;C3;SDCBP;C3AR1;TIMP2;NCKAP1L;B2M;GOLGA7;S100A11;CTSC;CD33;LAIR1;CAP1;CD53;FCER1G;NFAM1;RNASET2;ANO6;CYBA;OSCAR;VAMP8;TSPAN14;TYROBP;PTPRC;FCGR2A;BIN2;NPC2;MNDA;DOCK2	neutrophil mediated immunity (GO:0002446)	CD63;GMFG;ITGB2;LRMP;SLC2A5;CTSS;C3;SDCBP;C3AR1;TIMP2;NCKAP1L;B2M;GOLGA7;S100A11;CTSC;CD33;LAIR1;CAP1;CD53;FCER1G;NFAM1;RNASET2;ANO6;CYBA;OSCAR;VAMP8;TSPAN14;TYROBP;PTPRC;FCGR2A;BIN2;NPC2;MNDA;DOCK2	cellular response to cytokine stimulus (GO:0071345)	CCR1;CD86;ITGB1;CSF1R;SELPLG;CSF3R;IL10RA;DOCK8;ITGB2;IL18;CSF2RB;IL1RAP;PTPN13;AIF1;CSF2RA;VAV1;CD4;INPP5D;HCLS1;LGALS9;VIM;IL12RB1;IL6R;IL13RA1	positive regulation of alpha-beta T cell proliferation (GO:0046641)	SYK;EBI3;IL18;LGALS9;RASAL3;TGFBR2
Bicluster No.11	protein phosphorylation (GO:0006468)	SMG1;KSR1;MINK1;BRAF;CDC42BPB;TTBK1;TTBK2;IGF1R;DSTYK;SLK;WNK1;AKT3;TAOK2;SIK3;AAK1;RICTOR	cytoskeleton-dependent intracellular transport (GO:0030705)	KIF5C;KIF1B;KIF1A;DYNLL2	positive regulation of nuclear-transcribed mRNA poly(A) tail shortening (GO:0060213)	TNRC6C;CPEB3;TNRC6B	regulation of nuclear-transcribed mRNA poly(A) tail shortening (GO:0060211)	TNRC6C;CPEB3;TNRC6B	regulation of cell-matrix adhesion (GO:0001952)	MACF1;SLK;MINK1;NF1;TSC1
Bicluster No.12	regulation of cell migration (GO:0030334)	ACVRL1;PDGFRB;CLIC4;ROBO4;NOTCH1;TGFB1;PLXND1;LEF1;PRKCA;RHOC;PODN;RHOBTB1;CXCL16;BST2;PODXL;DPYSL3;GNA12;KDR;ENG	vasculogenesis (GO:0001570)	PDGFRB;NOTCH1;TGFB1;FLT4;KDR;TGFBR2;ENG	regulation of small GTPase mediated signal transduction (GO:0051056)	SYDE1;AKAP13;STARD13;STARD8;RHOG;ARHGAP18;RHOC;KALRN;RHOBTB1;CGNL1;VAV2	positive regulation of intracellular signal transduction (GO:1902533)	PDGFRB;TGFB1;FLT4;RHOC;TNFRSF1B;BST2;AKAP13;CD4;TRIM5;TNIP2;KDR;PRKD2;LGALS9;PRKD1;TRIM38;EPHB4;TRIM22;APOL3;ENG	negative regulation of blood vessel endothelial cell migration (GO:0043537)	ACVRL1;CARD10;STARD13;NOTCH1;TGFB1;MMRN2
Bicluster No.13	nervous system development (GO:0007399)	SEMA5A;ZEB2;SALL1;PTPRZ1;PDGFC;PMP22;NAV1;EPHB2;SCRG1;PCDH17;GPM6B;SDK2	regulation of mitotic nuclear division (GO:0007088)	LRP5;PMEPA1;BMP7;CDC14A;CDC14B	negative regulation of mitotic cell cycle (GO:0045930)	SMAD3;BMP7;CDC14A;CDC14B	response to cytokine (GO:0034097)	SMAD3;DPYSL3;TIMP2;PRKCA;PTPN13;CXCL16	positive regulation of ossification (GO:0045778)	ANO6;PRKD1;BMP7;GPM6B
Bicluster No.14	nervous system development (GO:0007399)	NCKAP1;GPM6A;DAGLA;PSPN;SRC;NCAN;DPF1;ADAM23;CRMP1;NRCAM;PPP2R5D;EPHB1	positive regulation of neural precursor cell proliferation (GO:2000179)	FZD3;SMARCD3;INSM1	neuron projection morphogenesis (GO:0048812)	NCKAP1;GPM6A;MAP2;LRRN2;LRFN1;NRCAM;EPHB1	central nervous system development (GO:0007417)	NCKAP1;NDRG4;PSPN;SRC;NCAN;ADAM23;NRCAM	purine ribonucleoside monophosphate catabolic process (GO:0009169)	NUDT11;NUDT10
Bicluster No.15	anterograde trans-synaptic signaling (GO:0098916)	UNC13C;SNAP25;GABRB2;GABRA1;SLC12A5;CHRNA4;KCNIP2;CACNA1B;GAD2;SLC1A6;HTR5A;CPLX1;SYN2;GABRG2;SYN1;GABRG1;GRM4;KIF5A;CBLN1	chemical synaptic transmission (GO:0007268)	UNC13C;SNAP25;GABRB2;NAPB;GABRA1;SLC12A5;CHRNA4;KCNIP2;CACNA1B;GAD2;SLC1A6;HTR5A;CPLX1;SYN2;GABRG2;SYN1;GABRG1;GRM4;KIF5A;CBLN1	regulation of synaptic vesicle exocytosis (GO:2000300)	RIMS2;NAPB;STX1B;RAB3A;STXBP1;SYN1	positive regulation of synaptic transmission (GO:0050806)	RIMS2;STX1B;CUX2;CACNG2;CACNG3;SLC8A2;SHANK1	ion transport (GO:0006811)	RYR2;GABRB2;GABRA1;SLC12A5;SLC32A1;CHRNA4;ATP1A3;ATP2B3;SLC1A6;GABRG2;SLC8A2;GABRG1
Bicluster No.16	neutrophil degranulation (GO:0043312)	CD53;GMFG;ITGB2;LRMP;ANO6;VAMP8;PTPRC;FCGR2A;BIN2;MNDA;DOCK2;S100A11;CTSC	neutrophil activation involved in immune response (GO:0002283)	CD53;GMFG;ITGB2;LRMP;ANO6;VAMP8;PTPRC;FCGR2A;BIN2;MNDA;DOCK2;S100A11;CTSC	neutrophil mediated immunity (GO:0002446)	CD53;GMFG;ITGB2;LRMP;ANO6;VAMP8;PTPRC;FCGR2A;BIN2;MNDA;DOCK2;S100A11;CTSC	negative regulation of cell adhesion (GO:0007162)	SEMA5A;JAG1;PTPRC;PLXND1;ARHGDIB	lymphocyte differentiation (GO:0030098)	ITGB1;CD4;PTPRC;PLCG2;IKZF1
Bicluster No.17	regulated exocytosis (GO:0045055)	CD63;TMED10;SCCPDH;VAMP7;WDR1;PROS1;LAMP2;LHFPL2	platelet degranulation (GO:0002576)	CD63;SCCPDH;WDR1;PROS1;LAMP2;LHFPL2	cellular protein metabolic process (GO:0044267)	ATG3;SERP1;PARP4;PROS1;UBE2D2;MRPS33;QPCT;IGFBP7;PDIA6;HSP90B1;SEC11C	protein modification process (GO:0036211)	ATG3;SERP1;PARP4;UBE2D2;QPCT	negative regulation of protein dephosphorylation (GO:0035308)	YWHAE;FKBP1A;PPP1R11
Bicluster No.18	positive regulation of intracellular signal transduction (GO:1902533)	DDR1;TGFB1;TRAF3IP2;AXL;ERBB2;PRKD2;SOX9;RHOC;FGF2;TP53;TNFRSF1A	regulation of fibroblast migration (GO:0010762)	TGFB1;GNA12;FGF2	regulation of ERK1 and ERK2 cascade (GO:0070372)	DDR1;TGFB1;AXL;ERBB2;CIB1;PRKD2;EZR;FGF2	positive regulation of protein phosphorylation (GO:0001934)	DDR1;TGFB1;CD81;AXL;ERBB2;CIB1;PRKD2;SOX9;TP53;TNFRSF1A	positive regulation of cellular protein catabolic process (GO:1903364)	CD81;PTTG1IP;EZR
Bicluster No.19	protein targeting to lysosome (GO:0006622)	SCARB2;NCOA4;LAMP2;RAB7A	protein transport (GO:0015031)	RAB10;GOLPH3;TMED10;LAMP2;GOLGA7;RAB5A;RAB22A;RAB11A;HSP90B1;RAB7A	Ras protein signal transduction (GO:0007265)	RAP2C;RAB10;RAP2A;RAC1;RAB5A;RAB22A;RAB11A;RAB7A	Rab protein signal transduction (GO:0032482)	RAB10;RAB5A;RAB22A;RAB11A;RAB7A	neutrophil degranulation (GO:0043312)	CD53;RAP2C;RAB10;SDCBP;VAMP7;QPCT;LAMP2;ARPC5;RAC1;GOLGA7;RAB7A
Bicluster No.20	protein targeting (GO:0006605)	DNAJC19;SPCS2;PEX19;SPCS1;LAMP2;VPS41;ZDHHC4	regulated exocytosis (GO:0045055)	F8;VAMP7;TMED10;SCCPDH;LAMP2	protein stabilization (GO:0050821)	STX12;CRTAP;PEX19;PDCD10;LAMP2	regulation of plasma membrane bounded cell projection assembly (GO:0120032)	DYNC2LI1;RDX;RAB5A	regulation of organelle assembly (GO:1902115)	DYNC2LI1;RDX;RAB5A
Bicluster No.21	cytoskeleton-dependent intracellular transport (GO:0030705)	KIF5C;KIF5A;KIF1A;DYNLL2	receptor localization to synapse (GO:0097120)	DLG2;KIF5C;KIF5A	negative regulation of dephosphorylation (GO:0035305)	PPP1R16B;DLG2;SLC7A14;PPP1R12B	regulation of phosphatase activity (GO:0010921)	DLG2;SLC7A14;TSC1;PPP1R12B	protein deubiquitination involved in ubiquitin-dependent protein catabolic process (GO:0071947)	ZRANB1;OTUD7A
Bicluster No.22	cytoskeleton-dependent intracellular transport (GO:0030705)	KIF5C;KIF5A;KIF1A;DYNLL2	axonogenesis (GO:0007409)	BRSK2;KIF5C;KIF3A;KIF5A;MAP1A;TNR;DSCAML1	positive regulation of synaptic transmission (GO:0050806)	STX1B;SHISA7;VAMP2;SLC8A2	regulation of cation channel activity (GO:2001257)	JPH3;MAPK8IP2;SHISA7;VAMP2	plus-end-directed organelle transport along microtubule (GO:0072386)	KIF3A;MAPT
Bicluster No.23	histone modification (GO:0016570)	USP36;ATXN7;NSD1;HUWE1;EP300;BAZ2A;HDAC6	negative regulation of TOR signaling (GO:0032007)	TSC2;UBR2;TSC1	protein deubiquitination (GO:0016579)	USP24;USP36;INO80D;ATXN7;USP34;EP300	protein modification by small protein removal (GO:0070646)	USP24;USP36;INO80D;ATXN7;USP34;EP300	nucleus organization (GO:0006997)	USP36;NUMA1;ATXN7
Bicluster No.24	positive regulation of synaptic transmission (GO:0050806)	SLC8A3;STX1B;CUX2;PRKCZ;SHISA7;SHANK2;SLC8A2;SHANK1	positive regulation of excitatory postsynaptic potential (GO:2000463)	STX1B;CUX2;PRKCZ;SHANK2;SHANK1	long-term synaptic potentiation (GO:0060291)	SLC8A3;PRKCZ;SHANK2;SLC8A2;SHANK1	modulation of excitatory postsynaptic potential (GO:0098815)	STX1B;CUX2;PRKCZ;SHANK2;SHANK1	regulation of cation channel activity (GO:2001257)	JPH4;JPH3;MAPK8IP2;SHISA7;SHANK2;SHANK1
Bicluster No.25	negative regulation of neuron differentiation (GO:0045665)	SOX9;APOE;BMP7;ITM2C	cellular nitrogen compound catabolic process (GO:0044270)	MPST;TST	positive regulation of kidney development (GO:0090184)	SOX8;SOX9	negative regulation of Wnt signaling pathway (GO:0030178)	LRP4;TAX1BP3;SOX9;APOE;APCDD1	carnitine metabolic process (GO:0009437)	BBOX1;ALDH9A1
Bicluster No.26	regulation of transcription, DNA-templated (GO:0006355)	SS18;ZHX2;SMAD4;SMURF2;ZNF480;USP3;ACTL6A;TCF12;TULP3;VEZF1;ZNF24;SMAD5;NFIA;SP1;TP53INP1;ZNF678;ZNF677;PATZ1;KIAA1958;GABPA;NFE2L2;PHF19	positive regulation of transcription from RNA polymerase II promoter involved in cellular response to chemical stimulus (GO:1901522)	SMAD4;SMAD5;NFE2L2	regulation of DNA endoreduplication (GO:0032875)	STAG2;SMC3	positive regulation of transcription, DNA-templated (GO:0045893)	SS18;SMAD4;MAML2;TCF12;VEZF1;ZNF24;SMAD5;NFIA;SP1;TP53INP1;GABPA;NFE2L2;PHF19	positive regulation of transcription from RNA polymerase II promoter (GO:0045944)	SS18;SMAD4;MAML2;NFIA;SP1;TCF12;VEZF1;ZNF24;SMAD5;GABPA;NFE2L2
Bicluster No.27	mitochondrial ATP synthesis coupled electron transport (GO:0042775)	NDUFA13;NDUFA7;NDUFS8;NDUFB7;NDUFS6;UQCRQ;NDUFA2;UQCR11;COX6A1	respiratory electron transport chain (GO:0022904)	NDUFA13;NDUFA7;NDUFS8;NDUFB7;NDUFS6;UQCRQ;NDUFA2;UQCR11;COX6A1	NADH dehydrogenase complex assembly (GO:0010257)	NDUFA13;NDUFA7;NDUFS8;NDUFB7;NDUFS6;NDUFA2;NDUFAF3	mitochondrial respiratory chain complex I biogenesis (GO:0097031)	NDUFA13;NDUFA7;NDUFS8;NDUFB7;NDUFS6;NDUFA2;NDUFAF3	mitochondrial respiratory chain complex I assembly (GO:0032981)	NDUFA13;NDUFA7;NDUFS8;NDUFB7;NDUFS6;NDUFA2;NDUFAF3
Bicluster No.28	regulation of transmembrane transport (GO:0034762)	KCNJ12;KCNJ9;KCNJ3	central nervous system development (GO:0007417)	SH3GL3;CNTNAP2;MBP;SERPINI1;SH3GL2;AFF2	anterograde trans-synaptic signaling (GO:0098916)	KIF5A;CACNA1B;MBP;SLC1A6;SYN2;GABRG1	regulation of ion transmembrane transport (GO:0034765)	KCNJ12;KCNJ9;KCNJ3	potassium ion import (GO:0010107)	KCNJ12;KCNJ9;KCNJ3
Bicluster No.29	regulation of short-term neuronal synaptic plasticity (GO:0048172)	RAB3A;SYP;SHISA7;PPFIA3;SLC8A2	anterograde trans-synaptic signaling (GO:0098916)	GRM4;CHRNA4;KCNIP2;KIF5A;CACNA1B;SLC1A6;SYN2;CPLX1;GABRG2;SYN1;CBLN1	regulation of secretion by cell (GO:1903530)	RIMS2;RAB3C;RAB3A;CPLX2;CPLX1;SYN1;VAMP2	regulation of synaptic vesicle exocytosis (GO:2000300)	RIMS2;STX1B;RAB3A;STXBP1;SYN1	positive regulation of synaptic transmission (GO:0050806)	RIMS2;STX1B;CACNG2;PRKCZ;SHISA7;VAMP2;SLC8A2
Bicluster No.30	SRP-dependent cotranslational protein targeting to membrane (GO:0006614)	RPL32;RPLP1;RPLP0;RPL8;RPS14;RPL7A;RPS17;RPS19;RPS18;RPL36;RPL35;RPLP2;RPL38;SEC61B;RPS2;RPS11;RPS10;RPL39;RPL19;RPS9;RPS5;RPL23A;RPS25;RPS28;RPS27;RPL37A;RPL27;RPL29;RPL28;UBA52	cotranslational protein targeting to membrane (GO:0006613)	RPL32;RPLP1;RPLP0;RPL8;RPS14;RPL7A;RPS17;RPS19;RPS18;RPL36;RPL35;RPLP2;RPL38;RPS2;RPS11;RPS10;RPL39;RPL19;RPS9;RPS5;RPL23A;RPS25;RPS28;RPS27;RPL37A;RPL27;RPL29;RPL28;UBA52	protein targeting to ER (GO:0045047)	RPL32;RPLP1;RPLP0;RPL8;RPS14;RPL7A;RPS17;RPS19;RPS18;RPL36;RPL35;RPLP2;RPL38;RPS2;RPS11;RPS10;RPL39;RPL19;RPS9;RPS5;RPL23A;RPS25;RPS28;RPS27;RPL37A;RPL27;RPL29;RPL28;UBA52	viral gene expression (GO:0019080)	RPL32;RPLP1;RPLP0;RPL8;RPS14;RPL7A;RPS17;RPS19;RPS18;RPL36;RPL35;RPLP2;RPL38;RPS2;RPS11;RPS10;RPL39;RPL19;RPS9;RPS5;RPL23A;RPS25;RPS28;RPS27;RPL37A;RPL27;RPL29;RPL28;UBA52	nuclear-transcribed mRNA catabolic process, nonsense-mediated decay (GO:0000184)	RPL32;RPLP1;RPLP0;RPL8;RPS14;RPL7A;RPS17;RPS19;RPS18;RPL36;RPL35;RPLP2;RPL38;RPS2;RPS11;RPS10;RPL39;RPL19;RPS9;RPS5;RPL23A;RPS25;RPS28;RPS27;RPL37A;RPL27;RPL29;RPL28;UBA52
Bicluster No.31	rRNA base methylation (GO:0070475)	NSUN5P1;NSUN5P2	regulation of leukocyte cell-cell adhesion (GO:1903037)	KAT2A;LAT	RNA modification (GO:0009451)	QTRT1;NSUN5P1;NSUN5P2	regulation of lymphocyte activation (GO:0051249)	KAT2A;LAT	intra-S DNA damage checkpoint (GO:0031573)	EME2;ORAOV1
Bicluster No.32	central nervous system development (GO:0007417)	SH3GL3;MOG;MAL;MBP;SOX10;HAPLN2;KLK6	myelination (GO:0042552)	MAL;MBP;SOX10;KLK6	nervous system development (GO:0007399)	SH3GL3;GJB1;MOBP;MOG;MAL;MBP;HAPLN2;KLK6	regulation of BMP signaling pathway (GO:0030510)	GREM1;LRP2;PCSK6	regulation of cAMP-mediated signaling (GO:0043949)	PEX5L;GPR62
Bicluster No.33	peroxisome organization (GO:0007031)	PEX16;FIS1;PEX10;PEX11G	protein transmembrane import into intracellular organelle (GO:0044743)	PEX16;NDUFA13;PEX10;TIMM10	respiratory electron transport chain (GO:0022904)	NDUFA13;NDUFA7;NDUFB7;UQCRQ;ETFB	mitochondrial respiratory chain complex assembly (GO:0033108)	CHCHD5;NDUFA13;NDUFA7;NDUFB7;NDUFAF3	NADH dehydrogenase complex assembly (GO:0010257)	NDUFA13;NDUFA7;NDUFB7;NDUFAF3
Bicluster No.34	vesicle-mediated transport (GO:0016192)	DNM3;KIF5A;SYT15;DOC2B;KIF1A;RAB11FIP4;CYTH1	positive regulation of nuclear-transcribed mRNA poly(A) tail shortening (GO:0060213)	TNRC6C;CPEB3	regulation of nuclear-transcribed mRNA poly(A) tail shortening (GO:0060211)	TNRC6C;CPEB3	regulation of nuclear-transcribed mRNA catabolic process, deadenylation-dependent decay (GO:1900151)	TNRC6C;CPEB3	positive regulation of nuclear-transcribed mRNA catabolic process, deadenylation-dependent decay (GO:1900153)	TNRC6C;CPEB3
Bicluster No.35	regulation of ARF protein signal transduction (GO:0032012)	AGAP6;AGAP5;AGAP4	spliceosomal complex assembly (GO:0000245)	LUC7L;LUC7L3;RBM5	inner dynein arm assembly (GO:0036159)	DNAH1;DNHD1	regulation of gene expression, epigenetic (GO:0040029)	CREBZF;KAT2A;TAF1C	regulation of Ras protein signal transduction (GO:0046578)	AGAP6;AGAP5;AGAP4
Bicluster No.36	glucose 6-phosphate metabolic process (GO:0051156)	G6PC3;PGLS	ER to Golgi vesicle-mediated transport (GO:0006888)	TRAPPC6A;TRAPPC1;TMED1;COPE	protein complex assembly (GO:0006461)	GRHPR;TRAPPC6A;TRAPPC1;IRAK1	melanosome organization (GO:0032438)	TRAPPC6A;SNAPIN	platelet aggregation (GO:0070527)	ACTB;ACTG1
Bicluster No.37	SRP-dependent cotranslational protein targeting to membrane (GO:0006614)	RPL5;RPL30;RPL3;RPL10;RPL32;RPL12;RPL11;RPL8;RPS17;RPS16;RPS15A;RPS19;RPL18A;RPS18;RPS3;RPLP2;RPS11;RPL18;RPS27A;RPS10;RPS13;RPL19;RPS7;RPS8;RPS5;RPL23;RPS6;RPL13A;RPL35A;RPL23A;RPS25;RPS28;RPS27;RPL27A;RPL24;RPL29	cotranslational protein targeting to membrane (GO:0006613)	RPL5;RPL30;RPL3;RPL10;RPL32;RPL12;RPL11;RPL8;RPS17;RPS16;RPS15A;RPS19;RPL18A;RPS18;RPS3;RPLP2;RPS11;RPL18;RPS27A;RPS10;RPS13;RPL19;RPS7;RPS8;RPS5;RPL23;RPS6;RPL13A;RPL35A;RPL23A;RPS25;RPS28;RPS27;RPL27A;RPL24;RPL29	protein targeting to ER (GO:0045047)	RPL5;RPL30;RPL3;RPL10;RPL32;RPL12;RPL11;RPL8;RPS17;RPS16;RPS15A;RPS19;RPL18A;RPS18;RPS3;RPLP2;RPS11;RPL18;RPS27A;RPS10;RPS13;RPL19;RPS7;RPS8;RPS5;RPL23;RPS6;RPL13A;RPL35A;RPL23A;RPS25;RPS28;RPS27;RPL27A;RPL24;RPL29	viral gene expression (GO:0019080)	RPL5;RPL30;RPL3;RPL10;RPL32;RPL12;RPL11;RPL8;RPS17;RPS16;RPS15A;RPS19;RPL18A;RPS18;RPS3;RPLP2;RPS11;RPL18;RPS27A;RPS10;RPS13;RPL19;RPS7;RPS8;RPS5;RPL23;RPS6;RPL13A;RPL35A;RPL23A;RPS25;RPS28;RPS27;RPL27A;RPL24;RPL29	nuclear-transcribed mRNA catabolic process, nonsense-mediated decay (GO:0000184)	RPL5;RPL30;RPL3;RPL10;RPL32;RPL12;RPL11;RPL8;RPS17;RPS16;RPS15A;RPS19;RPL18A;RPS18;RPS3;RPLP2;RPS11;RPL18;RPS27A;RPS10;RPS13;RPL19;RPS7;RPS8;RPS5;RPL23;RPS6;RPL13A;RPL35A;RPL23A;RPS25;RPS28;RPS27;RPL27A;RPL24;RPL29
Bicluster No.38	RNA-dependent DNA biosynthetic process (GO:0006278)	NHP2;PPIA;NOP10	snRNA modification (GO:0040031)	NHP2;NOP10	protein peptidyl-prolyl isomerization (GO:0000413)	FKBP1A;PPIB;PPIA	peptidyl-proline modification (GO:0018208)	FKBP1A;PPIB;PPIA	cellular protein metabolic process (GO:0044267)	PSENEN;UBL5;MRPL51;UBE2D2;NHP2;RPS2;MRPS6
Bicluster No.39	neutrophil degranulation (GO:0043312)	TYROBP;ANXA2;NPC2;GMFG;CYBA;TNFRSF1B;DOCK2;CTSC;S100A11	neutrophil activation involved in immune response (GO:0002283)	TYROBP;ANXA2;NPC2;GMFG;CYBA;TNFRSF1B;DOCK2;CTSC;S100A11	neutrophil mediated immunity (GO:0002446)	TYROBP;ANXA2;NPC2;GMFG;CYBA;TNFRSF1B;DOCK2;CTSC;S100A11	positive regulation of intracellular signal transduction (GO:1902533)	AKAP13;TGFB1;TNIP2;HMOX1;TNFRSF10B;HCLS1;TNFRSF1B;VAV1	cytokine-mediated signaling pathway (GO:0019221)	TGFB1;ANXA2;TNIP2;IL10RA;HMOX1;TNFRSF10B;TNFRSF1B;PSMB8;VAV1
Bicluster No.40	axonogenesis (GO:0007409)	BRSK2;KIF5C;KIF5A;TNR;DSCAML1	regulation of short-term neuronal synaptic plasticity (GO:0048172)	SYP;SHISA7	establishment of synaptic vesicle localization (GO:0097480)	KIF5C;KIF5A	synaptic vesicle localization (GO:0097479)	KIF5C;KIF5A	positive regulation of synaptic transmission (GO:0050806)	STX1B;PRKCZ;SHISA7
Bicluster No.41	regulation of cell development (GO:0060284)	YAP1;NOTCH2;AKAP13	regulation of intracellular signal transduction (GO:1902531)	AKAP13;PREX1;ARHGAP31;HDAC1;GNA12;TP53BP2;VAV2	positive regulation of gene expression (GO:0010628)	YAP1;SMAD3;GSN;HDAC1;ERBB2;MSN;NFATC1;RREB1;TLR4	regulation of apoptotic process (GO:0042981)	NOTCH2;AKAP13;PREX1;HDAC1;AXL;ERBB2;TP53BP2;LTBR;VAV2	interleukin-1 beta secretion (GO:0050702)	ABCA1;TLR4
Bicluster No.42	regulation of cellular component organization (GO:0051128)	KIAA1109;ZRANB1;RUFY2;PDZD8	branched-chain amino acid catabolic process (GO:0009083)	PPM1K;ACADSB	branched-chain amino acid metabolic process (GO:0009081)	PPM1K;ACADSB	cellular amino acid catabolic process (GO:0009063)	PPM1K;ACADSB	regulation of cell morphogenesis (GO:0022604)	ZRANB1;PDZD8
Bicluster No.43	translational termination (GO:0006415)	MRPS33;MRPL47;ETF1	actin polymerization or depolymerization (GO:0008154)	CAP1;TWF1	regulation of plasma membrane bounded cell projection assembly (GO:0120032)	TWF1;RAB5A	protein K48-linked ubiquitination (GO:0070936)	UBE2D2;AMFR	protein autoubiquitination (GO:0051865)	UBE2D2;AMFR
Bicluster No.44	modulation of excitatory postsynaptic potential (GO:0098815)	RIMS2;STX1B;PRKCZ;SHANK2;CBLN1	positive regulation of excitatory postsynaptic potential (GO:2000463)	RIMS2;STX1B;PRKCZ;SHANK2	regulation of synaptic vesicle exocytosis (GO:2000300)	RIMS2;STX1B;STXBP1	positive regulation of synaptic transmission (GO:0050806)	RIMS2;STX1B;PRKCZ;SHANK2	negative regulation of synaptic transmission (GO:0050805)	STXBP1;SHANK2;CBLN1
Bicluster No.45	regulation of cellular amino acid metabolic process (GO:0006521)	PSMB6;PSMB7;PSMB5;PSMD4;PSMB2;PSMC3;PSMB3	regulation of cellular amine metabolic process (GO:0033238)	PSMB6;PSMB7;PSMB5;PSMD4;PSMB2;PSMC3;PSMB3	regulation of cellular ketone metabolic process (GO:0010565)	PSMB6;PSMB7;PSMB5;PSMD4;PSMB2;PSMC3;PSMB3	negative regulation of G2/M transition of mitotic cell cycle (GO:0010972)	PSMB6;PSMB7;PSMB5;PSMD4;PSMB2;PSMC3;PSMB3	negative regulation of cell cycle G2/M phase transition (GO:1902750)	PSMB6;PSMB7;PSMB5;PSMD4;PSMB2;PSMC3;PSMB3
Bicluster No.46	cytoskeleton-dependent intracellular transport (GO:0030705)	KIF1A;DYNLL2	regulation of mitochondrial membrane potential (GO:0051881)	SLC25A27;MAPT	Wnt signaling pathway, calcium modulating pathway (GO:0007223)	GNAO1;TNRC6C	regulation of phosphatase activity (GO:0010921)	TSC1;PPP1R12B	regulation of neuron death (GO:1901214)	TSC1;MAPT
Bicluster No.47	cytokine-mediated signaling pathway (GO:0019221)	MAP3K8;IRAK3;TNFRSF10A;TRIM38;TNFRSF1B;OSMR;TRIM22;IL13RA1;HLA-E	extracellular matrix organization (GO:0030198)	VWF;ITGA1;PECAM1;ITGA6;ITGA5;HSPG2	platelet degranulation (GO:0002576)	SRGN;VWF;PECAM1;TAGLN2	positive regulation of NF-kappaB transcription factor activity (GO:0051092)	PRKCH;IRAK3;TRIM38;TRIM22	regulated exocytosis (GO:0045055)	SRGN;VWF;PECAM1;TAGLN2
Bicluster No.48	protein transport (GO:0015031)	RAB10;TMED10;LAMP2;TMED7;RAB5A;TMED5	cellular protein localization (GO:0034613)	RAB10;RAP2A;TMED10;TMED7;RAB5A;TMED5	intracellular protein transport (GO:0006886)	RAB10;TMED10;LAMP2;TMED7;RAB5A;TMED5	regulation of early endosome to late endosome transport (GO:2000641)	SNX3;RDX	protein localization to cell periphery (GO:1990778)	RAB10;RAP2A;RDX
Bicluster No.49	SRP-dependent cotranslational protein targeting to membrane (GO:0006614)	RPL32;RPLP1;RPLP0;RPL36A;RPS14;RPL7A;RPS17;RPS16;RPS19;RPS18;RPL36;RPL35;RPL38;RPS11;RPS10;RPL39;RPL19;RPS9;RPS5;RPL23;RPL35A;RPL23A;RPS25;RPS27;RPL27A;RPL37A;RPL27;RPL29;RPL28;UBA52	cotranslational protein targeting to membrane (GO:0006613)	RPL32;RPLP1;RPLP0;RPL36A;RPS14;RPL7A;RPS17;RPS16;RPS19;RPS18;RPL36;RPL35;RPL38;RPS11;RPS10;RPL39;RPL19;RPS9;RPS5;RPL23;RPL35A;RPL23A;RPS25;RPS27;RPL27A;RPL37A;RPL27;RPL29;RPL28;UBA52	protein targeting to ER (GO:0045047)	RPL32;RPLP1;RPLP0;RPL36A;RPS14;RPL7A;RPS17;RPS16;RPS19;RPS18;RPL36;RPL35;RPL38;RPS11;RPS10;RPL39;RPL19;RPS9;RPS5;RPL23;RPL35A;RPL23A;RPS25;RPS27;RPL27A;RPL37A;RPL27;RPL29;RPL28;UBA52	viral gene expression (GO:0019080)	RPL32;RPLP1;RPLP0;RPL36A;RPS14;RPL7A;RPS17;RPS16;RPS19;RPS18;RPL36;RPL35;RPL38;RPS11;RPS10;RPL39;RPL19;RPS9;RPS5;RPL23;RPL35A;RPL23A;RPS25;RPS27;RPL27A;RPL37A;RPL27;RPL29;RPL28;UBA52	nuclear-transcribed mRNA catabolic process, nonsense-mediated decay (GO:0000184)	RPL32;RPLP1;RPLP0;RPL36A;RPS14;RPL7A;RPS17;RPS16;RPS19;RPS18;RPL36;RPL35;RPL38;RPS11;RPS10;RPL39;RPL19;RPS9;RPS5;RPL23;RPL35A;RPL23A;RPS25;RPS27;RPL27A;RPL37A;RPL27;RPL29;RPL28;UBA52
Bicluster No.50	positive regulation of exosomal secretion (GO:1903543)	SDCBP;RAB7A	regulation of exosomal secretion (GO:1903541)	SDCBP;RAB7A	toll-like receptor signaling pathway (GO:0002224)	UBE2D2;HSP90B1;HSPD1	positive regulation of cysteine-type endopeptidase activity involved in apoptotic process (GO:0043280)	BCAP31;HSPE1;HSPD1	neutrophil degranulation (GO:0043312)	CAP1;SDCBP;GOLGA7;RHOA;RAB7A
Bicluster No.51	SRP-dependent cotranslational protein targeting to membrane (GO:0006614)	RPS15;RPS28;RPS16;RPL18A;RPS7;RPS5;RPL36;RPLP2;RPL13;RPL8;RPS21	cotranslational protein targeting to membrane (GO:0006613)	RPS15;RPS28;RPS16;RPL18A;RPS7;RPS5;RPL36;RPLP2;RPL13;RPL8;RPS21	protein targeting to ER (GO:0045047)	RPS15;RPS28;RPS16;RPL18A;RPS7;RPS5;RPL36;RPLP2;RPL13;RPL8;RPS21	viral gene expression (GO:0019080)	RPS15;RPS28;RPS16;RPL18A;RPS7;RPS5;RPL36;RPLP2;RPL13;RPL8;RPS21	nuclear-transcribed mRNA catabolic process, nonsense-mediated decay (GO:0000184)	RPS15;RPS28;RPS16;RPL18A;RPS7;RPS5;RPL36;RPLP2;RPL13;RPL8;RPS21

## Sheet: Brain Region Enrichment
Bicluster No.	p-value Amygdala	Number Amygdala	p-value Anterior Cingulate Cortex	Number ACC	p-value Caudate BG	Number BG	p-value Cerebellar Hemisphere	Number CH	p-value Cortex	Number Cortex	p-value Frontal Cortex (Ba9)	Number Frontal Cortex (Ba9)	p-value Hippocampus	Number Hippocampus	p-value Hypothalamus	Number Hypothamalus	p-value Nuclear Accubens	Number NA	p-value Putamen	Number Putamen	p-value Spinal Cord	Number Spinal Cord	p-value Substania Nigra	Number Substania Nigra	p-value Cerebellum	Number Cerebellum
Bicluster No.1	1	0	1	0	1	0	1.05257e-79	73	1	0	1	0	1	0	1	0	1	0	1	0	1	0	0.979727	1	2.74819e-24	43
Bicluster No.2	0.999991	1	0.999999	1	1	2	1	0	1	1	1	0	0.999999	1	1	0	1	1	0.999999	1	0.20564	12	1	0	1	0
Bicluster No.3	0.977279	2	0.909635	4	0.980185	4	1.84523e-26	44	0.746233	7	0.985708	3	0.993112	2	0.796666	5	0.991749	3	0.958995	3	0.959521	2	1	0	4.43931e-42	62
Bicluster No.4	1	0	0.879741	3	0.998927	1	1.95947e-51	56	0.988867	2	0.493919	6	0.965008	2	0.874493	3	1	0	1	0	1	0	0.970412	1	6.50283e-10	26
Bicluster No.5	1	0	1	0	1	0	6.78843e-47	55	1	0	0.998517	1	0.996786	1	1	0	0.992785	2	1	0	1	0	1	0	2.9495e-39	55
Bicluster No.6	1	0	1	0	1	0	1.23694e-64	66	1	0	1	0	1	0	1	0	1	0	1	0	1	0	1	0	6.49389e-37	54
Bicluster No.7	1	0	1	0	1	0	1.8092e-86	74	0.998696	1	1	0	1	0	1	0	1	0	1	0	1	0	1	0	8.34322e-15	32
Bicluster No.8	1	0	1	0	1	0	1.61428e-80	70	1	0	1	0	1	0	1	0	1	0	1	0	1	0	1	0	1.07126e-14	31
Bicluster No.9	1	0	1	0	1	0	1.2308e-46	52	1	0	0.996258	1	0.992736	1	1	0	1	0	1	0	1	0	1	0	2.67441e-25	41
Bicluster No.10	0.527606	6	0.410871	8	0.999955	1	8.78344e-18	37	0.544852	9	0.05427	13	0.995637	2	0.930638	4	1	0	0.917139	4	1	0	1	0	6.0832e-48	68
Bicluster No.11	0.997263	3	0.999996	1	0.999999	2	1	0	1	0	0.99999	2	0.999649	3	0.992149	5	0.999259	5	0.999326	3	0.999875	1	0.999803	1	1	0
Bicluster No.12	0.832594	3	0.996723	1	0.995313	2	1.42189e-67	67	1	0	0.273844	8	0.921628	3	1	0	0.674534	6	1	0	1	0	1	0	2.65192e-06	22
Bicluster No.13	1	0	1	0	1	0	1.56221e-69	65	1	0	1	0	1	0	1	0	1	0	1	0	1	0	1	0	1.79542e-20	37
Bicluster No.14	0.0150688	16	0.991812	5	0.728774	13	1	0	0.992417	7	0.999899	3	4.75417e-06	27	0.203613	14	0.90744	10	0.257194	13	2.5585e-53	59	1.35401e-23	40	1	0
Bicluster No.15	1	0	1	0	1	0	1	0	0.999999	1	1	0	1	0	1	0	1	0	1	0	0.00145546	16	0.99506	2	1	0
Bicluster No.16	0.989351	1	0.996186	1	0.999371	1	2.29629e-18	33	0.999168	1	0.949102	3	1	0	1	0	1	0	1	0	1	0	1	0	3.79545e-70	74
Bicluster No.17	0.951262	2	1	0	1	0	3.89169e-25	40	0.995193	2	1	0	1	0	1	0	1	0	1	0	1	0	1	0	8.5072e-71	76
Bicluster No.18	1	0	0.186855	7	0.988798	2	1.47405e-32	43	0.556388	6	0.0060101	12	1	0	0.856895	3	1	0	0.991085	1	1	0	0.966072	1	2.56144e-10	26
Bicluster No.19	0.962936	2	1	0	0.99977	1	0.0130733	13	0.00246039	16	1	0	0.987099	2	1	0	0.999631	1	0.997566	1	1	0	1	0	4.65828e-101	93
Bicluster No.20	1	0	0.998126	1	0.999754	1	1.09077e-15	32	0.631966	7	0.999263	1	0.862984	4	0.997975	1	0.999606	1	1	0	1	0	1	0	2.23555e-73	79
Bicluster No.21	0.999765	1	0.999964	1	0.999999	1	1	0	1	0	1	0	1	0	1	0	1	0	0.999941	1	1	0	1	0	1	0
Bicluster No.22	0.999708	1	0.999954	1	0.999781	3	1	0	1	0	1	0	0.999959	1	1	0	0.999996	1	0.999924	1	0.999225	1	0.998885	1	1	0
Bicluster No.23	0.787938	7	0.854393	8	0.991216	7	0.999998	1	1	0	0.689687	11	0.517548	11	0.617801	10	0.985008	7	0.200978	13	0.80044	6	0.608297	7	1	0
Bicluster No.24	0.999587	1	1	0	0.999997	1	1	0	0.999926	2	1	0	1	0	0.99992	1	1	0	0.999886	1	7.88254e-09	23	0.741663	5	1	0
Bicluster No.25	0.984585	1	0.206624	7	0.961247	3	2.86119e-33	44	0.875525	4	0.4844	6	0.994365	1	0.71852	4	1	0	1	0	1	0	0.969381	1	8.59836e-11	27
Bicluster No.26	0.999928	1	7.09968e-12	35	0.979112	8	1	0	3.37707e-36	66	3.8033e-25	53	0.000196244	23	0.359525	12	0.930616	9	0.817368	8	1	0	0.761368	6	1	1
Bicluster No.27	0.343954	7	0.712599	6	0.30406	11	8.48445e-12	30	0.386336	10	0.553611	8	0.850007	5	0.834662	5	0.779151	7	0.969279	3	0.893319	3	0.9938	1	2.49673e-28	52
Bicluster No.28	1	0	1	0	1	0	1	0	1	0	1	0	1	0	1	0	1	0	1	0	1	0	1	0	1	0
Bicluster No.29	1	0	1	0	1	0	1	0	0.999993	1	1	0	1	0	1	0	1	0	1	0	0.00232604	14	0.998216	1	1	0
Bicluster No.30	0.879753	4	0.0662832	12	0.789948	8	0.000137345	20	2.99255e-05	23	1.77942e-05	22	0.790392	6	0.62679	7	0.91995	6	0.980298	3	0.978237	2	0.995943	1	4.46148e-16	41
Bicluster No.31	0.997235	2	0.999475	2	0.999793	3	1	0	0.999997	1	0.999865	2	0.999531	2	0.99995	1	0.999608	3	0.995353	3	1	0	1	0	1	0
Bicluster No.32	1	0	1	0	1	0	1	0	1	0	1	0	1	0	1	0	1	0	1	0	1	0	1	0	1	0
Bicluster No.33	0.99059	1	0.802926	4	0.935462	4	5.28523e-15	30	0.82859	5	0.879636	4	0.921628	3	0.628677	5	0.993172	2	0.970597	2	0.912342	2	1	0	2.49566e-36	53
Bicluster No.34	0.999391	1	1	0	1	0	1	0	1	0	1	0	1	0	1	0	1	0	1	0	1	0	1	0	1	0
Bicluster No.35	0.996102	2	0.999192	2	0.998275	4	0.999978	1	1	0	0.993886	4	0.999273	2	0.994973	3	0.999353	3	0.993333	3	1	0	0.998511	1	1	0
Bicluster No.36	0.733071	4	0.556349	6	0.962029	4	8.7349e-23	39	0.985356	3	0.530375	7	0.949429	3	0.714802	5	0.947916	4	0.933084	3	0.818635	3	1	0	1.09329e-27	48
Bicluster No.37	0.995632	2	6.16074e-05	21	0.901012	8	0.937508	6	2.84669e-19	45	8.78614e-17	40	0.667438	8	0.351621	10	0.928855	7	0.973517	4	0.998822	1	0.99834	1	0.059225	18
Bicluster No.38	0.841261	3	0.997039	1	0.99955	1	6.87015e-21	36	0.976005	3	0.989868	2	1	0	0.919314	3	1	0	0.996053	1	0.917275	2	1	0	1.41372e-54	66
Bicluster No.39	0.98394	1	0.993688	1	1	0	1.27262e-25	38	0.951041	3	0.474832	6	0.994071	1	1	0	1	0	1	0	1	0	1	0	3.28224e-41	54
Bicluster No.40	0.998938	1	0.999774	1	0.999985	1	1	0	1	0	1	0	1	0	1	0	1	0	0.999658	1	0.982006	2	1	0	1	0
Bicluster No.41	1	0	0.35541	6	0.998853	1	6.00865e-28	40	0.953262	3	0.185633	8	1	0	0.959456	2	1	0	1	0	1	0	0.969381	1	6.61128e-06	20
Bicluster No.42	1	0	1	0	1	0	1	0	1	0	1	0	1	0	1	0	1	0	0.999782	1	1	0	1	0	1	0
Bicluster No.43	0.992347	1	0.997457	1	1	0	8.51372e-12	27	0.279129	9	1	0	0.98244	2	1	0	0.930575	4	0.996585	1	1	0	1	0	1.35342e-68	75
Bicluster No.44	1	0	1	0	1	0	1	0	0.999943	1	1	0	1	0	1	0	1	0	0.999317	1	0.00126447	13	0.994616	1	1	0
Bicluster No.45	0.445383	6	0.965793	3	0.488611	9	2.89206e-15	33	0.848129	6	0.984348	3	0.908717	4	0.466603	7	0.834692	6	0.955969	3	0.706547	4	0.991193	1	2.12796e-32	54
Bicluster No.46	0.999065	1	0.999807	1	0.999988	1	1	0	1	0	1	0	1	0	1	0	1	0	0.999706	1	1	0	1	0	1	0
Bicluster No.47	0.804187	3	0.970089	2	0.971192	3	1.16164e-30	43	0.998991	1	0.126462	9	0.971723	2	0.968366	2	0.179903	9	0.994203	1	1	0	1	0	1.41702e-12	30
Bicluster No.48	0.916896	2	1	0	1	0	1.27298e-05	17	0.415785	7	1	0	1	0	1	0	1	0	1	0	1	0	1	0	1.61054e-84	79
Bicluster No.49	1	0	0.0227705	12	0.993273	3	0.00146402	16	1.029e-07	25	1.13251e-06	22	0.793394	5	0.619945	6	0.999805	1	0.952738	3	0.992642	1	1	0	7.63133e-13	34
Bicluster No.50	0.940328	2	1	0	1	0	2.12423e-08	22	0.224041	9	1	0	1	0	1	0	1	0	1	0	1	0	1	0	3.98561e-83	81
Bicluster No.51	0.623203	6	0.00117353	17	0.316062	12	0.654504	8	1.26342e-06	26	2.31865e-06	24	0.684896	7	0.136335	11	0.00226477	19	0.948371	4	0.828301	4	0.975939	2	0.0219989	18
