# Supplementary material for: Cilium Expression Score Predicts Glioma Survival
Source: Front Genet. 2021 Nov 19;12:758391. doi: 10.3389/fgene.2021.758391 (PMC8640099; doi:10.3389/fgene.2021.758391)
Supplement: Supplementary file 2 [file Table3.XLSX]

## Sheet: Legend
Supplementary Table 3. Biclusters and their patient enrichments for the scRNAseq data set - GSE1117891 (high expression).
Column Header	Column Description
Gene.ID	Gene symbols of genes in biclusters
Bicluster.No	Bicluster Serial Numbers
Samples.In.Bicluster	Number of Samples in Bicluster
Samples.Per.Gene.In.Bicluster	Number of samples contributed to bicluster by the given gene
Proportion.of.Samples	Ratio of Samples Per Gene in Bicluster with respect to the total number of samples in bicluster
p.val.tumor	Hypergeometric test p-value for enrichment of tumor cells in bicluster
FDR.tumor	Adjusted p-values (FDR) obtained from the Hypergeometric tests
p.val.nontumor	Hypergeometric test p-value for enrichment of non-tumor cells in bicluster
FDR.nontumor	Adjusted p-values (FDR) obtained from the Hypergeometric tests
p.val.GS1	Hypergeometric test p-value for enrichment of cells from patient GS1 in bicluster
p.val.GS2	Hypergeometric test p-value for enrichment of cells from patient GS2 in bicluster
p.val.GS3	Hypergeometric test p-value for enrichment of cells from patient GS3 in bicluster
p.val.GS4	Hypergeometric test p-value for enrichment of cells from patient GS4 in bicluster
p.val.GS5	Hypergeometric test p-value for enrichment of cells from patient GS5 in bicluster
p.val.GS6	Hypergeometric test p-value for enrichment of cells from patient GS6 in bicluster
p.val.GS7	Hypergeometric test p-value for enrichment of cells from patient GS7 in bicluster
p.val.GS8	Hypergeometric test p-value for enrichment of cells from patient GS8 in bicluster
p.val.GS9	Hypergeometric test p-value for enrichment of cells from patient GS9 in bicluster
p.val.GS10	Hypergeometric test p-value for enrichment of cells from patient GS10 in bicluster
p.val.GS11	Hypergeometric test p-value for enrichment of cells from patient GS11 in bicluster
p.val.GS12	Hypergeometric test p-value for enrichment of cells from patient GS12 in bicluster
p.val.GS13	Hypergeometric test p-value for enrichment of cells from patient GS13 in bicluster

## Sheet: Glioma scRNAseq TuBA Results
Gene.ID	Bicluster.No	Samples.In.Bicluster	Samples.Per.Gene.In.Bicluster	Proportion.of.Samples	p.val.tumor	FDR.tumor	p.val.nontumor	FDR.nontumor	p.val.GS1	p.val.GS2	p.val.GS3	p.val.GS4	p.val.GS5	p.val.GS6	p.val.GS7	p.val.GS8	p.val.GS9	p.val.GS10	p.val.GS11	p.val.GS12	p.val.GS13
C9orf24	1	370	154	0.416216	8.45942e-16	1.25099e-13	1	1	1	0.960545	1	1	1	1	1	1	1	1	1	1	3.34189e-120
PIFO	1	370	151	0.408108	1.67918e-15	1.25099e-13	1	1	1	0.613589	1	1	1	1	1	1	1	1	1	1	7.57652e-111
C1orf194	1	370	154	0.416216	8.45942e-16	1.25099e-13	1	1	1	0.998754	1	1	1	1	1	1	1	1	1	1	2.2001e-125
C11orf88	1	370	153	0.413514	1.06319e-15	1.25099e-13	1	1	1	0.890788	1	1	1	1	1	1	1	1	1	1	5.5515e-117
CAPS	1	370	145	0.391892	6.60859e-15	3.13307e-13	1	1	1	0.0406558	1	1	1	1	1	1	1	1	1	1	6.11576e-96
MORN5	1	370	152	0.410811	1.33618e-15	1.25099e-13	1	1	1	0.998639	1	1	1	1	1	1	1	1	1	1	1.14271e-123
AK1	1	370	154	0.416216	8.45942e-16	1.25099e-13	1	1	1	1	1	1	1	1	1	1	1	1	1	1	2.27738e-128
CFAP126	1	370	154	0.416216	8.45942e-16	1.25099e-13	1	1	1	0.469995	1	1	1	1	1	1	1	1	1	1	3.00162e-111
FAM183A	1	370	154	0.416216	8.45942e-16	1.25099e-13	1	1	1	1	1	1	1	1	1	1	1	1	1	1	2.27738e-128
RSPH1	1	370	154	0.416216	8.45942e-16	1.25099e-13	1	1	1	0.998754	1	1	1	1	1	1	1	1	1	1	2.2001e-125
TMEM190	1	370	151	0.408108	1.67918e-15	1.25099e-13	1	1	1	1	1	1	1	1	1	1	1	1	1	1	8.71125e-126
DNALI1	1	370	146	0.394595	5.26001e-15	2.7431e-13	1	1	1	0.986612	1	1	1	1	1	1	1	1	1	1	7.01767e-116
ROPN1L	1	370	147	0.397297	4.18645e-15	2.29814e-13	1	1	1	0.0889478	1	1	1	1	1	1	1	1	1	1	1.84681e-99
DYNLRB2	1	370	153	0.413514	1.06319e-15	1.25099e-13	1	1	1	0.192669	1	1	1	1	1	1	1	1	1	1	2.33439e-106
TCTEX1D1	1	370	152	0.410811	1.33618e-15	1.25099e-13	1	1	1	0.0111053	1	1	1	1	1	1	1	1	1	1	5.33576e-98
DRC1	1	370	145	0.391892	2.52235e-13	4.9638e-12	1	1	1	0.8649	1	1	1	0.999838	1	1	1	1	1	1	5.60599e-108
SPATA17	1	370	141	0.381081	1.64593e-14	6.1311e-13	1	1	1	0.850098	1	1	1	1	1	1	1	1	1	1	7.5343e-107
LOC102725191	1	370	150	0.405405	8.33291e-14	2.06934e-12	1	1	1	0.0499049	1	1	1	0.999881	1	1	1	1	1	1	3.4838e-98
FOLR1	1	370	151	0.408108	1.67918e-15	1.25099e-13	1	1	1	0.101769	1	1	1	1	1	1	1	1	1	1	9.33571e-103
SPAG8	1	370	141	0.381081	1.64593e-14	6.1311e-13	1	1	1	0.940158	1	1	1	1	1	1	1	1	1	1	3.55021e-109
CCDC146	1	370	148	0.4	3.33186e-15	2.04419e-13	1	1	1	0.751388	1	1	1	1	1	1	1	1	1	1	1.68643e-110
CFAP77	1	370	145	0.391892	6.60859e-15	3.13307e-13	1	1	1	0.0183053	1	1	1	1	1	1	1	1	1	1	4.17515e-94
C1orf158	1	370	146	0.394595	3.8582e-12	4.48816e-11	1	1	1	0.269402	1	1	1	0.998452	1	1	1	1	1	1	1.22702e-98
CFAP161	1	370	139	0.375676	2.59689e-14	8.46422e-13	1	1	1	0.365909	1	1	1	1	1	1	1	1	1	1	9.5009e-99
TEKT1	1	370	143	0.386486	3.92595e-13	6.93868e-12	1	1	1	0.0373147	1	1	1	0.999817	1	1	1	1	1	1	1.76677e-92
CFAP206	1	370	139	0.375676	9.50075e-13	1.43613e-11	1	1	1	0.129004	1	1	1	0.999767	1	1	1	1	1	1	6.71823e-93
CFAP53	1	370	141	0.381081	1.64593e-14	6.1311e-13	1	1	1	0.850098	1	1	1	1	1	1	1	1	1	1	7.5343e-107
FAM216B	1	370	141	0.381081	1.64593e-14	6.1311e-13	1	1	1	0.850098	1	1	1	1	1	1	1	1	1	1	7.5343e-107
FAM92B	1	370	132	0.356757	1.27942e-13	2.76313e-12	1	1	1	0.920761	1	1	1	1	1	1	1	1	1	1	1.3592e-101
C9orf116	1	370	147	0.397297	4.18645e-15	2.29814e-13	1	1	1	3.73535e-05	1	1	1	1	1	1	1	1	1	1	2.04164e-85
TPPP3	1	370	125	0.337838	2.06997e-11	1.81427e-10	1	1	1	0.776753	1	1	1	0.99518	1	1	1	1	1	1	3.25381e-89
CFAP73	1	370	138	0.372973	1.18471e-12	1.6698e-11	1	1	1	0.063867	1	1	1	1	1	1	1	1	1	1	4.40895e-92
DRC7	1	370	138	0.372973	1.18471e-12	1.6698e-11	1	1	1	0.063867	1	1	1	1	1	1	1	1	1	1	4.40895e-92
EFCAB10	1	370	140	0.378378	7.6184e-13	1.22246e-11	1	1	1	0.53874	1	1	1	0.999781	1	1	1	1	1	1	1.40792e-99
PRDX5	1	370	132	0.356757	1.27942e-13	2.76313e-12	1	1	1	1	1	1	1	1	1	1	1	1	1	1	1.59575e-109
FAM81B	1	370	146	0.394595	2.02153e-13	4.13422e-12	1	1	1	0.868399	1	1	1	0.999848	1	1	1	1	1	1	8.10291e-109
EFCAB1	1	370	143	0.386486	1.04303e-14	4.72992e-13	1	1	1	0.0165656	1	1	1	1	1	1	1	1	1	1	1.76677e-92
WDR63	1	370	139	0.375676	2.59689e-14	8.46422e-13	1	1	1	0.000668114	1	1	1	1	1	1	1	1	1	1	5.04425e-84
C1orf141	1	370	139	0.375676	2.59689e-14	8.46422e-13	1	1	1	0.93627	1	1	1	1	1	1	1	1	1	1	1.73363e-107
CCDC153	1	370	134	0.362162	8.11392e-14	2.06934e-12	1	1	1	0.0102366	1	1	1	1	1	1	1	1	1	1	3.39339e-85
LRRIQ1	1	370	144	0.389189	3.14699e-13	5.65915e-12	1	1	1	0.000318621	1	1	1	1	1	1	1	1	1	1	2.47564e-86
SPAG17	1	370	138	0.372973	3.26171e-14	1.00058e-12	1	1	1	0.00183222	1	1	1	1	1	1	1	1	1	1	6.33647e-85
VWA3A	1	370	142	0.383784	9.08875e-12	9.38571e-11	1	1	1	1.97441e-11	1	1	1	0.999806	0.999503	1	1	1	1	1	3.22003e-65
CCDC65	1	370	138	0.372973	3.26171e-14	1.00058e-12	1	1	1	0.0298151	1	1	1	1	1	1	1	1	1	1	3.11523e-90
DYDC2	1	370	140	0.378378	2.06748e-14	7.43581e-13	1	1	1	6.85569e-05	1	1	1	1	1	1	1	1	1	1	1.66975e-81
C11orf70	1	370	127	0.343243	3.99157e-13	6.93868e-12	1	1	1	0.972747	1	1	1	1	1	1	1	1	1	1	8.43027e-100
RSPH4A	1	370	135	0.364865	2.2958e-12	2.92015e-11	1	1	1	0.338233	1	1	1	0.999703	0.999274	1	1	1	1	1	1.61694e-91
ZBBX	1	370	141	0.381081	1.37321e-10	9.42273e-10	1	1	1	2.67863e-12	1	1	1	0.997967	1	1	1	1	1	1	3.9445e-63
FHAD1	1	370	141	0.381081	1.64593e-14	6.1311e-13	1	1	1	0.997793	1	1	1	1	1	1	1	1	1	1	2.88104e-114
CFAP52	1	370	144	0.389189	3.14699e-13	5.65915e-12	1	1	1	1.9355e-06	1	1	1	0.999828	1	1	1	1	1	1	2.60748e-78
SPA17	1	370	133	0.359459	1.0189e-13	2.36158e-12	1	1	1	0.00128336	1	1	1	1	1	1	1	1	1	1	6.26425e-81
ANKRD66	1	370	134	0.362162	8.11392e-14	2.06934e-12	1	1	1	0.669284	1	1	1	1	1	1	1	1	1	1	8.95697e-99
CFAP100	1	370	142	0.383784	4.8973e-13	8.37358e-12	1	1	1	6.18525e-06	1	1	1	0.999806	1	1	1	1	1	1	2.67286e-78
C7orf57	1	370	130	0.351351	6.90212e-12	7.34583e-11	1	1	1	0.802255	1	1	1	0.999597	1	1	1	1	1	1	1.91458e-95
HYDIN	1	370	139	0.375676	2.07515e-10	1.33604e-09	1	1	1	0.000211623	1	1	1	0.997734	1	1	1	1	1	1	4.20456e-79
CASC1	1	370	133	0.359459	3.5668e-12	4.22747e-11	1	1	1	0.194731	1	1	1	0.999664	1	1	1	1	1	1	6.99234e-90
CETN2	1	370	134	0.362162	8.11392e-14	2.06934e-12	1	1	1	1.32333e-07	1	1	1	1	1	1	1	1	1	1	1.4108e-70
PPP1R42	1	370	128	0.345946	1.07129e-11	1.04425e-10	1	1	1	0.000273586	1	1	1	0.999545	0.998939	1	1	1	1	1	4.43113e-72
LOC388780	1	370	136	0.367568	5.14488e-14	1.53317e-12	1	1	1	0.980497	1	1	1	1	0.999312	1	1	1	1	1	5.86373e-105
DRC3	1	370	120	0.324324	1.95954e-12	2.58709e-11	1	1	1	0.0116119	1	1	1	0.99926	1	1	1	1	1	1	5.47367e-74
LRRC46	1	370	128	0.345946	1.07129e-11	1.04425e-10	1	1	1	2.13026e-05	1	1	1	0.999545	1	1	1	1	1	1	1.62517e-70
SPEF1	1	370	127	0.343243	2.21398e-10	1.40804e-09	1	1	1	5.21961e-11	1	1	1	0.999516	1	1	1	1	1	1	3.48537e-58
C11orf97	1	370	120	0.324324	1.95954e-12	2.58709e-11	1	1	1	0.886035	1	1	1	1	1	1	1	1	1	1	1.51015e-91
FAM74A3	1	370	133	0.359459	3.5668e-12	4.22747e-11	1	1	1	1	1	1	1	0.999664	1	1	1	1	1	1	1.82614e-107
PRR29	1	370	125	0.337838	2.06997e-11	1.81427e-10	1	1	1	0.00211807	1	1	1	1	0.998753	1	1	1	1	1	1.40063e-74
RIBC1	1	370	131	0.354054	5.53933e-12	6.14629e-11	1	1	1	0.0479006	1	1	1	0.999621	1	1	1	1	1	1	1.46503e-84
C6orf118	1	370	125	0.337838	2.06997e-11	1.81427e-10	1	1	1	0.428323	1	1	1	0.999454	0.998753	1	1	1	1	1	2.94665e-85
CFAP221	1	370	136	0.367568	1.84162e-12	2.49456e-11	1	1	1	1.37318e-09	1	1	1	0.99972	1	1	1	1	1	1	2.81136e-66
MAP3K19	1	370	138	0.372973	2.13636e-11	1.82641e-10	1	1	1	5.92153e-11	1	1	1	0.988412	1	1	1	1	1	1	2.94446e-62
GABRG1	1	370	120	0.324324	9.70733e-10	5.13946e-09	1	1	1	1	1	1	1	0.993707	0.998366	1	1	1	1	1	1.51015e-91
WDR38	1	370	129	0.348649	8.59935e-12	8.96912e-11	1	1	1	0.0916746	1	1	1	0.999572	1	1	1	1	1	1	9.26813e-85
FAM179A	1	370	133	0.359459	1.0189e-13	2.36158e-12	1	1	1	0.662798	1	1	1	1	1	1	1	1	1	1	6.10221e-98
KIF9	1	370	123	0.332432	9.911e-13	1.45594e-11	1	1	1	0.000588691	1	1	1	1	1	1	1	1	1	1	5.31128e-73
CCDC39	1	370	128	0.345946	1.07129e-11	1.04425e-10	1	1	1	3.75169e-10	1	1	1	0.999545	1	1	1	1	1	1	2.73074e-60
DNAH12	1	370	119	0.321622	1.23219e-08	4.75992e-08	1	1	1	0.00135134	1	1	1	0.971835	1	1	1	1	1	1	1.18329e-66
FOXJ1	1	370	121	0.327027	4.97453e-11	3.81503e-10	1	1	1	0.244829	1	1	1	0.994033	1	1	1	1	1	1	4.00813e-80
NME5	1	370	113	0.305405	9.59987e-12	9.81634e-11	1	1	1	0.00752065	1	1	1	1	1	1	1	1	1	1	3.82538e-70
UBXN10	1	370	115	0.310811	6.09793e-12	6.62515e-11	1	1	1	4.4625e-08	1	1	1	1	1	1	1	1	1	1	1.34699e-57
MORN2	1	370	112	0.302703	3.5545e-10	2.14555e-09	1	1	1	0.044922	1	1	1	0.998798	0.997483	1	1	1	1	1	2.37702e-69
UBXN11	1	370	106	0.286486	4.6933e-11	3.68053e-10	1	1	1	0.828976	1	1	1	1	1	1	1	1	1	1	6.36053e-80
BAIAP3	1	370	105	0.283784	1.63007e-09	7.79891e-09	1	1	1	0.939402	1	1	1	0.998164	1	1	1	1	1	1	4.26379e-79
PPP1R32	1	370	104	0.281081	7.38297e-11	5.31065e-10	1	1	1	0.819088	1	1	1	1	1	1	1	1	1	1	2.85467e-78
ATG9B	1	370	107	0.289189	1.05558e-09	5.53251e-09	1	1	1	0.292641	1	1	1	1	1	1	1	1	1	1	1.77886e-74
NNAT	1	370	97	0.262162	3.59992e-10	2.14555e-09	1	1	1	1	1	1	1	1	1	1	1	1	1	1	5.58711e-80
PPIL6	1	370	124	0.335135	7.8959e-13	1.22917e-11	1	1	1	3.37751e-06	1	1	1	0.99942	1	1	1	1	1	1	6.6549e-66
WDR93	1	370	114	0.308108	2.29792e-10	1.44382e-09	1	1	1	0.000267383	1	1	1	0.998936	1	1	1	1	1	1	2.39359e-64
CAPSL	1	370	126	0.340541	1.6621e-11	1.56177e-10	1	1	1	9.88497e-07	1	1	1	0.995431	0.998818	1	1	1	1	1	5.15795e-63
SLC47A2	1	370	104	0.281081	7.38297e-11	5.31065e-10	1	1	1	0.819088	1	1	1	1	1	1	1	1	1	1	2.85467e-78
DNAAF1	1	370	116	0.313514	4.85975e-12	5.45023e-11	1	1	1	5.57616e-06	1	1	1	1	1	1	1	1	1	1	8.59794e-63
ANKUB1	1	370	115	0.310811	6.09793e-12	6.62515e-11	1	1	1	0.867941	1	1	1	1	1	1	1	1	1	1	2.20072e-87
RIIAD1	1	370	117	0.316216	3.87281e-12	4.48816e-11	1	1	1	0.00349182	1	1	1	0.999113	1	1	1	1	1	1	6.28734e-70
CFAP43	1	370	121	0.327027	4.97453e-11	3.81503e-10	1	1	1	6.69616e-10	1	1	1	1	1	1	1	1	1	1	7.51658e-58
SPEF2	1	370	114	0.308108	3.42297e-09	1.49265e-08	1	1	1	3.82871e-08	1	1	1	0.998936	1	1	1	1	1	1	1.9839e-55
C21orf59	1	370	104	0.281081	7.38297e-11	5.31065e-10	1	1	1	0.937206	1	1	1	1	1	1	1	1	1	1	1.42237e-80
EFHC1	1	370	116	0.313514	4.85975e-12	5.45023e-11	1	1	1	0.213648	1	1	1	1	1	1	1	1	1	1	7.54692e-80
IQCG	1	370	114	0.308108	7.65126e-12	8.06088e-11	1	1	1	0.00802346	1	1	1	1	1	1	1	1	1	1	6.14445e-71
CCDC170	1	370	111	0.3	4.42002e-10	2.58659e-09	1	1	1	0.000700681	1	1	1	1	1	1	1	1	1	1	3.2311e-65
LRTOMT	1	370	100	0.27027	1.82608e-10	1.19037e-09	1	1	1	0.797858	1	1	1	1	1	1	1	1	1	1	5.66394e-75
C5orf49	1	370	116	0.313514	1.48489e-10	9.99188e-10	1	1	1	2.3164e-05	1	1	1	0.992219	0.997972	1	1	1	1	1	8.38815e-60
DTHD1	1	370	119	0.321622	2.45922e-12	3.09032e-11	1	1	1	4.72768e-10	1	1	1	1	1	1	1	1	1	1	2.30375e-56
LRRC71	1	370	105	0.283784	5.88659e-11	4.44907e-10	1	1	1	0.824091	1	1	1	1	1	1	1	1	1	1	4.26379e-79
CCDC113	1	370	107	0.289189	3.74174e-11	3.04894e-10	1	1	1	0.035046	1	1	1	1	1	1	1	1	1	1	7.1916e-69
TEKT2	1	370	109	0.294595	2.37799e-11	2.01646e-10	1	1	1	0.947481	1	1	1	1	1	1	1	1	1	1	9.89851e-85
FBXO15	1	370	104	0.281081	7.38297e-11	5.31065e-10	1	1	1	0.819088	1	1	1	1	1	1	1	1	1	1	2.85467e-78
MDH1B	1	370	112	0.302703	1.20442e-11	1.15249e-10	1	1	1	0.000221522	1	1	1	0.998798	0.997483	1	1	1	1	1	3.00944e-61
SAMD15	1	370	111	0.3	1.51104e-11	1.43274e-10	1	1	1	0.501312	1	1	1	1	1	1	1	1	1	1	9.39587e-80
DNAI1	1	370	108	0.291892	8.49285e-10	4.61356e-09	1	1	1	0.670839	1	1	1	0.998469	1	1	1	1	1	1	2.69647e-77
LRRC23	1	370	103	0.278378	2.51595e-09	1.15094e-08	1	1	1	0.0667713	1	1	1	0.997928	1	1	1	1	1	1	1.10795e-65
MORN3	1	370	100	0.27027	1.82608e-10	1.19037e-09	1	1	1	0.125956	1	1	1	1	1	1	1	1	1	1	6.60173e-67
TTC25	1	370	106	0.286486	4.6933e-11	3.68053e-10	1	1	1	0.0332677	1	1	1	1	1	1	1	1	1	1	4.51804e-68
CFAP57	1	370	104	0.281081	7.38297e-11	5.31065e-10	1	1	1	0.0299008	1	1	1	1	0.996126	1	1	1	1	1	9.85573e-65
TTC29	1	370	107	0.289189	3.74174e-11	3.04894e-10	1	1	1	0.663659	1	1	1	1	1	1	1	1	1	1	1.45742e-78
ANKRD18CP	1	370	103	0.278378	2.51595e-09	1.15094e-08	1	1	1	0.00372865	1	1	1	0.997928	1	1	1	1	1	1	1.34194e-60
C10orf105	1	370	110	0.297297	1.89562e-11	1.71925e-10	1	1	1	0.01664	1	1	1	0.998644	1	1	1	1	1	1	9.12484e-68
RUVBL1	1	370	95	0.256757	5.65872e-10	3.15617e-09	1	1	1	0.913767	1	1	1	1	1	1	1	1	1	1	4.02284e-73
PIH1D2	1	370	100	0.27027	1.82608e-10	1.19037e-09	1	1	1	0.0238971	1	1	1	1	1	1	1	1	1	1	2.6714e-63
NEK11	1	370	112	0.302703	1.20442e-11	1.15249e-10	1	1	1	0.00704277	1	1	1	0.998798	1	1	1	1	1	1	1.17782e-67
CFAP54	1	370	110	0.297297	5.49565e-10	3.13222e-09	1	1	1	5.57836e-07	1	1	1	0.989325	1	1	1	1	1	1	7.47932e-54
WDR78	1	370	106	0.286486	4.6933e-11	3.68053e-10	1	1	1	0.000447631	1	1	1	0.998272	1	1	1	1	1	1	9.94852e-60
IFT22	1	370	96	0.259459	4.51351e-10	2.58659e-09	1	1	1	0.916728	1	1	1	1	1	1	1	1	1	1	6.00662e-74
RSPH9	1	370	110	0.297297	1.89562e-11	1.71925e-10	1	1	1	2.64274e-06	1	1	1	1	1	1	1	1	1	1	3.32954e-58
EFHC2	1	370	109	0.294595	6.83223e-10	3.79043e-09	1	1	1	0.000165469	1	1	1	0.998559	1	1	1	1	1	1	1.75466e-60
IGFBP7-AS1	1	370	113	0.305405	2.85813e-10	1.76152e-09	1	1	1	0.000243525	1	1	1	0.998869	1	1	1	1	1	1	1.42594e-63
CCDC74A	1	370	100	0.27027	1.82608e-10	1.19037e-09	1	1	1	0.986737	1	1	1	1	1	1	1	1	1	1	1.013e-79
CCDC74B	1	370	93	0.251351	8.89345e-10	4.75686e-09	1	1	1	0.755751	1	1	1	1	1	1	1	1	1	1	3.18025e-69
EPPK1	1	370	104	0.281081	7.38297e-11	5.31065e-10	1	1	1	1	1	1	1	1	1	1	1	1	1	1	7.59204e-86
RARRES2	1	370	107	0.289189	3.74174e-11	3.04894e-10	1	1	1	1	1	1	1	1	1	1	1	1	1	1	2.28898e-88
C14orf180	1	370	95	0.256757	5.65872e-10	3.15617e-09	1	1	1	1	1	1	1	1	1	1	1	1	1	1	2.62801e-78
IFT57	1	370	97	0.262162	9.22183e-09	3.69937e-08	1	1	1	0.111984	1	1	1	0.997021	1	1	1	1	1	1	1.10122e-62
TCTEX1D4	1	370	93	0.251351	8.89345e-10	4.75686e-09	1	1	1	0.982007	1	1	1	1	1	1	1	1	1	1	6.69465e-74
TSNAXIP1	1	370	100	0.27027	4.81972e-09	2.03521e-08	1	1	1	0.0029576	1	1	1	0.997515	1	1	1	1	1	1	2.90358e-58
TTC26	1	370	96	0.259459	4.51351e-10	2.58659e-09	1	1	1	0.214746	1	1	1	1	1	1	1	1	1	1	1.41977e-65
DCDC2	1	370	105	0.283784	1.63007e-09	7.79891e-09	1	1	1	2.70884e-07	1	1	1	0.998164	1	1	1	1	1	1	1.55123e-51
IFT46	1	370	97	0.262162	3.59992e-10	2.14555e-09	1	1	1	0.00232055	1	1	1	1	1	1	1	1	1	1	1.48283e-57
AGBL2	1	370	96	0.259459	4.51351e-10	2.58659e-09	1	1	1	0.10752	1	1	1	1	1	1	1	1	1	1	1.06254e-63
DOC2A	1	370	98	0.264865	2.87113e-10	1.76152e-09	1	1	1	0.00251914	1	1	1	1	1	1	1	1	1	1	2.46159e-58
MLF1	1	370	103	0.278378	3.38879e-08	1.17817e-07	1	1	1	0.813965	1	1	1	0.984612	0.995912	1	1	1	1	1	3.13922e-71
TCTEX1D2	1	370	102	0.275676	1.16121e-10	8.0743e-10	1	1	1	0.135741	1	1	1	1	1	1	1	1	1	1	1.62871e-68
DNAI2	1	370	99	0.267568	2.28979e-10	1.44382e-09	1	1	1	0.986146	1	1	1	1	1	1	1	1	1	1	6.8937e-79
LRRC6	1	370	102	0.275676	3.12511e-09	1.38702e-08	1	1	1	0.0101125	1	1	1	0.983792	1	1	1	1	1	1	8.07447e-60
EFCAB12	1	370	104	0.281081	7.38297e-11	5.31065e-10	1	1	1	0.0698439	1	1	1	0.998049	1	1	1	1	1	1	1.77339e-66
TEX26	1	370	100	0.27027	4.81972e-09	2.03521e-08	1	1	1	0.0580642	1	1	1	0.997515	1	1	1	1	1	1	2.6714e-63
C4orf47	1	370	101	0.272973	1.45621e-10	9.86252e-10	1	1	1	7.15245e-05	1	1	1	1	1	1	1	1	1	1	7.02964e-56
TUBB4B	1	370	79	0.213514	2.09653e-08	7.67258e-08	1	1	1	0.966924	1	1	1	1	1	1	1	1	1	1	2.49396e-62
CFAP70	1	370	99	0.267568	5.98429e-09	2.46704e-08	1	1	1	0.0225419	1	1	1	0.99736	1	1	1	1	1	1	8.67266e-61
CCDC81	1	370	89	0.240541	5.17049e-08	1.7012e-07	1	1	1	0.0118688	1	1	1	1	1	1	1	1	1	1	1.24428e-54
CEP126	1	370	96	0.259459	4.51351e-10	2.58659e-09	1	1	1	0.00213485	1	1	1	0.996835	1	1	1	1	1	1	3.65163e-55
IQCD	1	370	90	0.243243	1.75171e-09	8.34262e-09	1	1	1	0.17575	1	1	1	1	0.991772	1	1	1	1	1	6.50456e-59
BBOF1	1	370	89	0.240541	2.19562e-09	1.02233e-08	1	1	1	0.517441	1	1	1	1	1	1	1	1	1	1	7.43089e-64
CDHR4	1	370	92	0.248649	1.11486e-09	5.69998e-09	1	1	1	0.981207	1	1	1	1	1	1	1	1	1	1	4.52173e-73
LOC100129027	1	370	94	0.254054	1.76224e-08	6.59652e-08	1	1	1	0.762169	1	1	1	0.996429	1	1	1	1	1	1	6.38966e-68
SPATA18	1	370	88	0.237838	2.7519e-09	1.24252e-08	1	1	1	1	1	1	1	1	1	1	1	1	1	1	1.81959e-72
CCDC40	1	370	91	0.245946	1.39749e-09	6.81115e-09	1	1	1	0.00137838	1	1	1	1	1	1	1	1	1	1	6.75097e-53
DNAH6	1	370	102	0.275676	4.16886e-08	1.41633e-07	1	1	1	1.71601e-07	1	1	1	0.983792	0.995686	1	1	1	1	1	1.41024e-46
LOC100506990	1	370	86	0.232432	4.32246e-09	1.84013e-08	1	1	1	2.19871e-06	1	1	1	1	1	1	1	1	1	1	4.56205e-43
PACRG	1	370	87	0.235135	7.94414e-08	2.58123e-07	1	1	1	0.714301	1	1	1	0.99455	1	1	1	1	1	1	3.11039e-62
NUDC	1	370	87	0.235135	3.44898e-09	1.49265e-08	1	1	1	0.976639	1	1	1	1	1	1	1	1	1	1	6.25381e-69
VWA3B	1	370	92	0.248649	1.11486e-09	5.69998e-09	1	1	1	0.543873	1	1	1	1	1	1	1	1	1	1	2.71387e-66
ANKRD45	1	370	92	0.248649	3.26752e-07	9.65446e-07	1	1	1	0.00493307	1	1	1	0.972887	1	1	1	1	1	1	4.41811e-52
C15orf65	1	370	81	0.218919	1.33554e-08	5.12122e-08	1	1	1	0.443847	1	1	1	1	1	1	1	1	1	1	2.1997e-57
KLHDC9	1	370	94	0.254054	1.76224e-08	6.59652e-08	1	1	1	0.0429083	1	1	1	0.996429	1	1	1	1	1	1	1.47311e-58
PALMD	1	370	94	0.254054	1.76224e-08	6.59652e-08	1	1	1	0.561077	1	1	1	0.996429	0.993364	1	1	1	1	1	5.77696e-64
PGAM2	1	370	91	0.245946	4.00912e-07	1.17458e-06	1	1	1	0.0136151	1	1	1	0.97147	1	1	1	1	1	1	6.75097e-53
ODF3B	1	370	76	0.205405	4.12223e-08	1.40506e-07	1	1	1	0.624737	1	1	1	1	1	1	1	1	1	1	2.22035e-55
SPAG1	1	370	100	0.27027	1.82608e-10	1.19037e-09	1	1	1	5.59645e-10	1	1	1	1	1	1	1	1	1	1	4.02359e-45
SCN4B	1	370	87	0.235135	3.44898e-09	1.49265e-08	1	1	1	0.886293	1	1	1	0.99455	1	1	1	1	1	1	2.56003e-64
B9D1	1	370	79	0.213514	2.09653e-08	7.67258e-08	1	1	1	0.0470183	1	1	1	1	1	1	1	1	1	1	3.24699e-50
CCDC181	1	370	85	0.22973	5.41692e-09	2.242e-08	1	1	1	0.481148	1	1	1	1	1	1	1	1	1	1	1.29416e-60
GMPR	1	370	89	0.240541	5.17049e-08	1.7012e-07	1	1	1	0.728686	1	1	1	0.99517	0.991318	1	1	1	1	1	7.31548e-62
MNS1	1	370	91	0.245946	1.39749e-09	6.81115e-09	1	1	1	2.17024e-05	1	1	1	1	1	1	1	1	1	1	2.89121e-48
LINC00880	1	370	89	0.240541	2.19562e-09	1.02233e-08	1	1	1	0.317932	1	1	1	1	1	1	1	1	1	1	7.31548e-62
TEKT4	1	370	77	0.208108	3.29059e-08	1.15171e-07	1	1	1	0.22103	1	1	1	1	1	1	1	1	1	1	3.04289e-52
ANXA1	1	370	91	0.245946	1.39749e-09	6.81115e-09	1	1	1	0.334683	1	1	1	1	1	1	1	1	1	1	1.7822e-63
MAATS1	1	370	96	0.259459	1.14453e-08	4.47096e-08	1	1	1	4.02736e-05	1	1	1	0.996835	1	1	1	1	1	1	1.46906e-50
C8orf34	1	370	96	0.259459	1.14453e-08	4.47096e-08	1	1	1	0.000165124	1	1	1	0.977907	0.994041	1	1	1	1	1	4.28071e-49
CFB	1	370	87	0.235135	3.44898e-09	1.49265e-08	1	1	1	0.886293	1	1	1	1	1	1	1	1	1	1	1.55974e-66
LINC01732	1	370	89	0.240541	5.17049e-08	1.7012e-07	1	1	1	0.517441	1	1	1	0.99517	1	1	1	1	1	1	7.31548e-62
COL21A1	1	370	91	0.245946	1.39749e-09	6.81115e-09	1	1	1	1	1	1	1	1	1	1	1	1	1	1	5.74744e-75
LCA5L	1	370	83	0.224324	8.50631e-09	3.45217e-08	1	1	1	0.26849	1	1	1	0.993062	1	1	1	1	1	1	3.63449e-55
LOC145694	1	370	87	0.235135	9.06153e-07	2.51361e-06	1	1	1	0.0102956	1	1	1	0.99455	1	1	1	1	1	1	2.04281e-51
LRRC10B	1	370	94	0.254054	1.76224e-08	6.59652e-08	1	1	1	0.000511675	1	1	1	1	1	1	1	1	1	1	1.27649e-53
PAMR1	1	370	89	0.240541	6.03063e-07	1.71388e-06	1	1	1	0.169554	1	1	1	0.968419	0.991318	1	1	1	1	1	1.24428e-54
WDR66	1	370	91	0.245946	1.39749e-09	6.81115e-09	1	1	1	8.50931e-11	1	1	1	1	1	1	1	1	1	1	1.18556e-38
ZMYND10	1	370	149	0.402703	2.6516e-15	1.72851e-13	1	1	1	0.435496	1	1	1	1	1	1	1	1	1	1	4.55984e-107
CCDC103	1	370	107	0.289189	1.47646e-08	5.64085e-08	1	1	1	1.24156e-08	1	1	1	0.951669	1	1	1	1	1	1	1.4739e-47
SPATA4	1	370	79	0.213514	2.09653e-08	7.67258e-08	1	1	1	0.0470183	1	1	1	1	1	1	1	1	1	1	3.24699e-50
TUBA4B	1	370	85	0.22973	5.41692e-09	2.242e-08	1	1	1	1	1	1	1	1	1	1	1	1	1	1	5.71119e-70
BEST4	1	370	94	0.254054	7.0942e-10	3.87395e-09	1	1	1	0.359942	1	1	1	1	1	1	1	1	1	1	6.69699e-66
C9orf135	1	370	84	0.227027	6.78822e-09	2.77651e-08	1	1	1	0.691636	1	1	1	1	1	1	1	1	1	1	7.13222e-62
MYLK3	1	370	81	0.218919	1.33554e-08	5.12122e-08	1	1	1	1	1	1	1	1	1	1	1	1	1	1	1.20208e-66
CFAP58	1	370	89	0.240541	5.17049e-08	1.7012e-07	1	1	1	0.893835	1	1	1	1	1	1	1	1	1	1	3.54049e-68
DNAJB13	1	370	89	0.240541	2.19562e-09	1.02233e-08	1	1	1	7.47886e-05	1	1	1	1	1	1	1	1	1	1	2.99724e-48
LRRC9	1	370	88	0.237838	6.40949e-08	2.10223e-07	1	1	1	0.309596	1	1	1	0.994869	1	1	1	1	1	1	3.73685e-59
C4orf22	1	370	78	0.210811	2.62662e-08	9.38206e-08	1	1	1	0.41536	1	1	1	1	0.984329	1	1	1	1	1	4.85121e-53
MGST1	1	370	87	0.235135	3.44898e-09	1.49265e-08	1	1	1	1	1	1	1	1	1	1	1	1	1	1	1.23777e-71
NPHP1	1	370	90	0.243243	4.91772e-07	1.40526e-06	1	1	1	0.17575	1	1	1	0.899649	1	1	1	1	1	1	2.0485e-55
NAXE	1	370	75	0.202703	5.16384e-08	1.7012e-07	1	1	1	1	1	1	1	1	1	1	1	1	1	1	1.12819e-61
PPP4R3A	1	370	77	0.208108	3.29059e-08	1.15171e-07	1	1	1	0.633613	1	1	1	1	1	1	1	1	1	1	3.44313e-56
DYNLT1	1	370	77	0.208108	3.29059e-08	1.15171e-07	1	1	1	0.840647	1	1	1	1	1	1	1	1	1	1	2.40333e-58
FAM229B	1	370	78	0.210811	2.62662e-08	9.38206e-08	1	1	1	0.10817	1	1	1	1	1	1	1	1	1	1	3.37362e-51
CALML4	1	370	73	0.197297	8.10215e-08	2.62439e-07	1	1	1	0.818145	1	1	1	1	1	1	1	1	1	1	4.37007e-55
CATSPERD	1	370	81	0.218919	2.86986e-07	8.57668e-07	1	1	1	1	1	1	1	0.992173	1	1	1	1	1	1	5.61774e-64
LRP2BP	1	370	83	0.224324	1.87163e-07	5.82721e-07	1	1	1	0.000632375	1	1	1	0.957268	1	1	1	1	1	1	1.01846e-43
FRMPD2	1	370	91	0.245946	1.39749e-09	6.81115e-09	1	1	1	6.21529e-10	1	1	1	1	1	1	1	1	1	1	6.16155e-40
BAALC-AS1	1	370	92	0.248649	2.71174e-08	9.65306e-08	1	1	1	5.27164e-06	1	1	1	0.99597	1	1	1	1	1	1	4.17315e-46
CYP4F12	1	370	85	0.22973	5.41692e-09	2.242e-08	1	1	1	0.878259	1	1	1	0.993851	1	1	1	1	1	1	1.09352e-62
TMEM231	1	370	80	0.216216	3.55274e-07	1.04675e-06	1	1	1	2.16401e-08	1	1	1	0.991687	1	1	1	1	1	1	1.17921e-34
C20orf85	1	370	79	0.213514	2.09653e-08	7.67258e-08	1	1	1	1	1	1	1	1	1	1	1	1	1	1	5.48351e-65
DNAH5	1	370	86	0.232432	1.11029e-06	3.04746e-06	1	1	1	0.000857516	1	1	1	0.994211	1	1	1	1	1	1	1.72099e-47
DNAH7	1	370	91	0.245946	1.39749e-09	6.81115e-09	1	1	1	1.61535e-07	1	1	1	1	1	1	1	1	1	1	5.8368e-44
CCDC114	1	370	82	0.221622	1.06588e-08	4.21104e-08	1	1	1	0.970966	1	1	1	1	1	1	1	1	1	1	8.41744e-65
TSTD1	1	370	78	0.210811	2.62662e-08	9.38206e-08	1	1	1	0.965455	1	1	1	1	1	1	1	1	1	1	1.65895e-61
ZMYND12	1	370	88	0.237838	2.7519e-09	1.24252e-08	1	1	1	0.0110613	1	1	1	1	1	1	1	1	1	1	7.54129e-54
TRDN	1	370	81	0.218919	3.05266e-06	7.84219e-06	0.999999	1	1	1	1	1	1	0.952778	1	1	1	1	1	1	1.29487e-61
OSCP1	1	370	76	0.205405	4.12223e-08	1.40506e-07	1	1	1	0.0984749	1	1	1	1	0.982555	1	1	1	1	1	7.32527e-48
TMEM232	1	370	94	0.254054	2.16881e-07	6.71238e-07	1	1	1	2.76073e-12	1	1	1	0.975521	1	1	1	1	1	1	7.73387e-36
WDR49	1	370	92	0.248649	3.26752e-07	9.65446e-07	1	1	1	1.90786e-07	1	1	1	0.99597	0.992611	1	1	1	1	1	5.65864e-42
CLEC3B	1	370	76	0.205405	4.12223e-08	1.40506e-07	1	1	1	0.0984749	1	1	1	1	1	1	1	1	1	1	1.28586e-49
HSBP1	1	370	66	0.178378	3.91496e-07	1.15023e-06	1	1	1	1	1	1	1	1	1	1	1	1	1	1	3.04418e-54
RTP1	1	370	74	0.2	1.27367e-06	3.42381e-06	1	1	1	0.958904	1	1	1	0.988067	1	1	1	1	1	1	6.70529e-56
ZC2HC1C	1	370	79	0.213514	4.39731e-07	1.28112e-06	1	1	1	0.424895	1	1	1	1	1	1	1	1	1	1	8.98407e-56
KRT6A	2	261	152	0.582375	1.33618e-15	1.25099e-13	1	1	1	1	1	1	1	1	1	1	1	1	1	1	1
AKR1C1	2	261	141	0.54023	6.10843e-13	1.01128e-11	1	1	1	1	1	1	1	1	1	1	0.999835	1	1	1	1
DSG3	2	261	150	0.574713	8.33291e-14	2.06934e-12	1	1	1	1	1	1	1	1	1	1	0.999906	1	1	1	1
IGFL2-AS1	2	261	147	0.563218	1.62e-13	3.37932e-12	1	1	1	1	1	1	1	1	1	1	1	1	1	1	1
KRT8	2	261	140	0.536398	7.6184e-13	1.22246e-11	1	1	1	1	1	1	1	1	1	1	1	1	1	1	1
FXYD3	2	261	150	0.574713	1.63436e-12	2.24295e-11	1	1	1	1	1	1	1	1	1	1	1	1	1	1	1
NMRAL2P	2	261	148	0.56705	1.29811e-13	2.76313e-12	1	1	1	1	1	1	1	1	1	1	1	1	1	1	1
GPX2	2	261	147	0.563218	3.9617e-11	3.20315e-10	1	1	1	1	1	1	1	1	1	1	1	1	1	1	1
GSTA1	2	261	151	0.578544	1.72364e-11	1.60514e-10	1	1	1	1	1	1	1	1	1	1	1	1	1	1	1
AKR1B10	2	261	138	0.528736	2.13636e-11	1.82641e-10	1	1	1	1	1	1	1	1	1	1	1	1	1	1	1
AKR1C2	2	261	143	0.547893	9.08029e-11	6.48681e-10	1	1	1	1	1	1	1	1	1	1	1	1	1	1	1
DSP	2	261	144	0.551724	3.14699e-13	5.65915e-12	1	1	1	1	1	1	1	1	1	1	1	1	1	1	1
KRT17	2	261	150	0.574713	2.11014e-15	1.46725e-13	1	1	1	1	1	1	1	1	1	1	1	1	1	1	1
CXCL17	2	261	149	0.570881	2.02624e-12	2.6091e-11	1	1	1	1	1	1	1	1	1	1	1	1	1	1	1
ADH7	2	261	145	0.555556	4.78081e-12	5.45023e-11	1	1	0.999908	1	1	1	1	1	1	1	1	1	1	1	1
KRT6B	2	261	149	0.570881	2.02624e-12	2.6091e-11	1	1	1	1	1	1	1	1	1	1	1	1	1	1	1
PKP1	2	261	148	0.56705	2.51177e-12	3.11878e-11	1	1	1	1	1	1	1	1	1	1	1	1	1	1	1
KLK8	2	261	150	0.574713	2.05432e-10	1.33084e-09	1	1	1	1	1	1	1	1	1	1	1	1	1	1	1
KLK11	2	261	149	0.570881	2.61405e-11	2.19875e-10	1	1	1	1	1	1	1	1	1	1	1	1	1	1	1
KRT16	2	261	150	0.574713	1.63436e-12	2.24295e-11	1	1	1	1	1	1	1	1	1	1	1	1	1	1	1
SNAR-C4	2	261	144	0.551724	3.14699e-13	5.65915e-12	1	1	1	1	1	1	0.996702	1	1	1	1	1	1	1	1
RPS16	2	261	106	0.40613	1.31182e-09	6.64191e-09	1	1	1	1	1	1	0.997052	1	1	1	1	1	1	1	1
DMKN	2	261	128	0.490421	1.07129e-11	1.04425e-10	1	1	1	1	1	1	1	1	1	1	1	1	1	1	1
ELF3	2	261	133	0.509579	3.5668e-12	4.22747e-11	1	1	1	1	1	0.919274	1	1	1	1	1	1	1	1	1
KRT19	2	261	125	0.478927	2.06997e-11	1.81427e-10	1	1	1	1	1	1	1	1	1	1	1	1	1	1	1
KRT4	2	261	142	0.544061	1.02208e-09	5.384e-09	1	1	1	1	1	0.932052	1	1	1	1	1	1	1	1	1
LINC01133	2	261	138	0.528736	2.13636e-11	1.82641e-10	1	1	0.999854	1	1	0.926641	1	1	1	1	1	1	1	1	1
SNAR-C3	2	261	145	0.555556	2.52235e-13	4.9638e-12	1	1	1	1	1	1	0.953923	1	1	1	1	1	1	1	1
SNAR-E	2	261	135	0.517241	6.46118e-14	1.87195e-12	1	1	1	1	1	1	0.851163	1	1	1	0.99976	1	1	1	1
DSC3	2	261	138	0.528736	2.2673e-09	1.04637e-08	1	1	0.999854	1	1	0.926641	1	1	1	1	1	1	1	1	1
KLK10	2	261	138	0.528736	1.18471e-12	1.6698e-11	1	1	1	1	1	1	1	1	1	1	1	1	1	1	1
LCAL1	2	261	147	0.563218	3.11322e-12	3.82011e-11	1	1	1	1	1	1	1	1	1	1	1	1	1	1	1
FAM83B	2	261	134	0.51341	5.01004e-09	2.10705e-08	1	1	0.999811	1	1	0.920804	1	1	1	1	1	1	1	1	1
TACSTD2	2	261	144	0.551724	3.14699e-13	5.65915e-12	1	1	1	1	1	1	1	1	1	1	1	1	1	1	1
FMO3	2	261	138	0.528736	2.55025e-10	1.59276e-09	1	1	1	1	1	1	1	1	1	1	0.999801	1	1	1	1
SNAR-G1	2	261	132	0.505747	1.27942e-13	2.76313e-12	1	1	1	1	1	1	1	1	1	1	1	1	1	1	1
IDO1	2	261	137	0.524904	3.13351e-10	1.91126e-09	1	1	1	1	1	0.925223	1	1	1	1	1	1	1	1	1
SNAR-I	2	261	139	0.532567	9.50075e-13	1.43613e-11	1	1	1	1	1	1	0.980985	1	1	1	1	1	1	1	1
SFN	2	261	126	0.482759	5.01089e-13	8.42961e-12	1	1	1	1	1	1	1	1	1	1	1	1	1	1	1
SNAR-F	2	261	130	0.498084	6.90212e-12	7.34583e-11	1	1	1	1	1	1	0.999223	1	1	1	1	1	1	1	1
TP63	2	261	134	0.51341	8.11392e-14	2.06934e-12	1	1	1	1	1	0.920804	1	1	1	1	1	1	1	1	1
CLDN4	2	261	124	0.475096	7.8959e-13	1.22917e-11	1	1	1	1	1	1	1	1	1	1	1	1	1	1	1
TRIM29	2	261	121	0.463602	4.97453e-11	3.81503e-10	1	1	1	1	1	1	1	1	1	1	1	1	1	1	1
CASC8	2	261	119	0.455939	1.23219e-08	4.75992e-08	1	1	1	1	1	1	1	1	1	1	1	1	1	1	1
GJB6	2	261	125	0.478927	3.65218e-09	1.57406e-08	1	1	1	1	1	1	0.998974	1	1	1	1	1	1	1	1
A4GALT	2	261	109	0.417625	9.73358e-09	3.8897e-08	1	1	1	1	1	1	1	1	1	1	1	1	1	1	1
FAT2	2	261	123	0.471264	9.911e-13	1.45594e-11	1	1	1	1	1	1	1	1	1	1	1	1	1	1	1
RHCG	2	261	118	0.452107	1.47858e-09	7.13962e-09	1	1	1	1	1	1	1	1	1	1	1	1	1	1	1
CALB1	2	261	110	0.421456	1.89562e-11	1.71925e-10	1	1	1	1	1	1	1	1	1	1	1	1	1	1	1
KRT18	2	261	93	0.356322	2.18619e-08	7.91737e-08	1	1	1	1	1	1	1	1	1	1	1	1	1	1	1
AKR1C3	2	261	94	0.360153	7.0942e-10	3.87395e-09	1	1	1	1	1	1	1	1	1	1	1	1	1	1	1
NECTIN4	2	261	116	0.444444	2.25051e-09	1.04324e-08	1	1	1	1	1	1	1	1	1	1	1	1	1	1	1
POU2AF1	2	261	119	0.455939	1.19815e-09	6.09594e-09	1	1	1	1	1	1	1	1	1	1	1	1	1	1	1
KRTCAP3	2	261	103	0.394636	9.25935e-11	6.56973e-10	1	1	1	1	1	1	1	1	1	1	1	1	1	1	1
KRT5	2	261	117	0.448276	1.82432e-09	8.64896e-09	1	1	1	1	1	1	1	1	1	1	1	1	1	1	1
SPINT2	2	261	92	0.35249	3.26752e-07	9.65446e-07	1	1	1	1	1	1	1	1	1	1	1	1	1	0.999958	1
DSG2	2	261	93	0.356322	2.18619e-08	7.91737e-08	1	1	1	1	1	1	1	1	1	1	1	1	1	1	1
KLF5	2	261	102	0.390805	3.12511e-09	1.38702e-08	1	1	1	1	1	1	1	1	1	1	1	1	1	1	1
PSME2	2	261	94	0.360153	7.0942e-10	3.87395e-09	1	1	1	1	1	1	1	1	1	1	1	1	1	1	1
SCNN1A	2	261	105	0.402299	2.23778e-08	8.07613e-08	1	1	1	1	1	1	1	1	1	1	1	1	1	0.99999	1
IGLL5	2	261	133	0.509579	1.0189e-13	2.36158e-12	1	1	1	1	1	1	1	1	1	1	1	1	1	1	1
TNFSF10	2	261	89	0.340996	2.19562e-09	1.02233e-08	1	1	1	1	1	1	1	1	1	1	1	1	1	1	1
PNCK	2	261	93	0.356322	8.89345e-10	4.75686e-09	1	1	1	1	1	1	1	1	1	1	0.996721	1	1	1	1
AIM2	2	261	87	0.333333	3.44898e-09	1.49265e-08	1	1	1	1	1	1	1	1	1	1	1	1	1	1	1
KLHL31	2	261	92	0.35249	1.11486e-09	5.69998e-09	1	1	1	1	1	1	1	1	1	1	0.996511	1	1	1	1
RPL8	2	261	79	0.302682	2.09653e-08	7.67258e-08	1	1	1	1	1	1	1	1	1	1	1	1	1	1	1
ALDH3A1	2	261	101	0.386973	5.12737e-08	1.7012e-07	1	1	1	1	1	1	1	1	1	1	1	1	1	1	1
CLDN7	2	261	97	0.371648	1.17062e-07	3.75678e-07	1	1	1	1	1	1	1	1	1	1	1	1	1	1	1
GPR87	2	261	93	0.356322	2.66241e-07	8.02572e-07	1	1	1	1	1	1	1	1	1	1	1	1	1	1	1
PERP	2	261	76	0.291188	4.12223e-08	1.40506e-07	1	1	1	1	1	1	1	1	1	1	1	1	1	1	1
RPL13	2	261	84	0.321839	1.21202e-05	2.90606e-05	0.999996	1	1	1	1	1	1	1	1	1	1	1	1	1	1
CLDN1	2	261	85	0.32567	1.21977e-07	3.8906e-07	1	1	1	1	1	1	1	1	1	1	1	1	1	0.999909	1
DEFB1	2	261	113	0.43295	4.2203e-09	1.80401e-08	1	1	1	1	1	1	1	1	1	1	1	1	1	1	1
MPZL2	2	261	93	0.356322	2.18619e-08	7.91737e-08	1	1	1	1	1	0.826908	1	1	1	1	1	1	1	1	1
IRF6	2	261	88	0.337165	7.39337e-07	2.07851e-06	1	1	1	1	1	1	0.992011	1	1	1	1	1	1	1	1
MZB1	2	261	115	0.440613	2.77576e-09	1.2479e-08	1	1	1	1	1	1	1	1	1	1	1	1	1	1	1
SYNE4	2	261	96	0.367816	1.14453e-08	4.47096e-08	1	1	1	1	1	1	1	1	1	1	1	1	1	1	1
CES1	2	261	86	0.329502	1.11029e-06	3.04746e-06	1	1	1	1	1	1	0.947473	1	1	1	1	1	1	1	1
JCHAIN	2	261	113	0.43295	2.85813e-10	1.76152e-09	1	1	1	1	1	1	1	1	1	1	1	1	1	1	1
PSME1	2	261	80	0.306513	1.67336e-08	6.36975e-08	1	1	1	1	1	1	1	1	1	1	1	1	1	1	1
RPL37	2	261	81	0.310345	2.14367e-05	4.94656e-05	0.999993	1	1	1	1	1	1	1	1	1	1	1	1	1	1
TRIM16L	2	261	76	0.291188	4.12223e-08	1.40506e-07	1	1	1	1	1	1	0.9845	1	1	1	1	1	1	1	1
KRT15	2	261	89	0.340996	5.17049e-08	1.7012e-07	1	1	1	1	1	1	1	1	1	1	1	1	1	1	1
FAM83H	2	261	82	0.314176	2.31782e-07	7.13122e-07	1	1	1	1	1	1	0.98887	1	1	1	1	1	1	1	1
IRF4	2	261	102	0.390805	1.16121e-10	8.0743e-10	1	1	1	1	1	1	1	1	1	1	1	1	1	1	1
SDC1	2	261	84	0.321839	6.78822e-09	2.77651e-08	1	1	1	1	1	1	1	1	1	1	1	1	1	1	1
EPCAM	2	261	74	0.283525	6.46838e-08	2.10829e-07	1	1	0.991011	1	1	1	1	1	1	1	1	1	1	1	1
FAM83H-AS1	2	261	84	0.321839	1.51108e-07	4.79045e-07	1	1	0.995266	1	1	1	1	1	1	1	1	1	1	1	1
FOXQ1	2	261	86	0.329502	1.11029e-06	3.04746e-06	1	1	0.995837	1	1	0.802294	1	1	1	1	0.99494	1	1	1	1
LAMP3	2	261	86	0.329502	9.84462e-08	3.17893e-07	1	1	0.995837	1	1	0.802294	0.991077	1	1	1	1	1	1	1	1
JUP	2	261	72	0.275862	1.01481e-07	3.26683e-07	1	1	1	1	1	0.742186	1	1	1	1	1	1	1	1	1
IFNG	2	261	93	0.356322	2.66241e-07	8.02572e-07	1	1	1	1	1	1	1	1	1	1	1	1	1	1	1
AQP3	2	261	88	0.337165	7.39337e-07	2.07851e-06	1	1	1	1	1	1	1	1	1	1	1	1	1	1	1
GJB2	2	261	80	0.306513	3.73355e-06	9.52102e-06	0.999999	1	1	1	1	1	1	1	1	1	1	1	1	1	1
CD79A	2	261	96	0.367816	1.19398e-06	3.24655e-06	1	1	1	1	1	1	1	1	1	1	1	1	1	1	1
LYPD3	2	261	83	0.318008	1.87163e-07	5.82721e-07	1	1	1	1	1	1	1	1	1	1	1	1	1	1	1
KCNMB2-AS1	2	261	82	0.314176	2.31782e-07	7.13122e-07	1	1	0.994618	1	1	0.786702	1	1	1	1	1	1	1	1	1
CLCA2	2	261	76	0.291188	4.12223e-08	1.40506e-07	1	1	0.992092	1	1	1	1	1	1	1	1	1	0.999999	1	1
CXCR6	2	261	78	0.298851	5.44164e-07	1.55072e-06	1	1	1	1	1	1	1	1	1	1	1	1	1	1	1
RARRES1	2	261	65	0.249042	4.90216e-07	1.40466e-06	1	1	1	1	1	1	1	1	1	1	1	1	1	1	1
IFITM1	2	261	79	0.302682	4.39731e-07	1.28112e-06	1	1	1	1	1	1	1	1	1	1	1	1	1	1	1
LCN2	2	261	73	0.279693	1.5746e-06	4.18956e-06	1	1	1	1	1	1	1	1	1	1	1	1	1	1	1
BAIAP2L1	2	261	70	0.268199	1.59186e-07	5.00094e-07	1	1	1	1	1	1	0.97842	1	1	1	1	1	1	1	1
COX6B1	2	261	63	0.241379	7.68518e-07	2.14322e-06	1	1	1	1	1	1	1	1	1	1	1	1	1	1	1
NELL1	2	261	70	0.268199	1.59186e-07	5.00094e-07	1	1	0.988386	1	1	1	1	1	1	1	0.986392	1	1	1	1
STEAP1	2	261	68	0.260536	2.49662e-07	7.61396e-07	1	1	1	1	1	1	1	1	1	1	1	1	1	1	1
FAM46C	2	261	83	0.318008	8.50631e-09	3.45217e-08	1	1	1	1	1	0.790711	1	1	1	1	1	1	1	1	1
S100A11	2	261	64	0.245211	1.05155e-05	2.53295e-05	0.999999	1	1	1	1	1	1	1	1	1	1	1	0.99999	0.999081	1
SLAMF7	2	261	76	0.291188	8.32847e-07	2.31643e-06	1	1	1	1	1	1	1	1	1	1	1	1	1	1	1
SPINT1	2	261	61	0.233716	1.97148e-05	4.60011e-05	0.999998	1	1	1	1	1	0.964572	1	1	1	1	1	1	1	1
CDH1	2	261	61	0.233716	1.97148e-05	4.60011e-05	0.999998	1	1	1	1	1	1	1	1	1	1	1	1	1	1
CTLA4	2	261	79	0.302682	2.09653e-08	7.67258e-08	1	1	1	1	1	1	1	1	1	1	1	1	1	1	1
FBN2	2	261	64	0.245211	6.13804e-07	1.73495e-06	1	1	1	1	1	0.70004	1	1	1	1	0.980293	1	1	1	1
PI3	2	261	70	0.268199	1.59186e-07	5.00094e-07	1	1	1	1	1	1	1	1	1	1	1	1	1	1	1
LAMC2	2	261	68	0.260536	4.53237e-06	1.14185e-05	0.999999	1	1	1	1	1	1	1	1	1	1	1	1	1	1
LINC01206	2	261	69	0.264368	1.9936e-07	6.18847e-07	1	1	1	1	1	1	0.716891	1	1	1	0.985525	1	1	1	1
GRHL1	2	261	68	0.260536	2.49662e-07	7.61396e-07	1	1	0.9868	1	1	1	1	1	1	1	1	1	1	1	1
SIRPG	2	261	77	0.295019	3.29059e-08	1.15171e-07	1	1	1	1	1	1	1	1	1	1	1	1	1	1	1
CSTA	2	261	59	0.226054	1.88787e-06	4.97234e-06	1	1	1	1	1	1	1	1	1	1	1	1	1	1	1
ABCA13	2	261	68	0.260536	4.53237e-06	1.14185e-05	0.999999	1	0.9868	1	1	1	1	1	1	1	0.984604	1	1	1	1
BIK	2	261	72	0.275862	1.84633e-05	4.33722e-05	0.999996	1	1	1	1	1	1	1	1	1	1	1	1	1	1
FBL	2	261	60	0.229885	2.42964e-05	5.56948e-05	0.999997	1	1	1	1	1	1	1	1	1	1	1	1	1	1
LINC00578	2	261	61	0.233716	1.20462e-06	3.24655e-06	1	1	1	1	1	1	0.964572	1	1	1	1	1	1	1	1
MAP3K13	2	261	58	0.222222	2.36323e-06	6.11625e-06	1	1	1	1	1	1	1	1	1	1	1	1	1	1	1
UBD	2	261	69	0.264368	3.34153e-05	7.60964e-05	0.999993	1	1	1	1	1	1	1	1	1	1	1	1	1	1
FUT1	2	261	65	0.249042	4.90216e-07	1.40466e-06	1	1	0.984006	1	1	1	0.866967	1	1	1	1	1	1	1	1
CDA	2	261	64	0.245211	6.13804e-07	1.73495e-06	1	1	1	1	1	0.70004	1	1	1	1	1	1	1	1	1
UPK1B	2	261	135	0.517241	4.04953e-11	3.24897e-10	1	1	1	1	1	1	1	1	1	1	1	1	1	1	1
TPD52L1	2	261	63	0.241379	1.29698e-05	3.07443e-05	0.999998	1	1	1	1	0.694313	1	1	1	1	1	1	1	1	1
TPBG	2	261	60	0.229885	1.50806e-06	4.0331e-06	1	1	1	1	1	1	1	1	1	1	0.97478	1	1	1	1
PTHLH	2	261	63	0.241379	1.29698e-05	3.07443e-05	0.999998	1	1	1	1	1	0.968265	1	1	1	1	1	1	1	1
TXN	2	261	52	0.199234	9.08522e-06	2.19349e-05	1	1	1	1	1	1	1	1	1	1	1	1	1	1	0.999883
ASPM	3	508	146	0.287402	7.34446e-05	0.000161951	0.999932	1	0.0332759	0.414645	1	1	0.985939	1.69728e-17	0.482352	0.998041	0.999879	1	0.959633	0.75165	0.00102793
CCNB1	3	508	152	0.299213	0.00273497	0.00513977	0.997086	1	0.00517068	0.887807	1	1	0.997783	7.05255e-09	0.958456	0.998489	0.999917	1	1.26978e-05	0.98005	0.00227023
PLK1	3	508	154	0.30315	0.00217919	0.00415519	0.99766	1	0.0259867	0.781597	1	0.946023	0.990089	1.65949e-13	0.54384	1	0.999197	1	1.06668e-10	0.999763	0.913251
TOP2A	3	508	151	0.297244	4.55127e-08	1.54122e-07	1	1	0.71658	0.766861	0.998502	1	0.963234	2.51114e-15	0.896616	0.998422	0.999912	1	0.88324	1	3.62144e-15
TPX2	3	508	143	0.281496	0.00365434	0.00669856	0.996284	1	1.61582e-05	0.393746	1	1	0.950366	1.60069e-09	0.317269	0.99777	0.998509	1	0.316491	0.99377	0.0628235
BIRC5	3	508	146	0.287402	0.0102079	0.0177744	0.989248	1	0.00138414	0.269402	0.986021	1	0.999682	5.89388e-10	0.98323	0.998041	0.999879	1	0.279385	0.971415	2.25323e-05
CENPE	3	508	143	0.281496	0.000745505	0.0015069	0.999272	1	0.00624449	0.393746	1	0.933342	0.778145	1.78417e-20	0.754726	0.99777	0.998509	1	0.949734	0.621218	0.190886
PTTG1	3	508	145	0.285433	0.0029108	0.00546037	0.99702	1	0.000179707	0.73517	0.985488	1	0.999663	1.03702e-10	0.982513	0.997955	0.998667	1	0.0445545	0.994598	0.000893575
CENPF	3	508	150	0.295276	0.000300278	0.000634057	0.999699	1	0.576917	0.442426	0.987972	1	0.997551	4.83141e-17	0.996984	0.998352	0.999906	1	0.0980548	0.998769	3.54137e-06
FAM64A	3	508	151	0.297244	0.00306051	0.00572063	0.996752	1	0.0003189	0.613589	0.998502	1	0.999759	6.23726e-17	0.997126	0.998422	0.994883	1	5.44701e-05	0.9965	0.625735
PRC1	3	508	149	0.293307	0.00382368	0.00699666	0.995972	1	0.956226	0.878437	0.998365	0.940586	0.999731	3.73342e-17	0.788559	0.99828	1	1	0.000377413	0.912057	0.00943318
KPNA2	3	508	142	0.279528	4.01695e-06	1.01939e-05	0.999997	1	0.776963	0.0743722	0.983765	1	0.879798	5.87885e-11	0.980185	0.997672	0.999845	1	0.0039498	0.963906	0.00116485
CCNB2	3	508	151	0.297244	0.0114454	0.0197969	0.987632	1	0.000833968	0.449343	1	1	0.99767	4.63469e-06	0.956912	1	0.999912	1	7.00241e-14	0.990786	0.846195
HMGB2	3	508	137	0.269685	0.0034681	0.00639087	0.996605	1	0.00403364	0.352041	1	1	0.999474	1.26032e-13	0.975637	0.99711	0.999788	1	0.824234	0.998997	2.31226e-08
NEK2	3	508	142	0.279528	4.48982e-05	0.000101361	0.99996	1	0.094634	0.245523	0.997782	1	0.983284	6.02309e-09	0.940446	0.997672	0.991976	1	0.0538999	0.997696	2.50305e-05
NUF2	3	508	145	0.285433	8.8244e-06	2.16053e-05	0.999993	1	0.0315515	0.8649	0.998054	1	0.999663	0.000223413	0.946482	0.997955	0.999871	1	0.00311495	0.999885	1.93815e-11
AURKA	3	508	143	0.281496	0.0244513	0.0408697	0.9743	1	5.00632e-05	0.559786	1	0.933342	0.999624	6.21479e-05	0.942524	1	0.999854	1	2.02555e-06	0.93372	0.0403527
CDCA3	3	508	136	0.267717	0.000300311	0.000634057	0.99973	1	0.00151287	0.117054	0.927649	0.923778	0.999444	0.0246115	0.710499	0.996983	0.964654	1	0.87331	0.654806	1.53045e-07
CDC20	3	508	142	0.279528	0.00192686	0.00369433	0.998082	1	0.00581969	0.94202	0.983765	1	0.999602	4.07721e-07	0.995572	1	1	1	1.00688e-05	0.983389	0.000128751
TROAP	3	508	142	0.279528	0.00192686	0.00369433	0.998082	1	0.0267717	0.552819	0.983765	1	0.983284	1.34604e-09	0.940446	0.997672	0.999845	1	0.000260915	0.99934	0.013483
CKS2	3	508	144	0.283465	0.000656025	0.00133379	0.999357	1	0.0146027	0.150298	0.997967	0.934608	0.952175	5.37192e-07	0.999554	0.997864	0.99859	1	1.82911e-09	0.999979	0.201424
CDKN3	3	508	145	0.285433	0.00134192	0.00267103	0.99865	1	0.00716965	0.998149	1	0.935849	0.985316	0.131589	0.946482	0.997955	0.999871	1	1.74566e-07	0.533388	0.000440843
CKAP2	3	508	147	0.28937	0.0001751	0.000378115	0.999831	1	0.0175035	0.587133	1	1	1	3.08189e-05	0.950191	0.998124	0.993745	1	4.26855e-09	0.995321	0.0357842
HJURP	3	508	136	0.267717	0.00178811	0.00344731	0.998294	1	7.02328e-05	0.93	1	1	0.978388	4.19584e-08	0.267471	0.996983	0.997795	1	0.115503	0.654806	0.0556987
KIF2C	3	508	132	0.259843	0.0120423	0.0207949	0.988168	1	0.0146687	0.811777	0.996573	0.917715	0.99405	2.20071e-08	0.915617	1	0.997246	1	0.325828	0.968954	1.61045e-07
SGO2	3	508	139	0.273622	0.000198139	0.000425224	0.99982	1	0.231963	0.8422	1	1	0.868151	1.99142e-13	0.851768	0.997349	0.999813	1	0.196036	0.957159	7.69308e-05
CKAP2L	3	508	143	0.281496	0.00170922	0.00333843	0.998293	1	0.000147098	0.559786	1	1	0.996535	7.11686e-11	0.942524	0.99777	0.992364	1	0.0138857	0.999862	0.00133744
TACC3	3	508	138	0.271654	0.00139779	0.00277167	0.998658	1	0.00434899	0.934239	0.99736	1	0.864064	5.73324e-08	0.573509	0.997232	1	1	0.328097	0.774125	6.44309e-05
KIF20A	3	508	140	0.275591	0.122407	0.181608	0.87112	1	0.00504059	0.706472	0.997581	0.929398	1	1.87564e-08	0.856041	0.997461	0.998236	1	3.78945e-05	0.790585	0.294809
BUB1	3	508	136	0.267717	0.00178811	0.00344731	0.998294	1	0.000207007	0.829702	1	1	0.855571	9.75697e-09	0.838318	0.996983	0.997795	1	0.0508217	0.90573	0.0350352
FAM83D	3	508	129	0.253937	0.0163671	0.0278482	0.984048	1	0.00212686	0.79735	1	1	0.917608	4.0459e-16	0.661161	0.995919	1	1	0.283709	0.962791	0.0300269
KIF23	3	508	134	0.26378	0.00977005	0.017069	0.990346	1	0.306169	0.925511	1	0.920804	0.931053	6.96199e-09	0.696919	0.996711	0.999744	1	0.0263479	0.633219	0.000352215
NUSAP1	3	508	147	0.28937	1.76455e-08	6.59652e-08	1	1	0.952554	0.987109	1	1	0.999699	1.34813e-08	0.999621	1	1	1	0.459016	0.99844	2.20696e-24
CCNA2	3	508	123	0.242126	0.00387577	0.00707956	0.996531	1	0.00325052	0.144259	0.994934	1	0.789173	4.60986e-09	0.450369	0.994715	0.995474	1	0.460776	0.975678	0.0280263
TTK	3	508	128	0.251969	0.00463999	0.00835839	0.995675	1	0.00195355	0.168623	1	1	0.817111	3.24666e-12	0.991396	1	0.996563	1	0.141122	0.92191	0.155962
CDCA8	3	508	136	0.267717	0.0150173	0.0255933	0.984853	1	0.128626	0.345129	1	0.923778	0.999444	2.55064e-15	0.162999	0.996983	1	1	0.164736	0.99891	0.000992856
KIF14	3	508	138	0.271654	0.000587217	0.00120802	0.999451	1	0.138806	0.524477	0.981157	1	0.864064	2.68334e-11	0.573509	0.997232	0.998028	1	0.0235594	0.991145	0.0152932
DLGAP5	3	508	132	0.259843	0.00127531	0.00255798	0.998831	1	0.0146687	0.811777	0.996573	1	0.837266	0.0195041	0.682923	1	0.986884	1	0.00707328	0.936894	2.08788e-05
HN1	3	508	115	0.226378	0.148463	0.217787	0.85534	1	0.00420766	0.867941	0.526032	1	1	9.88377e-23	0.984209	0.992543	0.970464	1	0.999284	0.850884	0.0117487
KIF18A	3	508	133	0.261811	5.63487e-05	0.00012585	0.999954	1	0.298102	0.488108	0.996719	0.919274	0.975456	9.60263e-12	0.918461	0.996566	0.999728	1	9.47615e-06	0.987503	0.28122
ECT2	3	508	123	0.242126	0.00819379	0.0145096	0.992456	1	4.93246e-05	0.413183	1	1	0.962728	1.67135e-13	0.614969	1	0.995474	1	0.558692	0.996854	0.0463034
PBK	3	508	137	0.269685	3.06402e-05	7.00828e-05	0.999975	1	0.00164607	0.99737	1	1	1	0.000101109	1	0.99711	0.997915	1	3.54166e-06	0.66534	0.00225378
AURKB	3	508	134	0.26378	0.0843452	0.128991	0.913145	1	0.00127369	0.331357	0.996859	1	0.994605	7.16224e-20	0.152552	0.996711	0.997536	1	0.966936	0.995752	0.0471457
PIF1	3	508	125	0.246063	4.45785e-06	1.12853e-05	0.999997	1	0.358687	0.428323	0.969585	0.905931	0.965688	3.00953e-08	0.990093	0.995151	0.999551	1	6.40469e-05	0.952869	0.0340175
GTSE1	3	508	140	0.275591	0.0100093	0.0174577	0.989779	1	0.000107962	0.53874	0.997581	0.929398	0.618967	1.4037e-05	0.736402	0.997461	0.998236	1	0.444393	0.08066	0.161061
MKI67	3	508	143	0.281496	0.00365434	0.00669856	0.996284	1	0.657805	0.251427	0.98436	1	0.983989	2.64376e-22	0.0151393	0.99777	0.998509	1	0.874748	0.883673	0.257361
KNSTRN	3	508	128	0.251969	0.0544036	0.0867629	0.945656	1	0.0922883	0.973737	1	1	0.999132	4.96109e-10	0.964861	0.995739	1	1	1.93105e-15	0.982496	0.977791
NDC80	3	508	131	0.257874	6.50226e-06	1.61858e-05	0.999995	1	0.557705	0.649583	1	0.916125	0.999265	1.26314e-06	0.813705	0.996256	0.999691	1	0.0194723	0.994679	1.3744e-08
HMMR	3	508	132	0.259843	6.55244e-05	0.00014603	0.999947	1	0.708622	0.811777	1	1	0.974398	0.951948	0.970112	1	0.997246	1	0.00707328	0.719487	2.25957e-17
ARL6IP1	3	508	132	0.259843	5.50793e-06	1.38428e-05	0.999996	1	0.708622	0.656231	0.976473	1	0.999305	9.35152e-08	0.992876	0.996414	1	1	1.48991e-10	0.999999	0.0011237
DEPDC1	3	508	126	0.248031	3.75685e-06	9.55705e-06	0.999998	1	0.243454	0.615161	0.995552	1	0.967084	0.190782	0.896629	1	1	1	0.00327853	0.999367	1.717e-14
CDCA2	3	508	128	0.251969	1.06661e-05	2.5633e-05	0.999992	1	0.0048436	0.996098	1	1	0.999132	2.07616e-07	0.797558	1	1	1	0.024163	0.564725	0.000285481
MAD2L1	3	508	127	0.25	0.00100761	0.00202493	0.99912	1	0.0882471	0.28397	0.995741	1	0.999082	2.01079e-09	0.963419	0.995552	1	1	0.256792	0.992842	1.30249e-07
SMC4	3	508	129	0.253937	0.00413043	0.00749224	0.996139	1	0.0517958	0.0916746	0.792324	1	0.993113	1.18842e-10	0.347434	0.995919	0.99965	1	0.972865	0.689261	0.0014702
CENPA	3	508	124	0.244094	0.00732589	0.0130391	0.993239	1	0.000172048	0.148985	0.995149	0.904117	0.901874	7.74631e-05	0.889514	0.994938	0.980706	1	0.000595923	0.991085	0.322131
DBF4	3	508	107	0.21063	0.117413	0.174945	0.889955	1	2.14687e-05	0.990226	0.989861	1	0.677834	4.31804e-19	0.810123	0.989483	1	1	0.700675	0.970656	0.543719
KIF4A	3	508	130	0.255906	8.8443e-05	0.000193388	0.999929	1	0.90826	0.915737	1	1	0.97215	0.000148191	0.967586	1	0.999672	1	1.06069e-20	0.994267	0.321981
APOLD1	3	508	115	0.226378	5.81359e-06	1.45062e-05	0.999997	1	0.975728	1	0.992831	0.886144	0.998211	7.33958e-06	1	1	0.99299	1	0.997941	0.998347	2.93214e-31
KNL1	3	508	125	0.246063	0.00304474	0.00570138	0.997262	1	0.358687	0.608046	0.995355	1	0.965688	4.35127e-23	0.893123	0.995151	1	1	0.837476	0.842383	0.0340175
CDK1	3	508	123	0.242126	2.40857e-05	5.53335e-05	0.999983	1	0.0178111	0.765854	0.892761	1	0.898427	1.56304e-06	0.450369	0.994715	0.995474	1	0.460776	0.827902	0.00250625
MXD3	3	508	123	0.242126	0.029469	0.0483272	0.971685	1	4.93246e-05	0.413183	0.967285	0.902268	0.990785	9.44771e-10	0.768248	0.994715	0.979762	1	0.558692	0.990413	0.0280263
SGO1	3	508	117	0.230315	0.00058359	0.00120293	0.999545	1	0.179439	0.875462	1	1	0.987697	9.61311e-06	0.72898	0.993158	0.993714	1	0.885568	0.86436	1.73535e-10
CEP55	3	508	108	0.212598	0.0391084	0.0630449	0.964912	1	0.00227411	0.0829896	1	1	0.931653	1.04776e-05	0.486168	0.989925	1	1	0.00749053	0.880078	0.454672
LSM5	3	508	113	0.222441	0.0122827	0.0210705	0.989224	1	0.000468381	0.860024	1	1	1	0.0606648	0.997615	1	1	1	1.99527e-12	0.740223	0.337439
CKS1B	3	508	115	0.226378	5.81359e-06	1.45062e-05	0.999997	1	0.716464	0.867941	1	1	0.98646	0.00237203	0.984209	0.992543	1	1	0.919141	0.959564	7.75523e-24
HMGB3	3	508	116	0.228346	0.0017318	0.00336363	0.998585	1	0.848078	1	1	1	0.998308	0.00662539	0.984924	1	0.999214	1	3.90381e-15	0.998484	0.00184245
CDC25C	3	508	123	0.242126	0.00169292	0.00331279	0.998536	1	0.000453763	0.257689	1	1	1	0.00456017	0.989119	0.994715	0.999492	1	0.366366	0.827902	4.30363e-09
ARHGAP11A	3	508	117	0.230315	0.0015184	0.0029881	0.998757	1	0.0118285	0.367629	1	1	0.987697	9.61311e-06	0.25552	0.993158	0.999262	1	0.0221501	0.998609	0.00213519
BUB1B	3	508	119	0.234252	0.0427482	0.0685945	0.959256	1	0.0296599	0.0616408	0.962174	1	0.988824	9.00951e-15	0.270335	0.993722	0.999348	1	0.0273641	0.795938	0.997952
GAS2L3	3	508	98	0.192913	0.00729436	0.0130052	0.994455	1	0.0763963	0.594405	1	0.842605	0.899207	3.24846e-12	0.75203	0.984524	1	1	0.0728683	0.978633	0.0892234
NMU	3	508	113	0.222441	8.23602e-06	2.04528e-05	0.999995	1	0.999267	0.992479	0.992182	1	0.857726	0.000230975	0.127731	0.991873	0.992185	1	0.999086	1	3.20183e-26
H2AFZ	3	508	123	0.242126	2.40857e-05	5.53335e-05	0.999983	1	0.341046	0.593595	1	0.902268	1	1.56304e-06	1	0.994715	0.979762	1	0.206407	0.990413	2.66845e-11
PARPBP	3	508	109	0.214567	0.000654655	0.0013336	0.999526	1	0.0694189	0.08649	0.990703	1	0.981979	1.75777e-07	0.925922	1	0.990296	1	0.0278607	0.999394	0.00131007
DEPDC1B	3	508	112	0.220472	0.0137131	0.0234089	0.987988	1	0.000136825	0.32985	0.951343	0.87944	0.941706	4.82999e-06	0.837304	0.991516	0.991749	1	0.146015	0.992527	0.0150324
SPC25	3	508	123	0.242126	0.00169292	0.00331279	0.998536	1	0.000453763	0.144259	1	1	0.898427	6.08679e-12	0.885799	0.994715	0.999492	1	0.817822	0.990413	0.00250625
PRR11	3	508	103	0.202756	0.0624139	0.0977443	0.944251	1	0.0497909	0.14077	0.933046	1	0.996518	2.33952e-09	0.785813	0.987512	0.998237	1	0.16774	0.845955	0.0858149
TUBA1C	3	508	104	0.204724	0.000143641	0.000310824	0.999912	1	0.456394	0.0115203	1	0.859589	0.809996	0.0764004	0.97383	1	1	1	2.63143e-10	0.383419	0.792045
CKAP5	3	508	101	0.198819	0.00500059	0.00897697	0.996192	1	0.592246	0.803352	0.928178	1	0.973725	3.28911e-16	0.602194	1	0.985091	1	0.796358	0.907321	0.00707064
FOXM1	3	508	115	0.226378	0.00459642	0.00830862	0.996092	1	0.272362	0.993108	1	0.886144	0.98646	9.21355e-13	0.714879	0.992543	0.970464	1	0.333235	0.917155	0.00158501
RACGAP1	3	508	104	0.204724	0.00339898	0.00633061	0.997405	1	0.456394	0.270753	1	1	0.996706	2.35982e-12	0.166911	0.988037	1	1	0.444623	0.383419	0.09327
OIP5	3	508	108	0.212598	0.000755555	0.00152426	0.999454	1	0.0658468	0.945563	1	0.869889	0.931653	3.18121e-08	0.923045	0.989925	1	1	0.000171768	0.999335	0.0092424
UBE2C	3	508	151	0.297244	0.000100577	0.000219002	0.999901	1	0.00482227	0.0519128	0.988417	0.942823	0.988693	6.504e-11	0.986411	0.998422	0.999049	1	0.345787	0.998862	2.4308e-05
SPAG5	3	508	113	0.222441	0.0122827	0.0210705	0.989224	1	0.000153777	0.860024	0.953054	1	0.943996	3.41038e-09	0.364711	1	1	1	0.041994	0.980518	0.178701
KIF4B	3	508	124	0.244094	2.04867e-05	4.76955e-05	0.999986	1	0.984458	1	0.995149	1	0.998915	0.28733	1	1	0.999523	1	3.43605e-28	0.950046	0.0505879
CCL5	4	301	146	0.48505	0.972814	1	0.0351118	0.209266	0.999913	0.998228	0.998137	0.133983	0.985939	0.99211	0.948367	0.860325	0.97705	1	1	0.111706	0.999975
CD2	4	301	151	0.501661	0.378488	0.522864	0.67653	1	0.999303	0.998578	0.988417	0.00184717	0.963234	0.876741	0.251287	0.75481	0.999049	1	1	0.0198687	0.896116
CD3D	4	301	151	0.501661	0.695799	0.907148	0.350998	1	0.999303	0.998578	0.998502	0.148173	0.999759	0.876741	0.251287	0.59819	0.999049	1	1	0.0932786	0.987946
CD3E	4	301	146	0.48505	0.972814	1	0.0351118	0.209266	0.999065	0.998228	0.986021	0.0183444	0.985939	0.99211	0.482352	0.860325	0.97705	1	1	0.0134939	0.981729
GZMA	4	301	147	0.488372	0.683455	0.89217	0.292347	1	0.999919	0.998304	0.948702	0.13677	0.957244	0.999857	0.883164	0.733583	0.978035	1	1	0.0454705	0.999999
GZMB	4	301	131	0.435216	0.0244324	0.0408697	0.9757	1	1	1	0.97559	0.22488	0.973296	0.996507	0.992531	0.913	0.956348	1	1	0.0773085	1
CD8A	4	301	134	0.445183	0.92857	1	0.0942118	0.493784	1	0.997	0.978147	0.102667	0.994605	0.997029	0.92122	0.920538	0.997536	1	1	0.738572	0.999993
GZMH	4	301	134	0.445183	0.895723	1	0.134936	0.660743	1	0.997	0.923061	0.0376803	0.722511	0.999684	0.972451	0.811369	0.688427	1	1	0.406335	1
IFNG	4	301	86	0.285714	0.549872	0.735278	0.585781	1	0.995837	0.9756	1	1	0.947473	1	0.9898	0.876812	1	1	0.999997	0.890075	0.999995
IL32	4	301	145	0.481728	0.942232	1	0.073278	0.398068	0.999009	0.998149	1	0.00528671	0.890559	0.991719	0.626398	0.722485	0.993088	1	1	0.161083	0.902864
CD3G	4	301	144	0.478405	0.791347	1	0.189473	0.902377	0.99895	0.998066	1	0.0505208	0.887067	0.991309	0.466638	0.852999	0.992735	1	1	0.00293262	0.999659
NKG7	4	301	135	0.448505	0.966332	1	0.0456153	0.261411	1	0.997129	0.996992	0.719639	0.729137	0.997185	0.99382	0.815925	0.96312	1	0.999999	0.531127	0.9999
CD96	4	301	133	0.44186	0.19125	0.272878	0.802268	1	0.99801	0.996866	0.920668	0.0114434	0.928534	0.999664	0.379155	0.649129	0.999728	1	1	0.0869921	0.993122
IL2RB	4	301	130	0.431894	0.472884	0.640543	0.514547	1	0.999756	0.996425	0.797288	0.699938	0.99344	0.947908	0.226923	0.290557	0.999672	1	1	0.117375	0.998368
PRF1	4	301	131	0.435216	0.835008	1	0.210028	0.986754	0.999771	0.996578	0.996421	0.440071	0.832404	0.999621	0.675771	0.797149	0.956348	1	0.999999	0.0458648	1
PTPRCAP	4	301	138	0.458472	0.931473	1	0.0600625	0.338623	0.99851	0.997483	0.981157	0.0138243	0.864064	0.81707	0.173787	0.929664	0.998028	1	1	0.774125	0.999771
CTSW	4	301	133	0.44186	0.972797	1	0.0375349	0.219938	0.99801	0.996866	0.977325	0.100242	0.928534	0.996864	0.533707	0.472841	0.959865	1	1	0.0085086	0.999871
LCK	4	301	140	0.465116	0.78227	0.997442	0.264263	1	0.998674	1	0.997581	0.00108653	0.981783	0.989468	0.184904	0.22146	0.999824	1	1	0.00194854	0.98433
CST7	4	301	128	0.425249	0.907618	1	0.0846828	0.450634	1	0.996098	0.995923	0.213085	0.914654	0.999545	0.797558	0.277458	0.984079	1	1	0.020421	0.999259
CD52	4	301	135	0.448505	0.92206	1	0.0693645	0.380479	0.998227	0.997129	0.978941	0.00342604	0.729137	0.897639	0.157732	0.323878	0.997669	1	1	0.00511894	0.976243
RPS27	4	301	128	0.425249	0.99983	1	0.000128283	0.00100601	1	1	0.995923	0.0310962	0.914654	0.870093	0.213954	0.435981	0.950537	1	1	0.00530281	0.995045
CD8B	4	301	111	0.368771	0.99883	1	0.0021057	0.0146416	1	0.991792	1	0.339313	0.983613	0.989871	0.931382	0.844135	0.99129	1	0.999996	0.600557	0.999963
CXCR6	4	301	101	0.335548	0.0112087	0.0194198	0.991022	1	1	0.987302	0.986856	0.0108309	0.973725	0.997661	0.772761	0.986393	1	1	1	0.344605	0.99997
CD7	4	301	108	0.358804	0.833905	1	0.230881	1	0.998989	0.990644	0.834482	0.049613	0.981104	0.988145	0.815838	0.158168	0.998708	1	0.999999	0.00290183	0.999943
PVRIG	4	301	110	0.365449	0.655712	0.861345	0.344566	1	0.999111	0.991426	0.843574	0.146803	0.997638	0.9577	0.205949	0.672883	0.998859	1	1	0.00787996	0.999334
IKZF3	4	301	108	0.358804	0.234948	0.332949	0.772917	1	0.991719	0.990644	0.94389	0.140009	0.981104	0.988145	0.022744	0.658708	0.998708	1	1	0.938153	0.984576
IFITM1	4	301	74	0.245847	0.793041	1	0.232386	1	0.947001	1	1	0.751771	1	0.988067	0.980581	0.595801	1	1	0.999807	0.891009	0.998581
CD6	4	301	100	0.332226	0.46701	0.633409	0.54573	1	1	1	0.986275	0.114195	0.995888	0.997515	0.412261	0.923542	0.997876	1	1	0.456089	0.999965
SKAP1	4	301	108	0.358804	0.507582	0.684875	0.595333	1	0.998989	1	1	0.000823287	0.931653	0.953763	0.322213	0.989925	0.959148	1	0.999999	0.317913	0.999149
SH2D1A	4	301	115	0.38206	0.148463	0.217787	0.85534	1	1	0.993108	0.864437	0.0618065	0.98646	0.991797	0.0718783	0.706528	0.99299	1	1	0.526205	0.570165
IL2RG	4	301	107	0.355482	0.24962	0.35183	0.832114	1	0.991241	0.990226	0.941864	0.00355188	0.997211	1	0.313809	0.152931	0.768164	1	1	0.0241544	0.965157
GZMK	4	301	103	0.342193	0.773825	0.989092	0.229324	1	0.998604	1	0.809758	0.85689	0.996518	0.997928	0.785813	0.805472	1	1	1	0.104916	0.912363
PYHIN1	4	301	101	0.335548	0.729789	0.94438	0.275956	1	1	1	0.799031	0.117296	0.973725	1	0.602194	0.238333	0.943868	1	1	0.0277962	0.9864
CD247	4	301	98	0.325581	0.309286	0.430687	0.706536	1	0.998075	1	0.985035	0.273067	0.771457	0.826117	0.24061	0.380878	0.98251	1	0.999996	0.0212248	0.997186
CXCR3	4	301	105	0.348837	0.741994	0.958984	0.260468	1	0.990203	0.989335	0.64287	0.308656	0.923095	0.570837	0.974995	0.935752	1	1	1	0.65148	0.958728
GNLY	4	301	99	0.328904	0.208944	0.297717	0.805041	1	1	1	0.787806	0.845571	0.609473	0.98107	0.994929	0.920852	0.706021	1	1	0.31915	1
LAT	4	301	97	0.322259	0.939475	1	0.0977815	0.507393	1	1	0.984374	0.105115	0.995145	0.979014	0.0615031	0.915203	0.981558	1	0.999967	0.00922632	0.921396
KLRD1	4	301	80	0.265781	0.842299	1	0.173735	0.838915	1	0.96833	0.852781	0.778455	0.419832	0.991687	1	0.234716	0.861149	1	0.999999	0.845715	0.999986
CLIC3	4	301	87	0.289037	0.0917601	0.13931	0.92316	1	1	0.976639	0.975933	0.806012	0.848118	0.886398	0.468248	0.880874	0.968813	1	1	0.40641	0.999004
IL7R	4	301	89	0.295681	0.896343	1	0.110242	0.563638	0.976292	0.978585	0.89126	0.00123312	0.954192	0.895394	0.309795	0.505017	0.971901	1	0.999982	6.78275e-05	0.999827
B2M	4	301	78	0.259136	0.972522	1	0.0550485	0.312041	0.993044	0.965455	0.964522	0.175604	0.924682	0.945191	0.57728	1	0.950406	1	0.997743	0.00203362	0.816065
CD5	4	301	83	0.275748	0.614502	0.812327	0.523314	1	0.96719	1	0.67863	0.199063	0.989468	1	0.255818	0.970578	1	1	0.999995	0.080758	0.96484
RPS29	4	301	115	0.38206	0.959576	1	0.0379623	0.21997	0.999356	1	0.992831	0.00124255	0.98646	0.906337	0.38185	0.197009	0.99299	1	1	0.648535	0.999904
ZAP70	4	301	112	0.372093	0.254848	0.358714	0.750093	1	0.999219	0.992143	0.692614	0.344421	0.941706	0.99039	0.692776	0.84847	0.966033	1	1	0.00962137	0.989514
ZNF683	4	301	94	0.312292	0.929908	1	0.11383	0.579147	1	0.982774	0.908391	0.523833	0.963606	0.975521	0.958903	0.906019	0.996918	1	0.999992	0.165905	1
SLAMF7	4	301	65	0.215947	0.139071	0.205455	0.895039	1	1	0.939283	1	0.705661	0.678059	0.97949	0.968555	0.280758	0.981472	1	0.999992	0.509873	0.999838
SH2D2A	4	301	89	0.295681	0.0040038	0.00728789	0.99734	1	0.996566	1	0.89126	0.0826441	0.992441	0.99517	0.488377	0.718758	1	1	1	0.00147357	0.980463
TBC1D10C	4	301	100	0.332226	0.46701	0.633409	0.54573	1	0.998307	0.986737	1	0.114195	0.906637	0.997515	0.256413	0.397483	0.984275	1	1	0.086337	0.82551
TIGIT	4	301	94	0.312292	0.0248289	0.0414344	0.990963	1	1	1	0.982211	0.0963852	0.882737	0.975521	0.87067	0.906019	1	1	1	0.642339	0.751917
SIRPG	4	301	82	0.272425	0.0846977	0.129165	0.964482	1	0.994618	1	1	1	1	0.955077	0.617239	0.969292	1	1	0.999994	0.334838	0.776243
SIT1	4	301	90	0.299003	0.263994	0.371086	0.758289	1	0.99678	0.979497	1	0.0253394	0.956244	0.899649	0.689764	0.725824	1	1	1	0.449642	0.114529
ITK	4	301	91	0.302326	0.247574	0.349417	0.773454	1	0.99698	0.98037	0.73766	0.238002	0.993233	1	0.953023	0.73275	0.996288	1	0.999999	0.463986	0.984042
2021-09-01	4	301	87	0.289037	0.632486	0.835041	0.389306	1	0.973569	1	0.975933	0.0774405	0.991557	0.748598	0.663758	0.29017	1	1	0.999997	0.0148321	0.904535
LAG3	4	301	73	0.242525	0.0311729	0.0510414	0.978765	1	0.990416	1	1	0.0459457	0.98171	1	1	0.954887	0.988694	1	0.999971	0.884037	0.999956
SH3BGRL3	4	301	77	0.255814	0.9763	1	0.0270655	0.168032	0.954779	1	0.837423	0.000516534	0.589497	0.830371	0.204841	0.39432	0.99117	1	0.999999	0.0936603	0.938697
THEMIS	4	301	80	0.265781	0.677729	0.885804	0.349532	1	0.993881	1	0.967452	0.060596	0.931125	0.991687	0.229873	0.648816	0.955227	1	1	0.032296	0.953378
CCT6A	5	279	152	0.544803	0.000562557	0.00116188	0.999419	1	1.17148e-199	1	1	1	1	1	1	1	1	1	1	1	1
CHCHD2	5	279	151	0.541219	0.0014444	0.00284785	0.998488	1	3.10857e-198	1	1	1	1	1	1	1	1	1	1	1	1
NPTX2	5	279	138	0.494624	0.00139779	0.00277167	0.998658	1	4.04821e-170	0.997483	1	1	0.995566	1	1	1	1	1	1	1	1
GBAS	5	279	150	0.537634	2.5713e-07	7.81885e-07	1	1	3.11935e-193	1	1	1	1	1	1	1	1	1	1	1	1
MRPS17	5	279	143	0.512545	0.00365434	0.00669856	0.996284	1	4.58474e-177	1	1	1	1	1	1	1	1	1	1	1	1
SNRPE	5	279	142	0.508961	0.0267781	0.0444032	0.971945	1	1.00106e-178	1	1	1	1	0.999806	1	1	1	1	1	1	1
FKBP5	5	279	116	0.415771	0.00406908	0.00739381	0.996534	1	4.44921e-140	1	1	1	1	1	1	1	0.993361	1	1	1	1
SOX13	5	279	100	0.358423	0.0473713	0.0756635	0.958995	1	9.67165e-119	0.986737	1	1	1	1	1	1	0.997876	1	1	1	1
ETNK2	5	279	103	0.369176	0.0624139	0.0977443	0.944251	1	1.31356e-92	0.988363	1	1	1	0.000759852	1	1	1	1	1	1	1
PPP1R15B	5	279	110	0.394265	0.0564862	0.0896729	0.947949	1	4.07396e-70	1	1	1	1	3.74163e-14	1	1	1	1	1	1	1
RBBP5	5	279	107	0.383513	0.023427	0.0392835	0.979613	1	2.40397e-73	1	1	1	1	5.04759e-12	1	1	1	1	1	1	1
VOPP1	5	279	124	0.444444	0.00343667	0.00634415	0.996917	1	5.18303e-157	0.995351	1	1	1	1	1	1	1	1	1	1	1
MDM4	5	279	115	0.412186	0.0194	0.0327945	0.982422	1	1.36996e-77	1	1	1	1	2.10826e-14	1	1	1	1	1	1	1
DSTYK	5	279	106	0.379928	0.0259932	0.0432391	0.977403	1	1.7304e-70	1	1	1	1	3.93082e-12	1	1	0.998537	1	1	1	1
LANCL2	5	279	102	0.365591	0.0205563	0.034693	0.98281	1	2.19358e-121	0.932585	1	1	1	0.997798	1	1	1	1	1	1	1
ZBED6	5	279	85	0.304659	0.109574	0.164204	0.908051	1	9.21188e-105	1	1	1	1	1	1	1	1	1	1	1	1
GLO1	5	279	89	0.318996	0.000120775	0.000261889	0.999943	1	5.15853e-110	1	1	1	1	0.99517	1	1	1	1	1	1	1
GNAS	5	279	87	0.311828	0.00525437	0.00940019	0.996505	1	1.39444e-96	0.886293	1	1	0.991557	1	1	1	1	1	1	1	0.999996
MT2A	5	279	95	0.340502	0.0756009	0.116991	0.93462	1	3.18272e-121	1	1	1	1	1	1	1	1	1	1	1	1
SUMF2	5	279	96	0.344086	0.00395949	0.00721984	0.99717	1	1.48278e-122	1	1	1	1	1	1	1	1	1	1	1	1
EGFR	5	279	76	0.272401	0.226139	0.320902	0.80728	1	3.54378e-90	0.962321	1	1	0.9845	1	1	1	1	1	1	1	1
SEZ6	5	279	75	0.268817	0.0104778	0.0182139	0.993514	1	9.80858e-92	1	1	1	1	0.988764	1	1	1	1	1	1	1
SEC14L1	5	279	80	0.286738	0.0571366	0.0902931	0.95608	1	4.4153e-90	1	1	1	1	0.991687	1	1	0.992665	1	1	1	0.999986
MGLL	5	279	70	0.250896	0.00801797	0.0142224	0.995498	1	2.82602e-85	1	1	1	0.97842	1	1	1	1	1	1	1	1
PSPH	5	279	74	0.265233	0.00450476	0.00815706	0.997499	1	1.3362e-87	1	1	1	1	0.988067	1	1	1	1	1	1	0.999998
CRYM	5	279	69	0.247312	0.00923573	0.0161625	0.994797	1	5.48031e-84	1	1	1	0.977197	1	1	1	1	1	1	1	1
MYBPC1	5	279	80	0.286738	0.028989	0.0476901	0.979054	1	2.39062e-95	1	1	1	0.931125	1	1	1	1	1	1	1	1
ATP5D	5	279	72	0.258065	0.0350758	0.0571626	0.976038	1	5.4759e-91	1	1	1	1	1	1	1	1	1	1	1	1
CCDC167	5	279	66	0.236559	0.000346611	0.000725935	0.999888	1	2.66108e-72	1	1	1	1	0.743047	1	1	1	1	1	1	0.99999
AFAP1L1	5	279	64	0.229391	8.90527e-05	0.000194314	0.99998	1	1.43103e-77	0.936594	1	1	1	1	1	1	1	1	1	1	1
C6orf15	5	279	74	0.265233	0.367421	0.508249	0.673916	1	1.93367e-90	0.958904	1	1	1	1	1	1	1	1	1	1	1
GOLT1A	5	279	68	0.243728	0.104499	0.156824	0.922051	1	1.05929e-82	1	1	1	1	0.982876	1	1	1	1	1	1	1
MTCH1	5	279	64	0.229391	0.0020619	0.00393876	0.999142	1	8.26436e-75	1	1	1	1	0.891857	1	1	1	1	1	1	1
ZC3H11A	5	279	104	0.37276	0.0569763	0.0902931	0.949071	1	2.57851e-121	1	1	1	1	0.944845	1	1	0.998343	1	1	1	1
TMEM81	5	279	78	0.27957	0.0364054	0.0592369	0.973596	1	4.25162e-50	1	1	1	1	3.00467e-11	1	1	1	1	1	1	1
ZNF713	5	279	81	0.290323	0.0930021	0.14099	0.924843	1	6.8026e-89	1	1	1	1	0.855153	1	1	1	1	1	1	0.999988
SOCS2	5	279	77	0.275986	0.00799288	0.014202	0.995074	1	8.64787e-89	1	1	1	1	0.942414	1	1	1	1	0.999999	1	1
LIFR	5	279	76	0.272401	0.0091565	0.0160508	0.994345	1	1.55732e-82	1	1	1	1	0.647253	1	1	1	1	1	1	0.999998
RPL8	6	374	87	0.23262	0.00062217	0.0012724	0.999661	1	0.996096	0.976639	0.883612	0.482546	2.2614e-06	0.99455	0.990333	0.880874	0.766155	1	1	0.685389	0.999996
RPL13	6	374	102	0.272727	0.712541	0.926659	0.292881	1	0.988417	1	0.930652	0.0113383	1	0.997798	0.779363	0.414048	0.400081	1	1	0.998839	0.999996
RPL37	6	374	108	0.28877	0.0674168	0.105263	0.938017	1	0.998989	0.990644	0.990291	0.599614	0.00157556	0.988145	0.486168	0.158168	0.623575	1	1	0.999993	1
RPS27	6	374	103	0.275401	0.995448	1	0.00435312	0.0291045	1	1	0.987945	0.298455	0.916857	0.942379	0.0387989	0.621508	0.948703	1	1	0.104916	0.999536
RPL13A	6	374	136	0.363636	0.542954	0.726958	0.439177	1	0.849274	0.980497	1	0.0400593	2.90036e-18	1	0.557772	0.330623	0.997795	1	1	0.999954	0.999999
RPL30	6	374	136	0.363636	0.77275	0.988931	0.211182	0.987725	0.999834	0.997252	1	0.244903	0.184032	0.99972	0.838318	5.36346e-09	0.964654	1	1	0.99891	1
RPL31	6	374	138	0.368984	0.139779	0.206209	0.853639	1	0.999854	0.997483	1	0.0425321	0.94035	0.988412	0.0987712	0.00158059	1.64817e-05	1	1	0.914593	0.999999
RPS16	6	374	80	0.213904	0.000545332	0.00112853	0.99974	1	0.993881	1	0.967452	0.439163	9.24598e-12	0.991687	0.923862	1	1	1	1	0.999842	1
RPL27A	6	374	128	0.342246	0.867156	1	0.123384	0.618698	0.997344	0.973737	1	0.425242	0.076323	0.981421	0.123359	0.277458	0.135709	1	1	0.67877	0.989023
RPS12	6	374	120	0.320856	0.380135	0.524445	0.616766	1	0.999534	0.994462	0.743218	0.385117	0.185273	0.99926	0.590613	0.000390014	0.000216021	1	1	0.999785	0.99999
RPL10	6	374	109	0.291444	0.0189687	0.0321174	0.983454	1	0.999052	0.947481	0.990703	0.60467	1.41828e-09	1	0.821411	0.0806658	0.894325	1	1	0.999912	0.999999
RPL39	6	374	121	0.323529	2.02209e-06	5.28581e-06	0.999999	1	0.996034	1	1	0.898463	3.17258e-55	0.999304	1	0.56475	0.977741	1	1	0.999998	1
RPL37A	6	374	131	0.350267	0.00326485	0.00609165	0.996931	1	0.997766	1	0.996421	0.22488	5.59425e-18	0.999621	0.813705	1.43279e-06	0.000227524	1	1	0.999594	1
RPS18	6	374	121	0.323529	0.0049168	0.00884177	0.99562	1	0.999563	1	0.571833	0.898463	0.0261107	1	0.433308	0.56475	0.00492422	1	1	0.812429	0.999833
RPS19	6	374	114	0.304813	0.0215115	0.0362463	0.980541	1	0.97451	0.992801	1	0.0187986	1.36759e-15	0.964652	0.84723	0.992215	1	1	1	0.956983	1
RPL18A	6	374	118	0.315508	0.0266254	0.0442201	0.97516	1	0.858304	0.993955	0.993706	0.175203	1.158e-22	0.993002	0.407602	0.214718	0.999306	1	1	0.99532	0.999998
RPL36	6	374	109	0.291444	0.000654655	0.0013336	0.999526	1	0.992172	1	1	0.14339	1.75773e-53	1	0.997041	0.944168	0.782038	1	1	0.999394	1
RPS29	6	374	117	0.312834	0.950006	1	0.0468146	0.266818	0.999434	1	0.993427	0.00580727	0.751416	0.814413	0.148625	0.00866643	0.973109	1	1	0.86436	0.999997
RPL21	6	374	103	0.275401	0.9914	1	0.00831178	0.0528609	0.956716	0.934934	1	0.298455	1	0.984612	0.785813	8.2333e-07	0.948703	1	1	0.747136	0.999978
RPS3	6	374	116	0.31016	0.635134	0.837478	0.360778	1	0.999396	0.959216	1	0.0203059	0.744661	0.992219	0.390432	0.000921626	3.30852e-06	1	1	0.857749	0.999916
RPL18	6	374	99	0.264706	0.000315833	0.000665483	0.999808	1	0.986317	1	1	1	9.64367e-40	0.99736	0.892215	0.985174	0.983416	1	1	0.999981	0.999999
RPL35A	6	374	110	0.294118	0.0321818	0.0525284	0.971057	1	1	0.949335	0.947743	0.609679	1.29461e-12	0.998644	0.9287	0.672883	0.326091	1	1	0.99992	1
RPL34	6	374	116	0.31016	0.138366	0.204703	0.864979	1	0.999396	0.993403	0.993135	0.0203059	0.418707	0.90983	0.0752525	1.907e-05	3.30852e-06	1	1	0.921556	0.999982
RPS14	6	374	110	0.294118	0.96253	1	0.0359039	0.21157	0.675303	0.847373	0.947743	0.016018	0.0657058	0.88702	0.113164	9.57561e-06	0.990806	1	1	0.5881	0.999334
RPL23A	6	374	110	0.294118	0.285553	0.399238	0.720576	1	1	1	0.991097	0.146803	3.45035e-15	0.9577	0.504232	0.302215	0.478589	1	1	0.945115	0.997965
RPLP1	6	374	105	0.280749	0.0288091	0.047469	0.974979	1	0.990203	0.989335	1	1	3.12322e-05	0.998164	0.0433919	0.266248	0.998443	1	0.999999	0.65148	0.999913
RPS27A	6	374	99	0.264706	0.386613	0.532679	0.628066	1	0.998195	1	0.985668	0.551959	0.270909	0.98107	0.759096	0.114139	0.23106	1	1	0.95038	0.99996
RPS15A	6	374	97	0.259358	0.238153	0.337033	0.777838	1	0.984716	0.919594	0.984374	0.540848	0.000534637	1	0.565788	0.00059406	0.516936	1	1	0.998164	0.999992
RPS24	6	374	91	0.243316	0.443695	0.603356	0.578393	1	1	0.98037	0.97975	0.820203	0.993233	0.903747	0.328228	0.00121427	0.000252996	1	1	0.999953	0.999979
RPL19	6	374	98	0.262032	0.698914	0.910072	0.310158	1	0.998075	0.922367	0.920247	0.546427	0.00185923	0.980068	0.75203	0.00691611	0.98251	1	1	0.99973	0.999773
RPS6	6	374	118	0.315508	0.326319	0.453801	0.67317	1	0.995295	0.962079	0.960782	0.06751	0.43632	1	0.573943	0.00108263	0.00387696	1	1	0.99532	0.999998
RPS20	6	374	83	0.221925	0.130097	0.192743	0.890549	1	0.96719	0.972201	1	0.458	0.989468	1	0.427332	0.05475	0.36827	1	0.999995	0.487653	0.999595
RPLP2	6	374	97	0.259358	0.939475	1	0.0619655	0.347473	0.854642	0.586213	0.984374	0.105115	3.89907e-09	0.997021	0.232831	0.00205149	0.981558	1	1	0.999701	0.999946
FEZ1	7	429	143	0.333333	1	1	1.32444e-30	1.72673e-28	0.260586	1	0.997877	0.748913	0.778145	0.969467	0.0644935	0.93972	0.22561	1	5.28791e-14	0.724641	0.999991
KLK6	7	429	150	0.34965	1	1	6.48959e-23	3.07666e-21	0.999261	1	0.987972	0.530133	0.54584	0.998756	0.00172648	0.000134623	0.671676	1	9.62571e-09	0.954231	0.999985
MAG	7	429	146	0.340326	1	1	1.60907e-25	9.8721e-24	0.543592	1	0.998137	0.937067	0.999682	1	0.131836	0.149166	0.245989	1	2.93944e-17	0.834767	0.999994
MOBP	7	429	134	0.312354	1	1	2.18286e-20	6.50491e-19	0.723313	1	1	0.715787	0.976473	0.955699	0.541787	0.101874	0.000849743	1	1.04715e-13	0.999689	1
MOG	7	429	147	0.342657	1	1	2.66245e-29	3.08549e-27	0.982639	1	0.948702	0.938263	0.252331	0.477987	0.640826	0.00102107	0.998809	1	4.39371e-10	0.76025	1
PPP1R14A	7	429	138	0.321678	1	1	7.79144e-21	2.52097e-19	0.751161	1	0.99736	0.112657	0.4502	0.81707	0.281463	0.026984	0.0071886	1	2.39704e-07	0.999077	0.999996
GSN	7	429	137	0.319347	1	1	6.63157e-17	1.28088e-15	0.991963	1	0.681601	0.727213	0.742054	0.539739	1.53133e-06	0.0257396	0.710494	1	8.83738e-06	0.241903	1
ELOVL1	7	429	134	0.312354	1	1	5.95512e-19	1.41163e-17	0.968705	1	0.978147	0.715787	0.976473	0.999684	0.0843145	0.0498624	0.000849743	1	2.31639e-11	0.995752	1
GJB1	7	429	133	0.310023	1	1	3.79593e-22	1.64965e-20	0.99801	1	0.977325	0.711891	0.994334	0.996864	0.0191077	0.183796	0.0503859	1	2.87706e-13	0.729137	0.999965
HSPA2	7	429	119	0.277389	1	1	2.13173e-21	7.9407e-20	0.447191	1	1	0.894511	0.610088	0.692343	0.998275	0.368809	6.10806e-05	1	3.60126e-09	0.999998	0.999998
CNDP1	7	429	122	0.284382	1	1	8.08108e-12	1.04056e-10	0.877039	1	0.966073	0.395215	0.783206	0.715186	0.00140971	0.0117018	0.43573	1	0.0219951	0.120207	0.999853
CMTM5	7	429	119	0.277389	1	1	4.70316e-31	7.00771e-29	0.999503	1	1	0.894511	1	0.999214	0.742573	0.0247767	0.165896	1	2.52411e-20	0.933569	0.999287
GPD1	7	429	113	0.263403	1	1	3.30411e-14	5.14356e-13	0.700444	1	1	0.881717	0.857726	0.643164	0.0305764	0.693378	0.667344	1	6.08324e-07	0.980518	0.999875
SLC5A11	7	429	132	0.307692	1	1	9.74383e-15	1.56351e-13	0.828763	1	1	0.917715	0.974398	0.9846	0.240179	0.0201356	0.000709279	1	1.14383e-06	0.936894	0.99996
ERMN	7	429	126	0.293706	1	1	1.70107e-19	4.43555e-18	0.793916	1	1	0.205324	0.992031	0.938883	0.990547	0.898989	1.27569e-05	1	2.49539e-10	0.999367	1
CDK18	7	429	115	0.268065	1	1	3.49098e-07	3.19394e-06	0.994421	1	0.956305	0.634006	1	0.660064	2.00986e-05	0.000848981	0.526312	1	0.000277489	0.759843	0.999996
PLLP	7	429	108	0.251748	1	1	5.17493e-24	2.84077e-22	0.342817	1	1	0.869889	0.931653	0.998469	0.996877	0.158168	0.0252115	1	1.04988e-12	0.999902	0.997446
MYLK	7	429	114	0.265734	1	1	4.09478e-12	5.40614e-11	0.83725	1	1	0.883951	0.73075	0.489943	0.1328	2.93971e-08	0.516889	1	2.24754e-06	0.912545	0.999999
TF	7	429	136	0.317016	1	1	8.55247e-18	1.85838e-16	0.211352	1	0.979706	0.244903	0.995109	0.997333	6.065e-05	0.199586	0.997795	1	3.43942e-12	0.949312	0.999911
AIF1L	7	429	106	0.247086	1	1	1.23075e-10	1.44233e-09	0.787536	1	0.824942	1	0.821607	0.741213	6.83481e-08	0.273356	0.988594	1	0.0347696	0.0419644	0.991795
ROGDI	7	429	125	0.291375	1	1	3.68791e-26	2.7475e-24	0.996845	1	0.995355	0.679116	0.905218	0.99518	0.63075	0.00184289	0.320923	1	4.90506e-16	0.991711	0.999999
S100B	7	429	111	0.258741	1	1	1.76465e-27	1.53377e-25	0.999167	1	1	1	0.374561	0.959549	0.212786	0.679817	0.488247	1	6.25369e-17	0.897384	0.999999
UGT8	7	429	120	0.27972	1	1	2.14692e-13	3.15385e-12	0.753898	1	1	0.657146	0.887441	0.922676	0.044538	1.66023e-06	0.172121	1	0.00013391	0.996004	0.99999
PLEKHB1	7	429	117	0.272727	1	1	5.32735e-16	9.74811e-15	0.977999	1	0.993427	0.890406	0.751416	0.676461	0.00691196	2.1285e-05	0.544944	1	0.00682257	0.86436	0.999984
TMEM151A	7	429	115	0.268065	1	1	4.26925e-15	7.29972e-14	0.84274	1	0.864437	0.359725	0.98646	0.991797	0.137972	0.000848981	0.371514	1	7.08775e-11	1	1
NDUFS7	7	429	103	0.240093	1	1	9.24805e-27	7.41978e-25	0.884743	1	1	0.298455	0.976078	1	0.972612	0.025923	0.0402873	1	2.21256e-14	0.917253	0.999886
SLC31A2	7	429	115	0.268065	1	1	6.58323e-18	1.46092e-16	0.409198	1	0.992831	0.359725	0.264794	0.906337	0.137972	0.00763989	0.0386145	1	0.0052364	0.850884	0.998858
FCGR3B	8	269	140	0.520446	0.0320286	0.0523602	0.966653	1	0.999872	0.938242	0.227629	0.117823	0.995982	0.965394	0.0566471	0.837374	0.970217	1	1	0.0154853	0.999947
IFITM2	8	269	126	0.468401	0.149068	0.217949	0.849356	1	0.999684	0.971722	0.00212388	0.00863072	0.999029	0.861157	0.638499	0.898989	0.999579	1	1	0.000151802	0.999693
S100A8	8	269	120	0.446097	0.218141	0.309974	0.782016	1	0.999534	0.74874	0.061843	6.78294e-05	0.998645	0.831233	0.424751	0.376281	0.847144	1	1	2.27638e-05	0.999367
AQP9	8	269	101	0.375465	0.0746243	0.115651	0.93342	1	1	0.618399	0.000256466	0.0389773	0.973725	0.701655	0.421598	0.926146	0.857259	1	1	2.13998e-05	0.994444
IL1R2	8	269	111	0.412639	0.0291453	0.0478717	0.973753	1	0.999167	0.691744	2.70058e-06	0.0546474	1	0.959549	0.931382	0.679817	0.795265	1	1	0.00180718	0.999411
MMP25	8	269	107	0.39777	0.117413	0.174945	0.889955	1	0.998921	0.943579	0.829769	0.00355188	0.997211	0.951669	0.920067	0.825714	0.768164	1	1	0.305915	0.999988
CSF3R	8	269	104	0.386617	0.389633	0.536131	0.62044	1	0.998691	0.819088	0.635352	0.0433457	1	0.72587	0.449476	0.810709	0.746116	1	1	0.00898978	0.955135
G0S2	8	269	102	0.379182	0.527251	0.709569	0.482501	1	0.998512	0.932585	0.13185	0.040402	0.99632	0.709887	0.903547	0.800113	0.998124	1	1	7.46374e-07	0.995018
S100A9	8	269	151	0.561338	0.0840647	0.128751	0.908454	1	0.999303	0.956517	0.00145452	3.60891e-06	0.999759	0.876741	0.521082	0.75481	0.981591	1	1	0.00136045	0.999849
SELL	8	269	90	0.334572	0.116826	0.174569	0.898797	1	0.99678	0.526331	0.730778	0.00131696	1	0.772016	0.498341	0.725824	0.788823	1	1	0.21219	0.999997
CXCR2	8	269	104	0.386617	0.0165075	0.0280413	0.986174	1	0.998691	0.937206	0.264953	0.303553	0.977177	0.859348	0.166911	0.810709	0.950972	1	1	0.0184789	0.999593
FCN1	8	269	87	0.32342	0.1492	0.217949	0.870452	1	1	0.714301	0.0695086	5.08834e-08	1	0.886398	0.0785234	0.0266029	0.995244	1	1	0.546527	0.999961
S100A12	8	269	107	0.39777	0.023427	0.0392835	0.979613	1	1	0.833744	0.0335818	7.29554e-09	0.997211	0.951669	0.477059	0.152931	0.61444	1	1	0.0121352	0.999998
ABTB1	8	269	71	0.263941	0.21777	0.309869	0.819858	1	0.989107	1	0.802318	0.00191459	0.979577	0.786462	0.158134	0.56743	0.800714	1	1	0.00498834	0.999554
APOBEC3A	8	269	92	0.342007	0.0574947	0.0904479	0.952006	1	1	0.981207	0.537636	4.52519e-05	0.993597	0.972887	0.992611	0.979986	0.975988	1	1	1.20641e-05	1
CXCR1	8	269	84	0.312268	0.0181048	0.0307046	0.986994	1	0.995266	1	0.0597218	0.464199	0.990034	0.72339	0.0667236	0.681323	0.994274	1	1	0.502578	1
ADGRG3	8	269	86	0.319703	0.00224496	0.00426502	0.998634	1	0.995837	0.9756	9.36611e-09	0.00100646	1	0.963247	0.458093	0.876812	0.967149	1	1	0.000348172	0.999995
HLA-B	8	269	93	0.345725	0.0276919	0.0457005	0.977862	1	0.997344	1	0.0148386	0.0935549	1	0.996206	0.527773	1	0.809706	1	1	0.360395	0.893805
JAML	8	269	76	0.282528	0.145173	0.213863	0.881512	1	1	0.624737	0.96133	7.21052e-05	1	0.647253	0.354638	0.384847	1	1	1	0.381281	0.995896
MME	8	269	74	0.275093	0.103384	0.155374	0.919475	1	0.991011	0.958904	0.601198	0.00236773	1	0.93326	0.180878	0.595801	0.646124	1	1	0.0738725	0.999998
NCF1C	8	269	74	0.275093	0.598041	0.793584	0.440252	1	0.991011	0.60655	0.601198	0.157452	1	0.988067	0.180878	0.0842541	0.939241	1	1	0.0372107	0.98444
FFAR2	8	269	76	0.282528	0.0091565	0.0160508	0.994345	1	0.992092	0.962321	0.0131915	0.00271186	0.9845	0.823635	0.354638	1	0.945092	1	1	0.381281	0.995896
PROK2	8	269	84	0.312268	0.0374113	0.0604025	0.971414	1	1	0.973383	0.0229823	0.000874595	0.990034	0.871611	0.0667236	0.868306	0.994274	1	1	7.65557e-06	0.999937
VNN2	8	269	92	0.342007	0.156518	0.227682	0.860398	1	0.997168	0.904283	0.337096	0.242965	1	0.620494	0.706295	0.979986	0.802939	1	1	0.000115485	0.999488
PTGS2	8	269	75	0.27881	0.346189	0.480153	0.693487	1	1	1	0.610375	0.407012	1	0.816673	0.0382383	0.958581	0.990008	1	1	0.144538	0.864193
SLC25A37	8	269	72	0.267658	0.0697741	0.10864	0.948636	1	0.989782	0.812093	0.179724	0.000341446	1	0.604387	0.0309436	1	1	1	1	0.0623031	0.999616
ADH7	9	170	74	0.435294	6.46838e-08	2.10829e-07	1	1	1	1	1	1	1	1	1	1	1	1	1	1	1
KRT4	9	170	85	0.5	1.21977e-07	3.8906e-07	1	1	1	1	1	1	1	1	1	1	1	1	1	1	1
POU2AF1	9	170	79	0.464706	3.12799e-05	7.13894e-05	0.99999	1	1	1	1	1	1	0.99117	0.920496	1	1	1	1	1	1
IGLL5	9	170	111	0.652941	4.42002e-10	2.58659e-09	1	1	1	1	1	1	1	1	0.981006	1	1	1	1	1	1
MZB1	9	170	124	0.729412	1.18551e-06	3.24537e-06	0.999999	1	1	1	1	1	1	0.994915	0.958754	1	1	1	1	1	1
JCHAIN	9	170	126	0.741176	2.97977e-09	1.33386e-08	1	1	1	1	1	1	1	0.979606	0.990547	1	1	1	1	1	1
IRF4	9	170	97	0.570588	9.22183e-09	3.69937e-08	1	1	1	1	1	1	1	0.997021	0.964076	1	1	1	1	0.999976	0.999992
CD79A	9	170	93	0.547059	2.14208e-06	5.58546e-06	0.999999	1	1	1	1	1	1	0.996206	0.957026	1	1	1	1	1	0.999998
FAM46C	9	170	72	0.423529	1.94622e-06	5.11311e-06	1	1	1	1	1	1	1	1	0.892733	1	1	1	0.999998	0.94768	0.999996
SLAMF7	9	170	82	0.482353	1.06588e-08	4.21104e-08	1	1	1	0.970966	1	1	1	0.992631	0.930197	1	1	1	1	0.992954	0.99999
FKBP11	9	170	81	0.476471	2.14367e-05	4.94656e-05	0.999993	1	1	0.860605	0.968825	1	1	1	0.927094	1	1	1	0.999992	0.930407	0.999999
DERL3	9	170	84	0.494118	1.66544e-06	4.40876e-06	1	1	1	1	1	1	1	0.959358	0.936032	1	1	1	1	0.999898	0.999937
CD27	9	170	69	0.405882	0.000200689	0.000429812	0.999936	1	1	1	0.947732	1	1	1	0.878275	1	1	1	1	0.999469	0.999994
SSR4	9	170	67	0.394118	3.12643e-07	9.31676e-07	1	1	1	0.779076	1	1	1	1	0.86766	1	1	1	0.999431	0.999339	1
CD38	9	170	65	0.382353	4.90216e-07	1.40466e-06	1	1	1	1	1	1	1	0.97949	0.856205	1	1	1	1	1	1
UPK1B	9	170	81	0.476471	2.86986e-07	8.57668e-07	1	1	1	1	1	1	1	1	0.986659	1	1	1	1	1	1
XBP1	9	170	61	0.358824	1.20462e-06	3.24655e-06	1	1	1	0.927795	1	1	1	0.973916	0.830548	1	1	1	1	0.767079	1
CRABP1	10	226	128	0.566372	1.07129e-11	1.04425e-10	1	1	1	1	1	1	1	0.757304	0.653706	1	1	1	1	1	1.20332e-78
IGFBPL1	10	226	118	0.522124	1.47858e-09	7.13962e-09	1	1	1	1	1	1	0.998486	0.970519	0.73584	0.993446	1	1	1	1	6.88818e-76
CALB2	10	226	97	0.429204	3.59992e-10	2.14555e-09	1	1	1	1	1	1	1	1	0.964076	0.983846	1	1	1	1	1.66145e-72
LOC102723471	10	226	92	0.40708	1.11486e-09	5.69998e-09	1	1	1	1	1	1	1	1	0.992611	1	1	1	1	1	1.19989e-70
BLK	10	226	92	0.40708	1.11486e-09	5.69998e-09	1	1	1	1	1	1	1	1	1	1	1	1	1	1	8.41668e-76
KCNQ1-AS1	10	226	105	0.464602	5.88659e-11	4.44907e-10	1	1	1	1	1	1	1	1	1	1	1	1	1	1	1.09786e-86
NHLH2	10	226	102	0.451327	1.16121e-10	8.0743e-10	1	1	1	1	1	1	1	1	1	1	1	1	1	1	2.18034e-81
CPLX3	10	226	95	0.420354	5.65872e-10	3.15617e-09	1	1	1	1	1	1	1	1	1	1	1	1	1	1	2.62801e-78
MYBPHL	10	226	85	0.376106	5.41692e-09	2.242e-08	1	1	1	1	1	1	1	1	1	1	1	1	1	1	2.81307e-67
NHLH1	10	226	88	0.389381	2.7519e-09	1.24252e-08	1	1	1	1	1	1	1	0.966778	0.946346	0.976246	1	1	1	1	3.73685e-59
GNG3	10	226	75	0.331858	5.16384e-08	1.7012e-07	1	1	1	1	1	1	1	1	0.981595	1	1	1	1	1	4.85038e-59
MFAP2	10	226	81	0.358407	2.86986e-07	8.57668e-07	1	1	1	1	1	1	1	1	1	0.96795	1	1	1	1	5.61774e-64
SCGB1D2	10	226	95	0.420354	5.65872e-10	3.15617e-09	1	1	1	1	1	1	1	1	1	1	1	1	1	1	2.62801e-78
SYT1	10	226	91	0.402655	1.39749e-09	6.81115e-09	1	1	1	1	1	1	0.993233	1	0.69811	1	1	1	1	1	1.7822e-63
MLLT11	10	226	72	0.318584	1.84633e-05	4.33722e-05	0.999996	1	1	1	1	1	1	0.604387	0.313243	0.952919	1	1	0.999998	1	2.04707e-38
NGB	10	226	82	0.362832	1.06588e-08	4.21104e-08	1	1	1	1	1	1	1	1	1	1	1	1	1	1	1.77726e-67
RPL13A	11	251	102	0.406375	0.427698	0.583886	0.583728	1	0.602008	0.932585	1	0.00271333	2.32721e-24	1	0.779363	0.613772	0.998124	1	1	0.999986	0.999869
RPL37A	11	251	82	0.326693	0.0229657	0.0386343	0.983459	1	0.965377	1	1	0.19431	2.93287e-26	1	0.617239	0.0063805	0.872174	1	1	0.998661	1
RPL39	11	251	121	0.482072	2.02209e-06	5.28581e-06	0.999999	1	0.996034	1	0.994474	0.898463	1.07286e-73	1	1	0.743515	0.994949	1	1	0.999998	1
RPL18A	11	251	101	0.40239	0.0746243	0.115651	0.93342	1	0.750925	0.987302	1	0.0389773	4.04976e-29	0.98293	0.899894	0.405772	1	1	1	0.982849	1
RPL36	11	251	127	0.505976	1.25664e-05	2.99241e-05	0.999991	1	0.997187	1	1	0.420269	4.21959e-86	1	0.998881	0.970675	0.948448	1	1	0.99772	1
RPL18	11	251	91	0.36255	0.000329015	0.000690467	0.999821	1	0.92444	1	1	1	3.11486e-59	0.995719	0.953023	0.97911	0.996288	1	1	0.999953	0.999998
RPL23A	11	251	80	0.318725	0.166437	0.241102	0.859307	1	1	1	1	0.184893	3.89193e-23	1	0.597554	0.422592	0.955227	1	1	0.971196	0.997528
RPL7	11	251	108	0.430279	1.19892e-08	4.66596e-08	1	1	1	1	1	1	3.05166e-99	1	0.996877	0.942168	1	1	1	0.999993	1
RPS15	11	251	111	0.442231	4.6397e-05	0.000104293	0.999971	1	0.526075	1	0.991474	0.877119	3.68321e-95	1	1	0.991144	1	1	1	0.997671	1
RPS21	11	251	121	0.482072	0.00218402	0.00415681	0.99812	1	0.981949	1	1	0.186314	5.17333e-77	0.999304	0.988053	0.743515	0.994949	1	1	0.999974	1
RPS4X	11	251	103	0.410359	3.38879e-08	1.17817e-07	1	1	0.989045	0.988363	0.987945	0.85689	3.87944e-103	1	1	0.987512	1	1	1	0.999837	1
RPS19	11	251	76	0.302789	0.0853451	0.129759	0.933856	1	0.853869	0.962321	1	0.0130465	1.12634e-21	0.939504	0.90954	0.960313	1	1	1	0.961051	1
SNHG25	11	251	97	0.386454	9.22183e-09	3.69937e-08	1	1	1	1	0.984374	0.839583	6.64083e-119	1	1	1	1	1	1	0.999976	1
RPS5	11	251	86	0.342629	0.000728219	0.00147482	0.999603	1	0.155598	0.706892	1	0.00502295	1.7352e-45	1	0.941403	1	1	1	1	0.9991	1
GKN1	12	167	152	0.91018	0.525338	0.707916	0.446297	1	1	1	1	1	0.999772	1	5.46105e-211	1	1	1	1	1	1
LCN2	12	167	60	0.359281	0.873666	1	0.154885	0.754884	1	1	1	1	0.0966548	1	1.18158e-64	1	1	1	1	1	1
TFF1	12	167	153	0.916168	0.991351	1	0.00653938	0.0423638	1	1	1	1	0.0152125	1	5.54843e-173	1	1	1	1	1	1
GKN2	12	167	149	0.892216	0.652816	0.858622	0.32126	1	1	1	1	1	0.997426	1	6.18396e-203	1	1	1	1	1	1
MUC5AC	12	167	150	0.898204	0.775255	0.989707	0.20215	0.954038	1	1	1	1	0.90666	1	3.72478e-195	1	1	1	1	1	1
AGR2	12	167	101	0.60479	0.643091	0.846899	0.364951	1	1	1	1	0.851338	0.448282	1	5.10979e-118	1	1	1	1	1	1
CLDN18	12	167	114	0.682635	0.987276	1	0.0116733	0.0733451	1	1	1	0.883951	0.257188	1	2.4164e-131	1	1	1	1	1	1
PSCA	12	167	115	0.688623	0.148463	0.217787	0.85534	1	1	1	1	1	1	1	1.17567e-158	1	1	1	1	1	1
SPINK1	12	167	108	0.646707	0.970336	1	0.0285517	0.172136	1	1	1	1	0.348173	1	7.00921e-128	1	1	1	1	1	1
DPCR1	12	167	66	0.39521	0.555027	0.74122	0.496065	1	1	1	1	0.711177	0.46676	1	5.71613e-75	1	1	1	1	1	1
TFF2	12	167	151	0.904192	0.904938	1	0.0812926	0.434811	1	1	1	1	0.176761	1	4.01095e-180	1	1	1	1	1	1
PIGR	12	167	57	0.341317	0.951862	1	0.0625665	0.348967	1	1	1	1	0.029876	1	1.65455e-58	1	1	1	1	1	1
TSPAN1	12	167	58	0.347305	0.900574	1	0.124721	0.622414	1	1	1	1	0.958213	1	1.35214e-74	1	1	1	1	1	1
APLP1	13	272	142	0.522059	1	1	3.2765e-10	3.71456e-09	0.509333	0.997888	0.997782	0.269437	1	0.968162	0.0618026	0.000711496	2.61465e-05	1	0.00210808	0.983389	1
CNP	13	272	128	0.470588	1	1	6.40859e-15	1.0444e-13	0.0491822	0.996098	1	0.691745	0.999132	0.995896	0.998939	0.0819784	0.00133641	1	2.66338e-12	0.999987	1
CARNS1	13	272	127	0.466912	1	1	5.82612e-11	7.06586e-10	0.669694	0.972747	1	1	1	0.941263	0.990981	0.00021139	1.44675e-05	1	9.38571e-07	0.99989	1
GJB1	13	272	92	0.338235	1	1	8.26701e-20	2.3304e-18	0.997168	1	0.980606	0.51226	0.993597	0.972887	0.100789	0.331114	0.044435	1	1.61005e-12	0.988749	0.999982
GJC2	13	272	110	0.404412	1	1	1.13804e-11	1.44754e-10	0.361685	0.991426	1	0.874755	0.997638	0.88702	0.504232	0.168885	0.00193982	1	0.000106939	0.997464	1
SEMA3B	13	272	100	0.367647	1	1	8.73326e-20	2.39705e-18	0.95014	1	1	0.848482	1	0.837854	0.968621	0.021846	0.033442	1	8.87624e-10	0.953469	0.999995
MOBP	13	272	116	0.426471	1	1	3.11075e-16	5.79377e-15	0.724251	1	1	0.888295	0.998308	0.90983	0.248211	0.202846	0.000426628	1	3.78995e-10	0.999957	1
TMEM144	13	272	106	0.389706	1	1	1.85611e-12	2.48196e-11	0.113884	0.98979	0.989413	0.313762	1	0.741213	0.305447	0.0710011	0.0013277	1	0.000115267	0.988188	1
ENPP2	13	272	98	0.360294	1	1	1.4459e-11	1.81695e-10	0.0160759	0.985529	1	0.842605	1	0.676004	0.39355	0.0488527	0.360585	1	2.5184e-07	0.978633	1
SCD	13	272	95	0.349265	1	1	3.832e-09	4.07834e-08	0.0300144	0.913767	1	0.257954	1	0.918672	0.729882	0.198352	0.199242	1	0.0174394	0.973464	0.999989
CXCL3	14	212	129	0.608491	1.44921e-10	9.86252e-10	1	1	1	0.913118	4.36814e-25	0.0908394	1	1	1	0.995919	1	1	1	9.77634e-41	1
CXCL1	14	212	135	0.636792	4.11075e-09	1.76441e-08	1	1	1	0.997129	3.72682e-20	0.00342604	1	0.999703	0.99382	1	1	1	1	1.66399e-51	1
CXCL5	14	212	127	0.599057	2.21398e-10	1.40804e-09	1	1	1	1	9.60422e-29	0.909459	1	0.999516	1	1	1	1	1	1.04651e-49	1
CXCL8	14	212	120	0.566038	4.76217e-07	1.38355e-06	1	1	1	0.96475	3.14932e-24	3.28478e-08	1	0.99926	0.998366	0.993987	0.999387	1	1	7.47572e-25	1
C15orf48	14	212	77	0.363208	3.29059e-08	1.15171e-07	1	1	1	0.840647	2.24422e-12	0.00289738	1	0.990039	0.983466	1	1	1	0.99988	3.27148e-19	0.999061
CXCL6	14	212	61	0.287736	1.97148e-05	4.60011e-05	0.999998	1	1	0.927795	0.108921	1	1	1	0.961052	1	1	1	1	1.30859e-46	1
MCEMP1	14	212	94	0.443396	5.11084e-05	0.000114391	0.999976	1	1	0.982774	8.66277e-29	0.00772148	1	0.996429	0.993364	1	1	1	1	1.01542e-20	1
MARCO	14	212	76	0.358491	8.32627e-06	2.06278e-05	0.999998	1	1	0.962321	1.69775e-22	0.761002	1	0.989421	1	1	1	1	0.999999	1.77895e-20	0.999973
MMP9	14	212	73	0.34434	1.5746e-06	4.18956e-06	1	1	1	0.818145	0.186878	0.153011	1	1	0.979512	1	1	1	1	1.04289e-47	0.999997
FTH1	14	212	81	0.382075	3.05266e-06	7.84219e-06	0.999999	1	1	0.969676	3.23458e-19	0.000702774	1	0.952778	0.986659	1	0.993105	1	0.999992	1.65961e-15	0.999988
CNP	15	260	116	0.446154	1	1	6.00275e-13	8.23798e-12	0.0246313	1	1	0.638729	1	1	1	0.526751	8.45331e-07	1	1.3564e-09	0.999997	0.999982
CSRP1	15	260	132	0.507692	1	1	6.65896e-21	2.24042e-19	0.109571	1	1	0.0353941	0.99405	1	0.999146	0.975554	1.86743e-09	1	1.48962e-07	1	0.999854
MAG	15	260	102	0.392308	1	1	7.97623e-21	2.52097e-19	0.172173	1	1	0.85414	1	1	1	0.414048	0.0379058	1	2.5688e-15	0.99982	0.998244
MAL	15	260	121	0.465385	1	1	2.60069e-19	6.61589e-18	0.121919	1	1	0.390171	0.989851	1	0.988053	0.126711	4.53921e-07	1	2.87927e-05	1	0.999991
RNASE1	15	260	105	0.403846	1	1	4.00441e-09	4.21879e-08	0.00459522	1	1	0.308656	1	1	0.974995	0.636686	3.61624e-05	1	0.00244394	0.999867	1
GPRC5B	15	260	90	0.346154	1	1	2.43011e-13	3.52028e-12	0.098916	1	1	0.0853094	0.992848	1	0.991772	0.978195	0.00641014	1	0.00434732	0.999947	0.992977
PLLP	15	260	106	0.407692	1	1	1.31933e-19	3.52835e-18	0.0590668	1	1	0.864836	0.97923	1	1	0.273356	0.0013277	1	3.55931e-11	1	0.998914
CBR1	15	260	100	0.384615	1	1	1.27934e-20	3.92456e-19	0.74307	1	1	0.114195	0.906637	0.997515	1	0.789028	1.81929e-05	1	2.25035e-10	0.998605	0.997775
2021-09-04	15	260	138	0.530769	1	1	1.43073e-21	5.52685e-20	0.751161	1	1	0.926641	0.980155	0.999752	1	0.929664	5.38851e-09	1	3.1627e-09	0.999996	0.999931
DNAJB1	16	230	123	0.534783	1	1	5.78532e-09	6.03409e-08	0.996462	0.00183038	0.40595	1	1	0.976564	0.957078	0.96611	0.999492	1	0.997797	0.0031704	0.689343
HSP90AA1	16	230	122	0.530435	1	1	1.08295e-10	1.28354e-09	0.947186	0.00015976	0.579244	0.900383	1	0.928463	0.988598	0.886358	1	1	0.999979	0.00284526	0.835612
BAG3	16	230	105	0.456522	1	1	2.33929e-15	4.1354e-14	0.990203	6.32568e-06	0.64287	0.862238	1	0.998164	0.798262	0.935752	1	1	0.999778	0.00995534	0.616612
HSPA1A	16	230	139	0.604348	1	1	1.08779e-08	1.10152e-07	0.863311	0.0134645	0.52391	0.734615	1	0.699936	0.933798	0.931791	0.998135	1	1	0.0261689	0.968136
HSPA1B	16	230	119	0.517391	0.999996	1	0.000102122	0.000806918	0.940011	0.0616408	0.556814	0.894511	1	0.692343	0.416181	0.731595	0.994364	1	0.999993	6.59921e-06	0.953901
HSPH1	16	230	103	0.447826	1	1	1.86945e-09	2.0743e-08	0.998604	4.89332e-06	0.809758	0.85689	1	0.984612	0.972612	0.931107	0.998237	1	0.999709	0.00810106	0.951269
UBC	16	230	92	0.4	1	1	7.21794e-13	9.77703e-12	1	0.0145566	0.337096	1	1	0.99597	0.706295	0.89939	1	1	0.998747	0.000328025	0.7233
HSP90AB1	16	230	82	0.356522	1	1	5.23705e-08	4.96568e-07	0.994618	0.128969	0.447269	1	1	0.705575	1	0.969292	1	1	0.970422	1.71797e-05	0.552512
HLA-DPB1	17	237	140	0.590717	0.559441	0.746159	0.419827	1	0.634035	1.29009e-08	0.982508	0.0148697	0.981783	0.0599391	5.89719e-21	0.0296026	1	1	1	0.695848	0.970512
HLA-DRA	17	237	142	0.599156	0.440894	0.601115	0.623649	1	0.509333	0.0157442	0.545082	0.00120151	0.339405	0.581248	8.91535e-20	1.20884e-06	1	1	1	0.806171	1
CD74	17	237	126	0.531646	0.149068	0.217949	0.849356	1	0.793916	0.277335	0.428495	0.0841051	0.665532	0.303356	6.31646e-24	3.34571e-08	1	1	1	0.423553	0.999979
HLA-DPA1	17	237	129	0.544304	0.899593	1	0.092018	0.484721	0.999739	6.72347e-08	0.792324	0.000124977	0.993113	0.0681732	9.63242e-05	1.84061e-09	0.99965	1	1	0.0116606	0.995516
HLA-DQA1	17	237	101	0.42616	0.349342	0.483883	0.753633	1	1.21775e-07	1	1	1	1	0.000191058	2.2993e-11	0.000857963	1	1	1	0.956384	0.836014
HLA-DMA	17	237	92	0.388186	0.156518	0.227682	0.914709	1	0.333917	0.000106124	0.901864	0.242965	0.960087	0.440597	7.81323e-10	0.000363222	1	1	0.99993	0.086861	0.998138
HLA-DRB1	17	237	117	0.493671	0.342916	0.476247	0.741609	1	1.78138e-06	0.993685	1	1	0.987697	0.00103164	7.46445e-14	5.45651e-12	1	1	1	0.998609	0.999722
MS4A6A	17	237	86	0.362869	0.240965	0.34055	0.784135	1	0.000656828	0.0271501	1	0.476472	0.947473	0.122021	0.0744599	4.40339e-05	0.99494	1	1	0.000954159	0.896889
CLSPN	18	202	94	0.465347	0.0472564	0.0755957	0.960571	1	0.354225	0.561077	1	1	0.742532	0.174398	0.993364	1	1	1	0.79267	0.373984	5.02087e-14
PCLAF	18	202	115	0.569307	8.61412e-05	0.000188751	0.999941	1	0.00420766	0.533042	1	1	0.98646	0.499298	0.984209	0.992543	1	1	0.0507846	0.404357	4.12689e-09
ATAD2	18	202	101	0.5	0.120567	0.179388	0.889726	1	0.00834429	1	1	1	0.973725	0.000191058	0.772761	1	1	1	0.605784	0.601406	6.62096e-09
ASF1B	18	202	95	0.470297	0.0105451	0.0183004	0.991991	1	3.76253e-08	0.569547	0.982963	1	0.965252	0.181568	0.729882	0.9824	1	1	0.206593	0.655082	0.00605816
E2F8	18	202	84	0.415842	0.188068	0.269075	0.836159	1	0.000513809	0.471908	0.871206	1	0.942483	0.000947438	0.141118	1	1	1	0.746627	0.243456	0.0660085
RRM2	18	202	118	0.584158	0.0771286	0.119178	0.925448	1	5.30216e-07	0.375219	0.87575	1	0.758037	0.000126625	0.154101	0.993446	1	1	0.151089	0.441999	0.794694
ZWINT	18	202	77	0.381188	0.000226125	0.000483297	0.999909	1	0.018409	0.840647	0.96296	1	0.985332	0.154919	0.100711	0.961973	1	1	0.740768	0.396531	8.90256e-06
HBA1	19	154	75	0.487013	1	1	7.91829e-17	1.5016e-15	1	1	0.959628	0.75643	0.913946	2.64219e-60	1	0.0885869	1	1	1	0.798498	1
HBE1	19	154	98	0.636364	1	1	4.12939e-33	7.17826e-31	1	1	0.985035	0.273067	0.995406	1.29512e-101	1	1	1	1	1	0.993087	1
HBG1	19	154	119	0.772727	1	1	5.18227e-23	2.57386e-21	1	1	1	0.894511	0.764526	2.13235e-88	0.998275	0.220749	0.999348	1	1	0.575934	1
HBG2	19	154	119	0.772727	1	1	4.32538e-19	1.07414e-17	1	1	1	0.178881	0.4451	6.09788e-78	0.998275	0.056932	0.999348	1	1	0.795938	1
HBZ	19	154	92	0.597403	1	1	3.74445e-35	9.76364e-33	1	1	1	1	0.727067	3.37634e-108	1	1	1	1	1	1	1
COL3A1	19	154	83	0.538961	1	1	3.3853e-21	1.21754e-19	1	1	1	2.5246e-06	0.0307571	1.15119e-62	1	1	1	1	1	1	1
MYL7	19	154	96	0.623377	1	1	3.86493e-34	8.06224e-32	1	1	1	1.5493e-10	0.966826	2.80622e-84	1	1	1	1	1	1	1
CD163	20	201	128	0.636816	0.00463999	0.00835839	0.995675	1	0.000739137	0.629163	4.80564e-06	0.425242	0.992769	0.461573	0.0652371	0.782083	0.999628	1	0.999998	2.08136e-12	0.997975
F13A1	20	201	104	0.517413	0.00133012	0.00265261	0.999044	1	0.958721	0.98886	0.0286282	0.303553	0.996706	0.561307	0.0410513	0.137722	1	1	0.999105	6.42671e-27	1
CD14	20	201	91	0.452736	0.000329015	0.000690467	0.999821	1	1	0.182037	8.04942e-07	0.506406	0.868858	0.779433	0.000203669	0.173235	0.996288	1	0.999918	2.8265e-09	0.999871
CLEC5A	20	201	77	0.383085	4.55556e-05	0.000102623	0.999986	1	0.00684321	0.0418191	0.216473	1	0.921252	0.990039	0.100711	1	1	1	0.99988	2.42863e-11	0.699507
CD93	20	201	78	0.38806	0.000189809	0.000409031	0.999924	1	0.00258463	0.41536	0.224093	0.769893	1	0.945191	0.375449	0.839468	1	1	0.999897	3.72794e-16	0.943989
TGFBI	20	201	116	0.577114	0.000671478	0.00136255	0.999478	1	0.931961	0.054051	8.19783e-05	1	0.987093	0.668326	0.00643391	0.712948	1	1	0.99999	2.56575e-11	0.483927
FCGBP	20	201	89	0.442786	0.000120775	0.000261889	0.999943	1	0.0447869	0.517441	0.03122	0.0826441	0.702594	0.895394	0.845422	1	1	1	0.967833	4.83182e-20	1
ARL14EP	21	149	100	0.671141	0.661976	0.868479	0.346447	1	1	1	1	1	1	1	0.995195	1	1	1	1	5.64394e-97	1
CSTF3	21	149	92	0.61745	0.527925	0.709569	0.491694	1	0.997168	1	1	1	1	0.972887	1	1	1	1	1	2.82014e-75	0.999982
EIF3M	21	149	105	0.704698	0.280685	0.392958	0.72933	1	1	1	1	1	1	0.998164	1	1	0.998443	1	0.999999	1.64102e-90	1
IMMP1L	21	149	83	0.557047	0.912022	1	0.0962436	0.50191	1	1	1	1	1	1	1	1	1	1	0.99607	2.62623e-70	1
DNAJC24	21	149	85	0.57047	0.673297	0.882222	0.348875	1	0.995561	1	1	1	1	0.993851	1	1	1	1	1	5.80166e-79	1
ELP4	21	149	77	0.516779	0.88188	1	0.132541	0.653394	1	1	1	1	1	1	0.983466	1	1	1	1	1.58814e-68	0.999819
RCN1	21	149	93	0.624161	0.900706	1	0.103799	0.53331	1	1	1	1	1	0.996206	0.992997	1	0.996721	1	1	2.06274e-80	0.999998
ALDOA	22	213	130	0.610329	1.17222e-10	8.09687e-10	1	1	0.000890416	1	0.996262	0.914506	0.694899	1	0.999048	1	1	1	6.35636e-42	0.999917	0.998368
PGK1	22	213	120	0.56338	9.70733e-10	5.13946e-09	1	1	0.610148	0.96475	1	1	0.000543029	1	0.987482	0.993987	1	1	2.0862e-33	0.999971	0.989216
BNIP3	22	213	96	0.450704	4.51351e-10	2.58659e-09	1	1	0.849024	1	0.914511	1	0.757326	1	1	0.983139	1	1	1.28459e-30	0.999973	0.354722
ENO1	22	213	107	0.502347	3.74174e-11	3.04894e-10	1	1	0.991241	1	0.989861	1	0.980189	1	0.977178	1	1	1	7.66484e-44	0.999892	0.744
LDHA	22	213	104	0.488263	1.65523e-06	4.3929e-06	0.999999	1	0.0246439	0.98886	0.988456	0.57891	0.0212471	1	0.996126	1	1	1	2.4883e-16	0.995794	0.387409
GAPDH	22	213	93	0.43662	2.66241e-07	8.02572e-07	1	1	1.23239e-07	0.907547	0.546274	1	1.31195e-06	0.996206	0.957026	0.980825	1	1	1.76423e-07	0.999553	0.998355
TPI1	22	213	114	0.535211	2.47193e-07	7.583e-07	1	1	0.000520229	0.992801	0.518193	0.629236	0.0794554	0.998936	0.997741	1	1	1	3.06423e-19	0.999947	0.825588
AQP4	23	156	98	0.628205	0.0573235	0.0904479	0.973744	1	0.0160759	0.0212428	1	1	0.899207	2.3115e-08	1.59294e-08	0.77744	0.997595	1	0.998111	0.561734	0.961538
GFAP	23	156	94	0.602564	0.00199597	0.00381981	0.998675	1	0.934118	7.52973e-09	0.353799	1	0.963606	0.0188831	7.21197e-09	0.752706	1	1	0.999035	0.932005	0.32112
AQP1	23	156	81	0.519231	0.0258184	0.0430169	0.981376	1	9.64759e-05	2.63703e-08	1	1	0.988238	0.00216772	8.39177e-13	1	1	1	1	0.992307	0.915542
GJA1	23	156	80	0.512821	0.0571366	0.0902931	0.979054	1	0.00320997	0.00010887	1	1	0.931125	0.315035	4.04206e-11	0.648816	0.992665	1	0.998272	0.032296	0.999885
DCLK1	23	156	73	0.467949	0.0136723	0.0233773	0.991493	1	0.834233	0.00323903	0.955998	1	1	1.32258e-05	6.17574e-07	0.954887	0.988694	1	0.999971	0.335879	0.174713
ITM2C	23	156	92	0.589744	0.098556	0.148977	0.914709	1	0.0541105	0.090648	0.744402	1	0.993597	3.79034e-06	2.73105e-08	1	0.996511	1	0.999989	0.0116934	0.814591
ID3	23	156	73	0.467949	0.00168942	0.00331279	0.999182	1	0.944136	4.91312e-09	0.186878	1	0.90601	2.7856e-06	0.00115923	1	1	1	0.929799	1	0.627729
ANLN	24	217	121	0.557604	1	1	2.93641e-09	3.22387e-08	1.14493e-05	0.889378	0.994474	0.390171	0.626436	0.554143	0.878043	0.0620042	0.581252	1	0.0849959	0.996309	1
CLDND1	24	217	122	0.562212	1	1	3.31076e-07	3.08314e-06	0.000137998	0.994926	0.754834	0.395215	0.990329	0.715186	0.0228087	3.6155e-05	0.106316	1	0.036897	0.999977	1
ENPP2	24	217	95	0.437788	1	1	4.74877e-08	4.54401e-07	0.00178799	0.983508	1	0.833365	0.994576	0.308481	0.115686	0.0161085	0.4963	1	0.0174394	0.936101	0.999999
2021-09-08	24	217	93	0.428571	1	1	2.40955e-06	2.16651e-05	0.115205	0.982007	1	0.0935549	0.734884	0.630124	0.527773	0.74619	0.184051	1	0.180164	0.969396	0.999984
TF	24	217	102	0.470046	1	1	1.55546e-08	1.53051e-07	0.0214826	1	0.804456	0.293363	0.99632	0.983792	0.00208901	0.0592732	0.985867	1	2.40354e-06	0.995032	0.999869
TMEM144	24	217	87	0.400922	1	1	3.38008e-07	3.11984e-06	0.016617	0.886293	0.975933	0.218347	0.991557	0.570207	0.0785234	0.0672344	0.0319171	1	0.0399884	0.983255	0.999996
SERPINI1	24	217	104	0.479263	0.999999	1	0.000591291	0.00437388	0.186354	0.98886	0.935362	0.303553	0.313368	0.944845	0.0869806	0.00111471	0.273123	1	0.550749	0.999035	0.999997
CDCA3	25	182	93	0.510989	0.00229831	0.00435843	0.998474	1	0.0574836	0.194875	0.981425	0.826908	1	0.0175466	0.865931	1	0.920017	1	0.978215	0.856886	3.54098e-10
HMGB2	25	182	100	0.549451	0.00567673	0.0101384	0.995681	1	0.0415555	0.24226	1	1	1	1.22825e-09	0.995195	0.985797	0.997876	1	0.999893	0.998605	1.81074e-13
APOLD1	25	182	96	0.527473	1.19398e-06	3.24655e-06	1	1	0.939923	1	0.983684	0.836503	1	0.000352214	1	1	0.980555	1	0.999811	0.997988	2.06286e-30
H2AFZ	25	182	107	0.587912	0.000296141	0.000627795	0.999801	1	0.794334	0.468797	1	0.867387	1	3.36639e-05	1	0.989483	0.957232	1	0.788252	0.970656	8.02921e-15
NUSAP1	25	182	104	0.571429	8.78109e-06	2.15498e-05	0.999996	1	0.889196	0.937206	1	1	1	5.90994e-06	1	1	1	1	0.966691	0.986275	1.319e-23
HMGN2	25	182	88	0.483516	0.000531155	0.00110138	0.999711	1	0.63477	1	0.97695	0.80966	1	3.44668e-05	0.839888	1	1	1	0.270149	0.902231	1.98752e-10
UBE2T	25	182	100	0.549451	7.5353e-05	0.000165808	0.999959	1	0.415623	0.986737	0.92562	0.848482	1	3.22213e-06	0.896118	1	0.984275	1	0.989326	0.981539	1.26194e-15
RPL31	26	182	97	0.532967	0.425534	0.581694	0.590683	1	0.997947	0.984884	1	0.00896222	0.995145	0.81999	0.232831	0.00059406	6.71566e-07	1	1	0.943643	0.999946
RPS12	26	182	91	0.5	0.443695	0.603356	0.578393	1	0.99698	1	1	0.0880166	0.868858	0.97147	0.69811	1.81936e-05	4.58816e-06	1	1	0.999454	0.999414
RPS29	26	182	76	0.417582	0.989515	1	0.0121137	0.0756561	0.992092	1	1	0.00047678	1	0.823635	0.556442	0.000254049	0.836586	1	0.999999	0.678918	0.999789
RPL34	26	182	108	0.593407	0.0674168	0.105263	0.938017	1	0.998989	1	1	0.0147409	0.832629	0.75592	0.103994	1.63827e-06	3.95653e-06	1	1	0.938153	0.999989
RPS25	26	182	94	0.516484	0.768222	0.984343	0.241635	1	1	1	1	0.0298734	0.963606	0.996429	0.722181	3.62458e-08	7.42263e-06	1	0.999992	0.932005	0.999999
RPS3	26	182	104	0.571429	0.676973	0.885804	0.327705	1	0.998691	0.937206	1	0.0433457	0.920031	0.998049	0.449476	8.36913e-05	1.13538e-07	1	1	0.757353	0.999593
RPS3A	26	182	95	0.521978	0.188753	0.269684	0.82751	1	0.997665	0.913767	1	0.257954	0.390716	0.976743	0.993712	0.0418755	3.70545e-13	1	0.999999	0.991169	0.999658
C1S	27	162	113	0.697531	1.72693e-06	4.55997e-06	0.999999	1	0.993752	0.101343	3.4453e-24	0.0180745	0.985102	0.963022	0.00515576	1	1	1	0.999086	0.000155537	0.996065
C1R	27	162	99	0.611111	2.13224e-05	4.94656e-05	0.99999	1	0.998195	0.792237	4.70222e-23	1.26131e-05	0.995654	0.93146	0.0125005	1	1	1	0.999877	1.47474e-05	0.999226
CHI3L1	27	162	106	0.654321	1.66543e-07	5.21634e-07	1	1	0.99885	0.00150846	3.51917e-24	6.5851e-10	0.997052	1	0.64518	1	1	1	0.68583	0.0419644	0.999998
IGFBP7	27	162	83	0.512346	7.83631e-05	0.000172069	0.999969	1	1	1	0.000592341	2.29749e-10	1	1	0.00983295	1	1	1	0.193842	2.11603e-05	0.928504
EFEMP1	27	162	74	0.45679	1.2408e-05	2.96146e-05	0.999997	1	0.947001	0.000228741	0.00337588	7.70246e-09	0.982691	0.988067	0.03569	1	1	1	0.999006	2.73723e-06	0.998581
MXRA5	27	162	67	0.41358	4.95225e-05	0.00011108	0.999989	1	1	4.91479e-07	2.15726e-19	1.68072e-10	1	1	0.0069936	1	1	1	0.99992	1	0.999194
IFIT1	28	167	105	0.628743	1	1	6.85197e-49	7.14661e-46	0.193633	1	0.988945	1	0.815876	1	0.996329	1	1	1	5.63361e-45	0.99999	0.999983
ISG15	28	167	103	0.616766	1	1	3.32839e-36	1.15717e-33	0.0987829	1	0.933046	1	0.803964	1	0.972612	1	1	1	7.64957e-40	0.999988	0.999886
IFIT3	28	167	120	0.718563	1	1	4.34666e-41	2.26678e-38	0.456642	1	1	1	0.989349	1	0.987482	0.993987	1	1	5.43813e-42	0.467037	0.999998
IFIT2	28	167	84	0.502994	1	1	7.08421e-28	6.71712e-26	0.995266	1	1	1	1	1	0.988643	0.97181	1	1	4.37154e-34	0.0870302	0.999993
IFI6	28	167	74	0.443114	1	1	4.25499e-25	2.46553e-23	0.035965	1	0.820637	1	0.760219	1	0.980581	1	1	1	2.70661e-27	1	0.994731
RSAD2	28	167	84	0.502994	1	1	7.08421e-28	6.71712e-26	0.031787	1	0.972608	1	0.942483	1	0.936032	1	1	1	4.54145e-25	0.942997	0.999937
KLK6	29	170	97	0.570588	1	1	4.62587e-19	1.12204e-17	0.984716	1	0.984374	1	0.254377	0.997021	0.232831	0.000157134	0.350753	1	1.1201e-09	0.998164	0.999992
S100B	29	170	111	0.652941	1	1	7.1105e-24	3.70812e-22	0.999167	1	1	1	0.374561	0.959549	0.212786	0.487388	0.210002	1	8.65963e-15	0.991928	0.999999
LINC00323	29	170	83	0.488235	1	1	7.34497e-11	8.80553e-10	0.891972	1	0.971401	1	0.649042	0.957268	0.427332	0.127465	0.00928796	1	9.61103e-06	0.993547	0.999927
LINC01549	29	170	84	0.494118	1	1	1.25992e-06	1.14269e-05	1	1	1	1	0.83075	0.993468	0.437629	0.00746329	1.65768e-09	1	0.000264628	0.994093	0.999993
USH1C	29	170	109	0.641176	1	1	4.17906e-15	7.2646e-14	0.999052	1	1	1	0.522974	0.98875	0.979177	0.00050662	4.89874e-10	1	6.38077e-08	0.999912	1
ADGRL4	30	133	88	0.661654	1	1	1.43036e-14	2.2604e-13	1	1	0.97695	1	1	0.13424	1	1	0.970396	1	0.999979	1.3029e-58	1
PCAT19	30	133	103	0.774436	1	1	1.34294e-10	1.55632e-09	1	1	1	1	1	0.243134	1	1	1	1	0.999998	1.55165e-78	1
ADGRF5	30	133	74	0.556391	1	1	6.48366e-21	2.24042e-19	1	1	0.957852	1	1	0.00319121	1	1	0.989371	1	0.999807	2.21797e-42	0.999998
ESAM	30	133	73	0.548872	0.999997	1	3.14604e-06	2.80455e-05	1	1	1	1	1	0.244565	1	1	0.988694	1	0.999775	4.63564e-51	0.999997
ROBO4	30	133	80	0.601504	1	1	2.32383e-08	2.24421e-07	1	1	1	1	1	0.49455	1	1	0.955227	1	0.999999	1.97279e-61	0.999999
KLK6	31	176	99	0.5625	1	1	4.26091e-20	1.23448e-18	0.998195	1	0.922977	0.845571	0.153481	0.99736	0.0125005	4.81267e-05	0.846423	1	3.07157e-08	0.896386	0.99996
MOG	31	176	98	0.556818	1	1	3.7938e-22	1.64965e-20	0.998075	1	0.985035	1	0.147406	0.111485	0.575048	0.000174608	1	1	2.5184e-07	0.804553	0.999999
MYLK	31	176	108	0.613636	1	1	4.67474e-12	6.0947e-11	0.905539	1	1	0.869889	0.513835	0.284727	0.103994	2.93908e-10	0.775183	1	2.82045e-05	0.972568	0.999999
PLEKHB1	31	176	108	0.613636	1	1	2.54053e-13	3.62983e-12	0.991719	1	0.990291	0.869889	0.513835	0.598804	0.022744	1.63827e-06	0.459138	1	0.0139863	0.938153	0.999943
SERPINI1	31	176	84	0.477273	0.999996	1	8.72352e-05	0.000699895	0.968911	1	0.972608	1	0.0329089	0.72339	0.264642	7.72615e-10	0.0591666	1	0.405762	0.942997	0.999937
HIST1H2AM	32	126	94	0.746032	0.0472564	0.0755957	0.960571	1	0.217627	0.910708	0.908391	1	0.742532	0.000278136	0.537416	0.981629	1	1	0.275162	0.932005	2.89526e-05
HIST1H1B	32	126	85	0.674603	0.17436	0.25223	0.848287	1	0.264646	0.878259	0.87547	1	0.667572	1.31729e-09	0.938773	0.972991	1	1	0.0560666	0.980414	0.0420548
HIST1H4C	32	126	100	0.793651	0.0814474	0.125665	0.927363	1	0.158517	1	0.92562	1	0.618459	8.14905e-13	0.412261	0.985797	1	1	0.858795	0.981539	0.000629773
HIST2H2AC	32	126	67	0.531746	0.0619322	0.097282	0.956969	1	0.226542	1	0.775333	1	0.478516	1.42452e-07	0.456637	0.941719	1	1	0.681186	0.833788	0.030095
RPL8	33	73	65	0.890411	8.52344e-06	2.09669e-05	0.999999	1	1	0.939283	0.937921	0.705661	0.0206739	1	0.968555	1	1	1	1	1	0.999988
COX6B1	33	73	60	0.821918	1.50806e-06	4.0331e-06	1	1	0.890781	1	1	0.676474	0.624191	1	1	1	1	1	1	0.998574	0.999971
EIF3K	33	73	58	0.794521	3.68695e-05	8.34162e-05	0.999996	1	0.879226	0.91778	1	0.292328	0.0324941	1	1	1	1	1	1	0.998223	1
RPS16	33	73	62	0.849315	9.62189e-07	2.66197e-06	1	1	1	1	0.929377	1	0.0158739	1	0.96308	1	1	1	1	1	1
HLA-DQA1	34	149	101	0.677852	0.729789	0.94438	0.364951	1	5.12417e-09	1	1	1	1	3.76234e-06	3.05929e-06	0.000857963	1	1	1	0.956384	0.994444
HLA-DQB1	34	149	99	0.66443	0.953357	1	0.172615	0.837382	7.7394e-15	1	1	1	1	0.00151334	0.0306435	2.29134e-09	1	1	1	0.703369	0.999802
HLA-DRB1	34	149	116	0.778523	0.990527	1	0.0422159	0.243266	2.05978e-08	1	1	1	1	0.00258488	0.000268849	1.14769e-15	1	1	1	0.994524	0.999982
HLA-DRB5	34	149	107	0.718121	0.999993	1	0.00048829	0.00363776	2.17022e-16	1	1	1	1	9.10768e-06	1	1.07305e-17	1	1	1	1	1
RPL30	35	109	65	0.59633	0.579637	0.770142	0.471993	1	0.984006	1	1	0.340325	0.00684979	0.97949	0.856205	3.75486e-08	0.749228	1	0.999888	0.999176	1
RPL35A	35	109	73	0.669725	0.0136723	0.0233773	0.991493	1	1	0.957081	0.955998	0.393909	6.92215e-19	1	0.897187	0.356345	0.436002	1	0.999998	1	1
RPL32	35	109	86	0.788991	0.0574492	0.0904479	0.953882	1	0.972096	0.9756	0.974872	0.476472	1.27817e-17	0.994211	0.9898	4.40339e-05	0.400616	1	1	1	1
RPL37A	35	109	79	0.724771	0.180124	0.25913	0.847456	1	0.959345	1	1	0.432806	3.86804e-10	1	0.920496	5.80075e-07	0.0940932	1	0.999989	0.999823	1
APLP1	36	146	96	0.657534	1	1	6.79255e-08	6.38254e-07	0.234439	0.984211	0.983684	0.102166	1	0.977907	0.000101152	0.00188621	0.207024	1	0.0197524	0.877956	1
CDK18	36	146	92	0.630137	0.999999	1	3.89194e-05	0.000324744	0.979876	0.981207	0.901864	0.51226	1	0.907694	7.36854e-07	0.0132483	0.464824	1	0.00283751	0.967154	0.999982
FGFR2	36	146	93	0.636986	0.999993	1	0.00650483	0.0423638	0.209399	1	0.751006	0.518069	1	0.911494	3.31839e-08	0.0141561	0.311792	1	0.355212	0.969396	0.999998
TF	36	146	93	0.636986	1	1	2.26639e-08	2.2092e-07	0.0574836	1	0.751006	0.0935549	1	0.974236	6.95334e-05	0.0889287	0.996721	1	4.35706e-05	0.856886	0.999903
FCN1	37	86	78	0.906977	0.122044	0.181328	0.900825	1	1	0.642343	0.00034315	8.69436e-05	1	0.836886	0.375449	0.102301	1	1	0.999999	0.279464	0.716047
CD300E	37	86	64	0.744186	0.152444	0.222377	0.884454	1	1	0.507341	2.44494e-07	0.000162665	1	0.72382	0.648818	0.271463	1	1	0.99999	0.492928	0.902357
LYZ	37	86	74	0.860465	0.103384	0.155374	0.919475	1	1	0.824022	1.60234e-06	5.94354e-05	1	0.809479	0.333882	0.189948	1	1	0.999998	0.651029	0.52035
GABRA4	38	93	80	0.860215	0.937439	1	0.0696754	0.380479	1	1	1	1	1	1.243e-97	1	1	1	1	0.999991	1	1
PDGFRA	38	93	79	0.849462	0.908358	1	0.102202	0.527706	1	1	1	1	1	1.41045e-93	1	1	1	1	0.999912	1	1
SHISA6	38	93	68	0.731183	0.997864	1	0.00267085	0.0182072	1	1	1	1	1	1.25035e-84	1	1	1	1	0.999995	1	1
CLSPN	39	99	80	0.808081	0.00184059	0.00354194	0.99899	1	0.96146	0.96833	1	1	0.931125	0.315035	1	1	1	1	0.681876	0.306846	1.75807e-18
FAM111B	39	99	69	0.69697	0.000894954	0.001802	0.999634	1	0.804566	0.948949	1	1	1	0.20663	0.974616	1	0.985525	1	0.821797	0.41754	1.25245e-15
RFC4	39	99	78	0.787879	0.00248985	0.00469604	0.99863	1	0.95712	1	1	1	0.924682	0.836886	0.984329	1	0.9917	1	0.756303	0.915399	4.35076e-25
CDK4	40	66	62	0.939394	1.59927e-05	3.78239e-05	0.999998	1	1	1	1	1	1	1	3.25162e-77	1	1	1	0.999815	1	1
2021-03-09	40	66	59	0.893939	0.000234524	0.000498184	0.999946	1	1	1	1	1	1	0.970586	5.87213e-76	1	1	1	1	1	1
MARS	40	66	60	0.909091	0.000193431	0.000415977	0.999955	1	1	1	1	1	1	0.972301	7.32222e-72	1	1	1	0.999743	1	1
C1QA	41	126	105	0.833333	0.912602	1	0.0868907	0.460036	0.96064	1	0.00407891	0.0129612	0.996883	0.733622	8.12257e-05	0.0679453	0.998443	1	0.900234	4.65525e-06	0.998775
C1QB	41	126	106	0.84127	0.976828	1	0.037872	0.21997	0.639757	0.98979	0.0124253	0.000727282	0.97923	0.869156	2.47184e-05	0.0710011	0.998537	1	0.68583	0.00228807	0.999986
C1QC	41	126	92	0.730159	0.999899	1	0.000243981	0.00187112	0.499359	0.981207	0.537636	0.00149801	0.960087	0.620494	0.00252113	0.979986	1	1	0.167638	3.83889e-05	0.999888
AKAP12	42	99	81	0.818182	2.14367e-05	4.94656e-05	0.999993	1	0.121818	0.860605	1	1	1.22983e-11	1	1	1	1	1	1.12929e-10	0.604293	0.999988
LGALS3	42	99	78	0.787879	5.57932e-06	1.39885e-05	0.999999	1	0.103623	0.965455	1	1	6.8993e-14	1	1	1	1	1	2.76254e-09	0.411801	1
PGK1	42	99	72	0.727273	1.84633e-05	4.33722e-05	0.999996	1	0.278733	0.955178	1	1	4.34222e-10	1	1	1	1	1	2.83777e-14	0.983263	0.999948
KLK6	43	111	83	0.747748	1	1	1.2666e-17	2.69605e-16	0.994952	1	0.971401	0.790711	0.824594	0.993062	0.0010197	0.000134938	0.877391	1	7.64998e-08	0.939048	0.999595
MBP	43	111	83	0.747748	1	1	5.69272e-16	1.02371e-14	0.891972	1	1	1	0.649042	0.957268	0.00983295	6.05935e-06	0.993908	1	3.09419e-06	0.939048	0.999595
PLEKHB1	43	111	87	0.783784	1	1	4.31785e-14	6.62282e-13	0.973569	1	0.975933	0.806012	0.493134	0.886398	0.0134991	4.98926e-05	0.766155	1	0.00264979	0.953496	0.999004
CLSPN	44	105	83	0.790476	0.0416721	0.0669707	0.968117	1	0.582291	0.683789	1	1	0.824594	0.0487905	0.933174	1	1	1	0.895285	0.764975	4.21214e-15
DTL	44	105	77	0.733333	0.0407166	0.0655361	0.970408	1	0.514404	0.963922	0.96296	1	0.985332	0.00138685	0.767046	0.834141	1	1	0.740768	0.963859	3.12959e-11
PCNA	44	105	84	0.8	0.188068	0.269075	0.836159	1	0.255082	0.691636	0.972608	1	0.83075	0.000278065	0.988643	0.868306	1	1	0.903296	0.942997	1.61954e-10
APOLD1	45	66	52	0.787879	9.08522e-06	2.19349e-05	1	1	1	1	1	1	1	0.811271	1	1	0.822414	1	1	1	2.50731e-34
LOC643201	45	66	56	0.848485	3.70272e-06	9.46553e-06	1	1	1	1	1	1	1	0.96478	1	1	0.652883	1	1	1	1.83043e-37
NMU	45	66	56	0.848485	3.70272e-06	9.46553e-06	1	1	1	1	1	1	1	0.842755	1	1	0.852912	1	1	1	1.83043e-37
F13A1	46	86	74	0.860465	1.2408e-05	2.96146e-05	0.999997	1	0.947001	0.958904	0.0867389	0.157452	0.982691	0.809479	0.53507	1	1	1	0.970412	6.62901e-29	1
FCGBP	46	86	70	0.813953	0.00270776	0.00509783	0.998678	1	0.812374	0.568471	0.165738	0.139941	0.97842	0.918905	0.97594	1	1	1	0.614635	2.27051e-23	1
RNASE2	46	86	66	0.767442	0.00501116	0.00898048	0.997519	1	0.984997	0.528224	0.0191546	0.347111	0.973098	0.980687	0.252694	1	1	1	0.778715	2.76914e-20	1
HBA1	47	103	92	0.893204	0.999899	1	9.9682e-05	0.000793651	1	0.343089	0.901864	0.0275468	0.543361	1.15782e-09	0.955067	0.0132483	1	1	0.99993	0.234587	0.999998
HBA2	47	103	101	0.980583	0.999655	1	0.000321147	0.00240976	1	0.418936	0.928178	0.00256571	0.448282	1.52715e-09	0.97001	0.00851788	1	1	0.999982	0.0922788	1
HBB	47	103	76	0.737864	0.994883	1	0.00592822	0.0388877	1	0.213382	0.831991	0.00047678	0.579019	0.0704473	0.90954	0.0366378	1	1	0.999254	0.0449656	0.999998
MAG	48	112	81	0.723214	1	1	5.42505e-10	6.08423e-09	0.740974	1	0.968825	0.782617	1	1	0.0560905	0.018066	0.202158	1	1.66696e-05	0.973314	0.999901
MYRF	48	112	84	0.75	1	1	3.25245e-05	0.000273573	0.593106	1	0.871206	0.203845	0.990034	0.538458	8.39569e-05	0.266068	0.0257303	1	0.050323	0.998902	0.999993
SLC48A1	48	112	85	0.758929	1	1	1.94933e-10	2.23423e-09	0.970545	1	0.973764	0.208653	0.99057	0.549162	0.00400752	0.274053	0.0628944	1	0.00855662	0.994593	0.999994
CRABP1	49	83	75	0.903614	5.16384e-08	1.7012e-07	1	1	1	1	1	1	1	1	0.54582	1	1	1	1	1	1.46984e-52
LOC643201	49	83	57	0.686747	2.95816e-06	7.63704e-06	1	1	1	1	1	1	1	1	1	1	1	1	1	1	7.61712e-47
SYT1	49	83	71	0.855422	1.27103e-07	4.04171e-07	1	1	1	1	1	1	1	1	0.502092	1	1	1	1	1	2.34112e-49
RPL32	50	89	73	0.820225	0.113523	0.169877	0.911337	1	0.944136	0.957081	0.186878	0.747023	1.14347e-15	1	0.897187	3.70078e-05	0.262694	1	0.999998	1	0.999997
RPL15	50	89	68	0.764045	0.176848	0.254769	0.859662	1	1	0.946687	0.152211	0.360616	5.18189e-08	1	0.46814	0.00042467	0.000551134	1	1	1	0.999993
RPL37A	50	89	69	0.775281	0.0946871	0.143336	0.92962	1	0.931142	1	1	0.727118	1.86268e-10	1	0.878275	3.66603e-06	0.000165329	1	0.999996	1	1
CD52	51	95	79	0.831579	0.968302	1	0.0356755	0.211418	0.959345	1	0.847814	0.00329677	0.409178	0.48333	0.385857	0.107107	0.952875	1	0.999999	0.000879843	0.991179
S100A4	51	95	77	0.810526	0.819177	1	0.201215	0.953943	0.954779	0.840647	0.96296	0.00289738	0.783548	0.657478	0.100711	0.0389414	0.947813	1	0.999985	0.00450752	0.988906
SH3BGRL3	51	95	78	0.821053	0.992584	1	0.00845017	0.0534153	0.95712	0.845866	0.637052	0.000558888	0.599821	0.667503	0.106045	0.219457	0.9917	1	0.999987	0.00514594	0.990104
DLL3	52	53	53	1	0.909567	1	0.117979	0.594456	1	0.897923	0.896061	1	1	6.01104e-19	0.766635	1.44344e-07	0.615444	1	0.999929	1	1
MAP2	52	53	53	1	0.909567	1	0.117979	0.594456	1	0.897923	0.896061	1	1	6.01104e-19	0.766635	1.44344e-07	0.615444	1	0.999929	1	1
MAP2	53	52	52	1	0.394468	0.541356	0.680647	1	0.963294	1	0.644239	1	1	5.46085e-18	0.279472	6.45901e-06	0.0322349	1	1	1	1
OLIG1	53	52	52	1	0.394468	0.541356	0.680647	1	0.963294	1	0.644239	1	1	5.46085e-18	0.279472	6.45901e-06	0.0322349	1	1	1	1
CNTN1	54	51	51	1	0.79808	1	0.254348	1	0.960874	0.888702	0.633654	1	1	3.01497e-37	0.933542	0.352918	0.589023	1	0.999898	1	1
MAP2	54	51	51	1	0.79808	1	0.254348	1	0.960874	0.888702	0.633654	1	1	3.01497e-37	0.933542	0.352918	0.589023	1	0.999898	1	1
DLL3	55	53	53	1	0.754439	0.967872	0.301456	1	1	1	1	1	1	1.08416e-06	0.519816	1.48968e-11	0.961181	1	0.999929	1	0.993952
GRIA2	55	53	53	1	0.754439	0.967872	0.301456	1	1	1	1	1	1	1.08416e-06	0.519816	1.48968e-11	0.961181	1	0.999929	1	0.993952
DLL3	56	52	52	1	0.0373286	0.0603624	0.980023	1	0.963294	0.893412	1	1	1	0.00921076	1	1.23059e-10	0.192432	1	0.999915	1	1
POLR2F	56	52	52	1	0.0373286	0.0603624	0.980023	1	0.963294	0.893412	1	1	1	0.00921076	1	1.23059e-10	0.192432	1	0.999915	1	1
DLL3	57	53	53	1	0.754439	0.967872	0.301456	1	0.845251	0.897923	1	1	1	3.18838e-13	0.766635	1.12283e-06	0.202971	1	1	1	1
SOX8	57	53	53	1	0.754439	0.967872	0.301456	1	0.845251	0.897923	1	1	1	3.18838e-13	0.766635	1.12283e-06	0.202971	1	1	1	1
CTSD	58	54	54	1	0.478189	0.646051	0.594633	1	0.967694	0.000355355	0.664685	0.637643	1	0.827658	4.82732e-08	0.898577	1	1	0.999308	0.00265529	0.879904
IFI30	58	54	54	1	0.478189	0.646051	0.594633	1	0.967694	0.000355355	0.664685	0.637643	1	0.827658	4.82732e-08	0.898577	1	1	0.999308	0.00265529	0.879904
IFI44L	59	52	52	1	1	1	2.8543e-17	5.61705e-16	0.00389621	0.64851	1	1	0.771159	1	1	1	1	1	5.97402e-10	0.996569	0.993043
MX2	59	52	52	1	1	1	2.8543e-17	5.61705e-16	0.00389621	0.64851	1	1	0.771159	1	1	1	1	1	5.97402e-10	0.996569	0.993043
LGALS3	60	50	50	1	0.00129286	0.00258325	0.999683	1	0.000750431	1	1	1	2.72898e-10	1	1	1	1	1	5.63391e-05	0.90094	1
MT1X	60	50	50	1	0.00129286	0.00258325	0.999683	1	0.000750431	1	1	1	2.72898e-10	1	1	1	1	1	5.63391e-05	0.90094	1
EFHD1	61	52	52	1	0.998497	1	0.028484	0.172136	0.396364	0.893412	0.891505	0.623699	0.941881	0.585004	1.4595e-06	0.019411	0.370896	1	0.489615	0.914954	0.999883
PCSK6	61	52	52	1	0.998497	1	0.028484	0.172136	0.396364	0.893412	0.891505	0.623699	0.941881	0.585004	1.4595e-06	0.019411	0.370896	1	0.489615	0.914954	0.999883
CTSB	62	52	52	1	0.533089	0.714668	0.542696	1	0.626655	0.0655953	0.169615	0.250857	1	0.811271	1.4595e-06	0.166316	1	1	0.999915	0.449352	0.448511
CTSD	62	52	52	1	0.533089	0.714668	0.542696	1	0.626655	0.0655953	0.169615	0.250857	1	0.811271	1.4595e-06	0.166316	1	1	0.999915	0.449352	0.448511
CTSB	63	57	57	1	0.399587	0.546942	0.666894	1	1	0.00238966	0.00891086	0.0884714	1	0.966832	4.45202e-06	0.689378	0.969658	1	0.999577	0.126843	0.566037
CTSL	63	57	57	1	0.399587	0.546942	0.666894	1	1	0.00238966	0.00891086	0.0884714	1	0.966832	4.45202e-06	0.689378	0.969658	1	0.999577	0.126843	0.566037
CLDN11	64	57	57	1	0.999968	1	0.00723713	0.0463087	0.0579795	1	0.912458	1	1	0.0013691	2.48949e-05	0.0291994	0.664769	1	0.741021	0.942443	1
EFHD1	64	57	57	1	0.999968	1	0.00723713	0.0463087	0.0579795	1	0.912458	1	1	0.0013691	2.48949e-05	0.0291994	0.664769	1	0.741021	0.942443	1
CTSD	65	55	55	1	0.998711	1	0.00187411	0.0131188	0.85977	2.77261e-07	0.403277	1	1	0.62349	1.69505e-05	0.6703	1	1	0.999951	0.200496	0.793958
GPNMB	65	55	55	1	0.998711	1	0.00187411	0.0131188	0.85977	2.77261e-07	0.403277	1	1	0.62349	1.69505e-05	0.6703	1	1	0.999951	0.200496	0.793958
CTSL	66	52	52	1	0.158935	0.230555	0.89055	1	1	0.00560802	0.0638656	0.0713209	1	0.955224	2.10112e-07	0.889565	1	1	0.877321	0.0813468	0.8563
IFI30	66	52	52	1	0.158935	0.230555	0.89055	1	1	0.00560802	0.0638656	0.0713209	1	0.955224	2.10112e-07	0.889565	1	1	0.877321	0.0813468	0.8563
CPNE4	67	55	55	1	0.00872861	0.0154043	0.996188	1	9.39e-36	1	1	0.644421	0.00787033	1	1	1	1	1	0.999951	0.505282	1
NOS2	67	55	55	1	0.00872861	0.0154043	0.996188	1	9.39e-36	1	1	0.644421	0.00787033	1	1	1	1	1	0.999951	0.505282	1
NKX6-2	68	52	52	1	0.998497	1	0.028484	0.172136	0.626655	0.893412	0.891505	0.623699	1	0.353247	5.18813e-05	0.00515194	1	1	0.489615	0.975902	0.998717
PCSK6	68	52	52	1	0.998497	1	0.028484	0.172136	0.626655	0.893412	0.891505	0.623699	1	0.353247	5.18813e-05	0.00515194	1	1	0.489615	0.975902	0.998717
IFI44L	69	48	48	1	1	1	3.73283e-11	4.5804e-10	0.339497	0.873293	1	1	0.472005	1	0.716811	1	1	1	2.09111e-09	0.96513	0.987905
MX1	69	48	48	1	1	1	3.73283e-11	4.5804e-10	0.339497	0.873293	1	1	0.472005	1	0.716811	1	1	1	2.09111e-09	0.96513	0.987905
CLDN11	70	52	52	1	1	1	0.00226445	0.0155383	0.00389621	1	1	1	1	0.00921076	0.279472	4.13754e-05	0.192432	1	0.773385	0.975902	1
EDIL3	70	52	52	1	1	1	0.00226445	0.0155383	0.00389621	1	1	1	1	0.00921076	0.279472	4.13754e-05	0.192432	1	0.773385	0.975902	1
ABCA2	71	55	55	1	0.999949	1	0.00187411	0.0131188	0.664608	1	0.90461	0.0814162	1	0.835362	0.006678	0.191174	0.640699	1	0.417266	0.932615	0.999931
NKX6-2	71	55	55	1	0.999949	1	0.00187411	0.0131188	0.664608	1	0.90461	0.0814162	1	0.835362	0.006678	0.191174	0.640699	1	0.417266	0.932615	0.999931
MT1X	72	61	61	1	0.0273901	0.045274	0.984043	1	5.623e-21	0.927795	1	0.103318	2.44393e-06	0.973916	1	0.924726	1	1	0.691237	0.989675	1
MT2A	72	61	61	1	0.0273901	0.045274	0.984043	1	5.623e-21	0.927795	1	0.103318	2.44393e-06	0.973916	1	0.924726	1	1	0.691237	0.989675	1
CPNE4	73	52	52	1	9.08522e-06	2.19349e-05	1	1	1.88849e-32	1	1	1	6.70056e-05	1	0.506875	1	1	1	0.999915	0.996569	1
ELOVL2	73	52	52	1	9.08522e-06	2.19349e-05	1	1	1.88849e-32	1	1	1	6.70056e-05	1	0.506875	1	1	1	0.999915	0.996569	1
FTL	74	55	55	1	0.999839	1	0.000242201	0.00187112	1	3.98761e-10	0.403277	0.644421	1	0.835362	1.69505e-05	1	0.96568	1	0.999951	0.0224284	0.982755
GPNMB	74	55	55	1	0.999839	1	0.000242201	0.00187112	1	3.98761e-10	0.403277	0.644421	1	0.835362	1.69505e-05	1	0.96568	1	0.999951	0.0224284	0.982755
AKAP12	75	56	56	1	0.0004166	0.000869028	0.999902	1	0.0198187	1	1	1	2.38626e-12	1	1	1	1	1	0.0067227	0.116828	0.999317
HILPDA	75	56	56	1	0.0004166	0.000869028	0.999902	1	0.0198187	1	1	1	2.38626e-12	1	1	1	1	1	0.0067227	0.116828	0.999317
MT1X	76	53	53	1	0.00343275	0.00634415	0.998813	1	2.22812e-06	1	1	1	7.11506e-13	0.957831	1	1	1	1	0.00134143	1	1
MT3	76	53	53	1	0.00343275	0.00634415	0.998813	1	2.22812e-06	1	1	1	7.11506e-13	0.957831	1	1	1	1	0.00134143	1	1
CHRNA1	77	58	58	1	0.00144405	0.00284785	0.999516	1	1.02079e-49	1	1	1	0.192326	1	1	1	1	1	1	0.726851	1
NOS2	77	58	58	1	0.00144405	0.00284785	0.999516	1	1.02079e-49	1	1	1	0.192326	1	1	1	1	1	1	0.726851	1
AKAP12	78	59	59	1	0.000234524	0.000498184	0.999946	1	0.294145	0.921264	0.919663	1	6.96634e-11	1	1	1	1	1	8.57267e-05	0.0768205	0.999966
NRN1	78	59	59	1	0.000234524	0.000498184	0.999946	1	0.294145	0.921264	0.919663	1	6.96634e-11	1	1	1	1	1	8.57267e-05	0.0768205	0.999966
MBP	79	55	55	1	1	1	7.81848e-05	0.000632145	0.0493289	1	1	1	0.333328	0.962601	0.545137	1.93013e-13	0.411898	1	0.417266	0.98179	1
PLP1	79	55	55	1	1	1	7.81848e-05	0.000632145	0.0493289	1	1	1	0.333328	0.962601	0.545137	1.93013e-13	0.411898	1	0.417266	0.98179	1
MX2	80	56	56	1	1	1	8.38645e-26	5.46692e-24	0.0535446	0.688357	1	1	0.576886	1	1	0.679955	1	1	6.14155e-20	1	1
SIGLEC1	80	56	56	1	1	1	8.38645e-26	5.46692e-24	0.0535446	0.688357	1	1	0.576886	1	1	0.679955	1	1	6.14155e-20	1	1
AKAP12	81	57	57	1	0.00172009	0.00334712	0.99942	1	0.0579795	0.0895873	1	1	1.01378e-06	1	1	1	1	1	0.000456681	0.0634187	0.999951
VEGFA	81	57	57	1	0.00172009	0.00334712	0.99942	1	0.0579795	0.0895873	1	1	1.01378e-06	1	1	1	1	1	0.000456681	0.0634187	0.999951
IFI44L	82	50	50	1	1	1	2.91809e-18	6.61645e-17	0.000169553	1	1	1	0.93513	1	0.737731	1	1	1	3.6443e-08	0.995728	0.702981
XAF1	82	50	50	1	1	1	2.91809e-18	6.61645e-17	0.000169553	1	1	1	0.93513	1	0.737731	1	1	1	3.6443e-08	0.995728	0.702981
HSPA2	83	57	57	1	1	1	1.20045e-08	1.19244e-07	0.46617	1	1	0.657604	0.589054	0.231212	1	0.420817	9.66323e-05	1	0.018345	1	0.999951
LOC100506725	83	57	57	1	1	1	1.20045e-08	1.19244e-07	0.46617	1	1	0.657604	0.589054	0.231212	1	0.420817	9.66323e-05	1	0.018345	1	0.999951
HLA-DQB1	84	56	56	1	0.18755	0.26907	0.862402	1	7.91355e-07	1	1	1	1	0.102147	0.160478	0.00776674	1	1	1	6.5681e-06	0.999317
MS4A6A	84	56	56	1	0.18755	0.26907	0.862402	1	7.91355e-07	1	1	1	1	0.102147	0.160478	0.00776674	1	1	1	6.5681e-06	0.999317
ATP1A2	85	51	51	1	0.287464	0.400836	0.781941	1	1.47218e-34	0.63794	1	1	0.284663	0.802569	0.267837	1	1	1	0.998869	1	1
MYBPC1	85	51	51	1	0.287464	0.400836	0.781941	1	1.47218e-34	0.63794	1	1	0.284663	0.802569	0.267837	1	1	1	0.998869	1	1
CCDC74A	86	20	20	1	0.0698921	0.10864	0.985495	1	1	1	1	1	1	0.696213	1	1	1	1	1	1	9.93822e-15
TP73	86	20	20	1	0.0698921	0.10864	0.985495	1	1	1	1	1	1	0.696213	1	1	1	1	1	1	9.93822e-15
APOC1	87	62	62	1	0.842946	1	0.188563	0.902162	0.330951	1.76378e-07	0.480776	1	0.0444843	0.484787	1.26817e-12	0.475537	1	1	0.999986	0.998855	0.998326
APOE	87	62	62	1	0.842946	1	0.188563	0.902162	0.330951	1.76378e-07	0.480776	1	0.0444843	0.484787	1.26817e-12	0.475537	1	1	0.999986	0.998855	0.998326
ATP1A2	88	52	52	1	0.0833535	0.12785	0.980023	1	8.6833e-20	0.0655953	1	1	0.771159	1	0.0047182	0.019411	0.370896	1	1	1	1
CST3	88	52	52	1	0.0833535	0.12785	0.980023	1	8.6833e-20	0.0655953	1	1	0.771159	1	0.0047182	0.019411	0.370896	1	1	1	1
CCL7	89	58	58	1	3.68695e-05	8.34162e-05	0.999996	1	1	1	0.221129	1	1	1	1	1	1	1	1	1.7075e-49	1
CXCL6	89	58	58	1	3.68695e-05	8.34162e-05	0.999996	1	1	1	0.221129	1	1	1	1	1	1	1	1	1.7075e-49	1
BTG2	90	52	52	1	0.999996	1	7.25802e-06	6.36144e-05	1	1	1	0.623699	1	0.955224	3.56213e-10	0.889565	0.370896	1	0.944548	0.449352	0.600019
EGR3	90	52	52	1	0.999996	1	7.25802e-06	6.36144e-05	1	1	1	0.623699	1	0.955224	3.56213e-10	0.889565	0.370896	1	0.944548	0.449352	0.600019
EGR2	91	60	60	1	1	1	4.63786e-14	6.91041e-13	1	0.9246	1	0.676474	0.962567	1	8.16444e-06	0.716287	0.478761	1	0.791849	0.593302	0.237542
EGR3	91	60	60	1	1	1	4.63786e-14	6.91041e-13	1	0.9246	1	0.676474	0.962567	1	8.16444e-06	0.716287	0.478761	1	0.791849	0.593302	0.237542
FAM27B	92	62	62	1	0.00911881	0.0160387	0.995407	1	1	0.485991	0.480776	0.688478	0.646449	0.703492	0.96308	1	1	1	0.00381985	0.458547	0.0143031
FAM27C	92	62	62	1	0.00911881	0.0160387	0.995407	1	1	0.485991	0.480776	0.688478	0.646449	0.703492	0.96308	1	1	1	0.00381985	0.458547	0.0143031
FCER1G	93	55	55	1	0.000503952	0.00104706	0.999881	1	0.85977	0.906383	0.0774655	0.000492706	0.797518	0.835362	0.314795	1	1	1	0.821786	1.50501e-10	0.999931
FCGBP	93	55	55	1	0.000503952	0.00104706	0.999881	1	0.85977	0.906383	0.0774655	0.000492706	0.797518	0.835362	0.314795	1	1	1	0.821786	1.50501e-10	0.999931
DUSP1	94	57	57	1	0.999898	1	0.0012008	0.00863746	0.46617	0.0895873	1	6.71192e-08	0.813568	1	0.0716768	1	0.438931	1	0.989571	0.712385	0.996564
FOS	94	57	57	1	0.999898	1	0.0012008	0.00863746	0.46617	0.0895873	1	6.71192e-08	0.813568	1	0.0716768	1	0.438931	1	0.989571	0.712385	0.996564
CPNE8	95	52	52	1	9.08522e-06	2.19349e-05	1	1	1	1	1	1	1	1	1	1	1	1	5.30107e-42	1	1
FXYD7	95	52	52	1	9.08522e-06	2.19349e-05	1	1	1	1	1	1	1	1	1	1	1	1	5.30107e-42	1	1
FXYD5	96	61	61	1	1.20462e-06	3.24655e-06	1	1	1	1	1	1	1	1	1	1	1	1	3.00224e-49	1	1
FXYD7	96	61	61	1	1.20462e-06	3.24655e-06	1	1	1	1	1	1	1	1	1	1	1	1	3.00224e-49	1	1
H3F3B	97	62	62	1	0.945407	1	0.0680862	0.375735	0.742027	1	0.929377	1	1	1	1	0.927867	0.977706	1	5.72554e-06	0.00121548	0.0299508
H3F3C	97	62	62	1	0.945407	1	0.0680862	0.375735	0.742027	1	0.929377	1	1	1	1	0.927867	0.977706	1	5.72554e-06	0.00121548	0.0299508
FCGR3A	98	52	52	1	0.0833535	0.12785	0.948655	1	1	0.893412	0.644239	0.250857	0.941881	0.955224	0.936998	1	1	1	0.999039	5.71103e-33	1
HAMP	98	52	52	1	0.0833535	0.12785	0.948655	1	1	0.893412	0.644239	0.250857	0.941881	0.955224	0.936998	1	1	1	0.999039	5.71103e-33	1
HIST1H4J	99	60	60	1	0.0122162	0.0210256	0.993784	1	0.306346	0.724429	1	0.306111	8.38485e-15	1	0.604896	1	0.698642	1	0.884029	0.988644	0.354351
HIST1H4K	99	60	60	1	0.0122162	0.0210256	0.993784	1	0.306346	0.724429	1	0.306111	8.38485e-15	1	0.604896	1	0.698642	1	0.884029	0.988644	0.354351
GPIHBP1	100	52	52	1	1	1	0.000285293	0.00215624	0.212006	0.893412	1	1	0.771159	0.955224	0.936998	0.889565	6.81207e-06	1	0.00287587	1	1
HSPA2	100	52	52	1	1	1	0.000285293	0.00215624	0.212006	0.893412	1	1	0.771159	0.955224	0.936998	0.889565	6.81207e-06	1	0.00287587	1	1
HSPA6	101	53	53	1	0.999268	1	0.00110499	0.00805946	0.845251	0.00623601	0.380485	1	1	1	0.940274	1	1	1	0.790503	1.22344e-05	0.868542
HSPA7	101	53	53	1	0.999268	1	0.00110499	0.00805946	0.845251	0.00623601	0.380485	1	1	1	0.940274	1	1	1	0.790503	1.22344e-05	0.868542
KLF2	102	58	58	1	1	1	4.62531e-22	1.85546e-20	7.36391e-11	1	1	1	1	0.968765	1	1	0.866304	1	0.931865	0.388632	0.000125494
KLF6	102	58	58	1	1	1	4.62531e-22	1.85546e-20	7.36391e-11	1	1	1	1	0.968765	1	1	0.866304	1	0.931865	0.388632	0.000125494
LGALS7	103	65	65	1	0.00174791	0.00338231	0.999275	1	0.570887	0.76451	1	1	0.128776	0.896882	1	1	1	1	0.987993	0.813508	4.46791e-15
LGALS7B	103	65	65	1	0.00174791	0.00338231	0.999275	1	0.570887	0.76451	1	1	0.128776	0.896882	1	1	1	1	0.987993	0.813508	4.46791e-15
ADARB2	104	54	54	1	0.993791	1	0.132809	0.653394	0.652276	1	1	0.264683	1	0.960287	1	0.898577	7.04818e-21	1	0.955679	1	0.999064
LINC00844	104	54	54	1	0.993791	1	0.132809	0.653394	0.652276	1	1	0.264683	1	0.960287	1	0.898577	7.04818e-21	1	0.955679	1	0.999064
CH17-408M7.1	105	80	80	1	0.101972	0.153695	0.95608	1	0.96146	0.96833	0.428499	1	0.98757	0.950368	0.597554	0.00542286	0.00706179	1	0.0315119	0.442306	0.97929
LOC101927468	105	80	80	1	0.101972	0.153695	0.95608	1	0.96146	0.96833	0.428499	1	0.98757	0.950368	0.597554	0.00542286	0.00706179	1	0.0315119	0.442306	0.97929
CXCL6	106	63	63	1	7.68518e-07	2.14322e-06	1	1	1	1	0.932348	1	1	1	1	1	1	1	1	2.16394e-61	1
LUM	106	63	63	1	7.68518e-07	2.14322e-06	1	1	1	1	0.932348	1	1	1	1	1	1	1	1	2.16394e-61	1
MST1L	107	50	50	1	0.715914	0.92873	0.488513	1	0.59977	0.00449547	0.881787	1	0.123673	0.793513	0.737731	0.61849	0.953308	1	0.10725	0.59652	0.82901
MST1P2	107	50	50	1	0.715914	0.92873	0.488513	1	0.59977	0.00449547	0.881787	1	0.123673	0.793513	0.737731	0.61849	0.953308	1	0.10725	0.59652	0.82901
NPY1R	108	65	65	1	8.52344e-06	2.09669e-05	0.999999	1	1	1	1	1	0.000127692	1	1	1	1	1	9.85714e-30	0.999176	1
NPY5R	108	65	65	1	8.52344e-06	2.09669e-05	0.999999	1	1	1	1	1	0.000127692	1	1	1	1	1	9.85714e-30	0.999176	1
OLIG1	109	54	54	1	0.612065	0.810131	0.456172	1	0.852673	0.902244	0.1863	1	1	4.94557e-13	0.143954	0.00151789	0.213699	1	0.999941	1	0.999064
OLIG2	109	54	54	1	0.612065	0.810131	0.456172	1	0.852673	0.902244	0.1863	1	1	4.94557e-13	0.143954	0.00151789	0.213699	1	0.999941	1	0.999064
EVI2A	110	53	53	1	1	1	6.4987e-09	6.64524e-08	6.37598e-05	0.897923	1	0.630736	0.780261	0.598106	0.940274	0.894167	0.0912552	1	0.0836162	0.996925	0.977904
OMG	110	53	53	1	1	1	6.4987e-09	6.64524e-08	6.37598e-05	0.897923	1	0.630736	0.780261	0.598106	0.940274	0.894167	0.0912552	1	0.0836162	0.996925	0.977904
LOC653786	111	71	71	1	0.999987	1	1.62224e-05	0.000137561	0.989107	9.74127e-20	1	0.737257	0.979577	0.786462	1.17108e-05	1	1	1	0.999959	0.00189281	0.999938
OTOA	111	71	71	1	0.999987	1	1.62224e-05	0.000137561	0.989107	9.74127e-20	1	0.737257	0.979577	0.786462	1.17108e-05	1	1	1	0.999959	0.00189281	0.999938
CX3CR1	112	57	57	1	0.999968	1	4.79986e-05	0.000394193	0.973327	0.00238966	1	1	0.95585	0.849845	1.44368e-08	0.91074	0.438931	1	0.989571	1	0.185345
P2RY12	112	57	57	1	0.999968	1	4.79986e-05	0.000394193	0.973327	0.00238966	1	1	0.95585	0.849845	1.44368e-08	0.91074	0.438931	1	0.989571	1	0.185345
MCM4	113	49	49	1	0.0553605	0.0880199	0.969661	1	0.0771635	0.148617	1	1	1	0.0212851	0.926055	1	0.950344	1	0.414609	0.757588	0.000957099
PCNA	113	49	49	1	0.0553605	0.0880199	0.969661	1	0.0771635	0.148617	1	1	1	0.0212851	0.926055	1	0.950344	1	0.414609	0.757588	0.000957099
CRYAB	114	59	59	1	1	1	8.68767e-06	7.48863e-05	0.710739	0.715755	1	0.00452984	0.0352614	1	1	3.7755e-06	0.134329	1	0.999976	0.998408	1
PTGDS	114	59	59	1	1	1	8.68767e-06	7.48863e-05	0.710739	0.715755	1	0.00452984	0.0352614	1	1	3.7755e-06	0.134329	1	0.999976	0.998408	1
ESCO2	115	51	51	1	0.560953	0.746268	0.515836	1	0.382182	1	0.88675	1	0.761732	2.33325e-05	1	0.884764	1	1	0.998869	0.430379	3.25503e-06
RAD51AP1	115	51	51	1	0.560953	0.746268	0.515836	1	0.382182	1	0.88675	1	0.761732	2.33325e-05	1	0.884764	1	1	0.998869	0.430379	3.25503e-06
DPYSL5	116	52	52	1	0.999819	1	0.00569012	0.037562	0.626655	1	1	0.623699	0.771159	0.353247	0.0496404	0.364342	0.084924	1	0.225131	0.996569	0.999883
RAPGEF5	116	52	52	1	0.999819	1	0.00569012	0.037562	0.626655	1	1	0.623699	0.771159	0.353247	0.0496404	0.364342	0.084924	1	0.225131	0.996569	0.999883
KLF2	117	56	56	1	1	1	1.55031e-17	3.17053e-16	2.78267e-15	1	1	1	1	0.96478	1	1	0.425454	1	0.964734	0.353618	0.169258
RHOB	117	56	56	1	1	1	1.55031e-17	3.17053e-16	2.78267e-15	1	1	1	1	0.96478	1	1	0.425454	1	0.964734	0.353618	0.169258
RN7SK	118	69	69	1	0.999939	1	0.00330052	0.0222093	0.0240664	1	0.947732	0.727118	0.0100924	0.769875	0.878275	0.946486	0.985525	1	0.997978	0.00947156	0.997202
RN7SL2	118	69	69	1	0.999939	1	0.00330052	0.0222093	0.0240664	1	0.947732	0.727118	0.0100924	0.769875	0.878275	0.946486	0.985525	1	0.997978	0.00947156	0.997202
RNR1	119	54	54	1	0.000609245	0.00124841	0.999855	1	0.967694	1	1	0.264683	0.0645846	0.610936	0.532573	9.69594e-20	0.0132734	1	0.995978	1	0.999917
RNR2	119	54	54	1	0.000609245	0.00124841	0.999855	1	0.967694	1	1	0.264683	0.0645846	0.610936	0.532573	9.69594e-20	0.0132734	1	0.995978	1	0.999917
RPS13	120	53	53	1	0.754439	0.967872	0.301456	1	0.845251	0.897923	0.654582	1	0.539064	0.957831	0.766635	4.91705e-05	0.0912552	1	1	0.978044	0.993952
RPS23	120	53	53	1	0.754439	0.967872	0.301456	1	0.845251	0.897923	0.654582	1	0.539064	0.957831	0.766635	4.91705e-05	0.0912552	1	1	0.978044	0.993952
CLEC4E	121	51	51	1	0.175263	0.252834	0.878409	1	1	0.888702	0.0183984	2.99041e-07	1	0.952455	0.933542	0.352918	0.0788445	1	1	0.614578	1
S100A12	121	51	51	1	0.175263	0.252834	0.878409	1	1	0.888702	0.0183984	2.99041e-07	1	0.952455	0.933542	0.352918	0.0788445	1	1	0.614578	1
PFN1	122	58	58	1	0.0848303	0.129165	0.943819	1	0.282032	0.706854	1	0.0920929	0.958213	0.968765	0.00919953	0.698572	0.866304	1	0.997776	0.0322305	0.917408
S100A4	122	58	58	1	0.0848303	0.129165	0.943819	1	0.282032	0.706854	1	0.0920929	0.958213	0.968765	0.00919953	0.698572	0.866304	1	0.997776	0.0322305	0.917408
PLA2G2A	123	58	58	1	2.36323e-06	6.11625e-06	1	1	1	0.91778	2.57495e-67	0.664012	1	1	1	1	1	1	1	0.986273	0.999959
SAA1	123	58	58	1	2.36323e-06	6.11625e-06	1	1	1	0.91778	2.57495e-67	0.664012	1	1	1	1	1	1	1	0.986273	0.999959
B4GALNT1	124	55	55	1	6.87644e-05	0.000151952	0.999992	1	1	1	0.90461	1	1	0.835362	2.37687e-60	1	1	1	1	1	0.9992
SLC26A10	124	55	55	1	6.87644e-05	0.000151952	0.999992	1	1	1	0.90461	1	1	0.835362	2.37687e-60	1	1	1	1	1	0.9992
ALDOC	125	52	52	1	0.0373286	0.0603624	0.993827	1	0.626655	0.172937	0.644239	1	1	0.179299	0.279472	0.019411	3.33208e-13	1	1	0.914954	1
SPARCL1	125	52	52	1	0.0373286	0.0603624	0.993827	1	0.626655	0.172937	0.644239	1	1	0.179299	0.279472	0.019411	3.33208e-13	1	1	0.914954	1
CPE	126	57	57	1	0.275115	0.385678	0.875199	1	0.873034	1	1	1	1	0.419873	0.0716768	9.4116e-05	1.46714e-08	1	1	0.000134718	1
SPARCL1	126	57	57	1	0.275115	0.385678	0.875199	1	0.873034	1	1	1	1	0.419873	0.0716768	9.4116e-05	1.46714e-08	1	1	0.000134718	1
GAP43	127	55	55	1	0.00243432	0.00459963	0.99917	1	0.969692	1	1.07658e-15	0.00333746	1	1	1	0.398389	1	1	2.41351e-05	0.997531	0.9992
SPOCD1	127	55	55	1	0.00243432	0.00459963	0.99917	1	0.969692	1	1.07658e-15	0.00333746	1	1	1	0.398389	1	1	2.41351e-05	0.997531	0.9992
MLLT11	128	53	53	1	0.00343275	0.00634415	0.998813	1	1	1	0.380485	1	1	0.000759665	0.135984	0.650289	1	1	0.999184	1	1.53851e-12
STMN2	128	53	53	1	0.00343275	0.00634415	0.998813	1	1	1	0.380485	1	1	0.000759665	0.135984	0.650289	1	1	0.999184	1	1.53851e-12
MYBPHL	129	43	43	1	6.82923e-05	0.000151551	1	1	1	1	1	1	1	1	1	1	1	1	1	1	2.11847e-35
TAC3	129	43	43	1	6.82923e-05	0.000151551	1	1	1	1	1	1	1	1	1	1	1	1	1	1	2.11847e-35
PDIA2	130	52	52	1	1	1	3.5882e-09	3.85824e-08	0.963294	1	0.644239	0.0713209	0.771159	0.585004	0.757322	0.00515194	0.602378	1	8.25767e-06	1	0.999883
TMEM151A	130	52	52	1	1	1	3.5882e-09	3.85824e-08	0.963294	1	0.644239	0.0713209	0.771159	0.585004	0.757322	0.00515194	0.602378	1	8.25767e-06	1	0.999883
OLR1	131	53	53	1	1	1	5.96684e-13	8.23798e-12	0.639625	0.0226585	1	1	1	0.819631	0.00531448	0.894167	0.961181	1	0.660894	0.649236	0.00653268
TMEM52B	131	53	53	1	1	1	5.96684e-13	8.23798e-12	0.639625	0.0226585	1	1	1	0.819631	0.00531448	0.894167	0.961181	1	0.660894	0.649236	0.00653268
PDLIM4	132	65	65	1	4.90216e-07	1.40466e-06	1	1	1	1	1	0.705661	1	1	1	1	1	1	1.24097e-45	0.992959	1
TNFRSF12A	132	65	65	1	4.90216e-07	1.40466e-06	1	1	1	1	1	0.705661	1	1	1	1	1	1	1.24097e-45	0.992959	1
KLF2	133	55	55	1	1	1	5.64645e-15	9.34801e-14	2.33785e-13	1	1	1	1	1	1	0.902804	0.0420931	1	0.98643	0.681859	0.0452367
TSC22D3	133	55	55	1	1	1	5.64645e-15	9.34801e-14	2.33785e-13	1	1	1	1	1	1	0.902804	0.0420931	1	0.98643	0.681859	0.0452367
APOE	134	54	54	1	0.942814	1	0.075609	0.406496	0.111012	1.10377e-05	0.00663297	0.637643	0.551885	0.379998	1.38845e-05	0.182758	1	1	1	0.980002	0.999064
TYROBP	134	54	54	1	0.942814	1	0.075609	0.406496	0.111012	1.10377e-05	0.00663297	0.637643	0.551885	0.379998	1.38845e-05	0.182758	1	1	1	0.980002	0.999064
